# Supplementary material for: Model Parameter Estimation Method on Multichannel Structural Response from Turbulence Flutter Test
Source: Hindawi journal article supplement (doi:10.1155/2022/3343675), 2022-06-11
Supplement: f1 [file 3343675.f1.zip]

Archive with 3 entries (3 files):
- 12 channles-wing.txt
- 4 channles-horizontal tail.txt
- data_description.txt
