# Supplementary material for: Model Parameter Estimation Method on Multichannel Structural Response from Turbulence Flutter Test
Source: Hindawi journal article supplement (doi:10.1155/2022/3343675), 2022-06-11
Supplement: f1 [file 3343675.f1.zip › 4 channles-horizontal tail.txt]

1.067525	-0.445109	-0.465361	0.119434
0.207122	-0.313454	-0.380789	0.121728
-0.806543	-0.164533	-0.257361	0.191682
-0.817945	-0.050864	-0.146504	0.058654
0.040265	0.028306	-0.060789	-0.235863
0.493154	0.107499	0.030658	-0.262209
0.164837	0.216211	0.015784	-0.143080
0.096265	0.342920	0.067271	-0.186608
0.565237	0.442992	0.240040	-0.192335
0.352422	0.465311	0.305257	0.071269
-0.443163	0.380357	0.195417	0.329296
-0.444306	0.193892	0.058118	0.339617
0.060837	-0.037195	-0.064218	0.238700
-0.083163	-0.224246	-0.151075	0.095351
-0.309449	-0.292591	-0.074504	-0.069769
0.155694	-0.234318	-0.025361	-0.207226
0.445099	-0.104821	-0.121361	-0.223263
0.250591	0.021106	-0.229932	-0.092679
0.229996	0.090941	-0.369361	0.023104
-0.014592	0.095980	-0.104218	0.087324
-0.677449	0.062863	0.582145	0.133195
-0.604306	0.033345	0.586722	0.098792
0.264321	0.041265	-0.122504	0.024250
0.527479	0.088781	-0.383075	-0.131625
0.173979	0.145656	-0.167075	-0.377902
0.178551	0.168694	-0.013932	-0.327501
0.219699	0.128378	0.122191	0.120581
-0.296878	0.023986	0.019216	0.307507
-0.811103	-0.115613	-0.283646	0.077003
-0.726592	-0.232879	-0.269932	-0.041116
-0.234021	-0.273166	-0.064218	-0.042263
0.354710	-0.216332	-0.021932	-0.183171
0.584688	-0.094030	-0.100789	-0.345829
0.114551	0.023986	-0.001361	-0.277100
-0.300306	0.072942	0.115326	-0.023915
-0.116306	0.036945	0.010068	0.113700
-0.103735	-0.047987	0.029513	0.088471
-0.487735	-0.121368	0.091298	0.049480
-0.442021	-0.145109	-0.115646	0.025397
0.121408	-0.121368	-0.171646	0.029984
0.303223	-0.085397	-0.003646	-0.002126
-0.198592	-0.079641	0.195417	-0.054878
-0.632878	-0.122087	0.235463	-0.029649
-0.375735	-0.191152	-0.111075	-0.037676
0.165979	-0.239354	-0.298504	-0.057169
0.257456	-0.227843	-0.041361	-0.035383
-0.048878	-0.157339	0.085578	-0.013594
-0.029449	-0.074605	-0.043646	0.039159
0.275763	-0.039353	-0.123646	0.027691
0.109979	-0.076764	-0.065361	-0.047997
-0.339163	-0.157339	0.053541	0.016223
-0.284306	-0.210577	0.164525	0.215764
0.153408	-0.174605	0.059262	0.238700
0.200265	-0.040792	0.006639	0.064388
-0.058021	0.134137	0.336150	0.000168
0.064265	0.253648	0.261779	-0.011300
0.514894	0.250048	-0.232218	-0.131625
0.883315	0.129098	-0.189932	-0.239300
0.915351	-0.035037	0.022649	-0.291991
0.443955	-0.143670	0.039811	-0.155680
-0.069449	-0.130720	0.159948	0.184801
-0.047735	0.012467	-0.069932	0.316682
0.011694	0.234209	-0.416218	0.245581
-0.382592	0.448752	-0.153361	0.242140
-0.565449	0.573302	0.304113	0.189388
0.029979	0.566102	0.405944	0.065535
0.617868	0.441553	0.277797	-0.013594
0.453109	0.256527	0.151939	-0.027355
0.172837	0.077982	0.129056	0.091911
0.234573	-0.042951	0.149651	0.246727
0.254024	-0.081800	0.026081	0.181361
0.093979	-0.050145	-0.096218	0.034572
0.010551	0.017506	-0.012789	0.090764
-0.029449	0.077982	-0.119075	0.093058
-0.134592	0.115418	-0.433361	-0.147662
-0.066021	0.142776	-0.408218	-0.368738
0.111122	0.184533	0.022649	-0.388211
0.100837	0.240689	0.360177	-0.194626
-0.083163	0.286045	0.281230	0.095351
-0.304878	0.283885	-0.113361	0.140076
-0.431735	0.215491	-0.404789	-0.171716
-0.279735	0.091660	-0.164789	-0.359574
0.123694	-0.056620	0.252626	-0.127043
0.314665	-0.191152	0.021504	0.159572
-0.221449	-0.288274	-0.515646	0.126315
-1.239838	-0.334318	-0.413932	-0.059460
-1.594456	-0.321368	-0.124789	-0.090388
-0.975300	-0.253023	-0.069932	0.051773
-0.224878	-0.158778	0.141642	0.016223
0.051694	-0.097627	0.270932	-0.346974
-0.005449	-0.127123	0.124479	-0.500468
-0.021449	-0.269569	0.233175	-0.073206
0.052837	-0.484677	0.244616	0.316682
-0.064878	-0.687555	-0.245932	0.081590
-0.126592	-0.791152	-0.355646	-0.250754
0.369584	-0.753742	-0.108789	-0.180880
0.804367	-0.598346	-0.161361	0.089617
0.366152	-0.389713	-0.245932	0.180214
-0.469449	-0.188274	-0.181932	-0.067478
-0.723163	-0.018490	-0.028789	-0.239300
-0.282021	0.133417	0.258346	-0.000979
0.303223	0.281725	0.205715	0.260489
0.660202	0.409155	-0.272218	0.183654
0.521759	0.463151	-0.189932	0.020810
-0.031735	0.394036	0.439124	-0.005566
-0.315163	0.203252	0.610749	0.098792
0.012837	-0.039353	0.291527	0.258195
0.318097	-0.221368	-0.058504	0.235260
0.213979	-0.253742	-0.292789	0.003608
0.177408	-0.122807	0.016928	-0.074351
0.465694	0.097420	0.563838	0.071269
0.593841	0.286765	0.281230	0.104526
0.352422	0.349400	-0.433361	0.012783
0.232285	0.270206	-0.553361	-0.005566
0.376449	0.120458	-0.191075	0.012783
0.351278	0.013907	0.172534	0.011636
0.091694	0.026866	0.134777	-0.045704
-0.012306	0.162935	-0.300789	-0.183171
-0.002021	0.358759	-0.314504	-0.249609
-0.060306	0.534425	0.180543	-0.138498
-0.111735	0.632337	0.300681	0.066682
-0.226021	0.627298	0.078713	0.229526
-0.420306	0.517146	0.020360	0.203150
-0.558592	0.319162	0.161092	0.064388
-0.541449	0.070782	0.416241	0.135489
-0.220306	-0.176764	0.280085	0.243287
0.085979	-0.375325	-0.007075	0.089617
0.020837	-0.495469	0.113038	-0.083515
-0.106021	-0.524965	0.108461	-0.081224
-0.030592	-0.474605	-0.039075	0.051773
0.197979	-0.373886	-0.080218	-0.000979
0.304367	-0.265253	-0.205932	-0.367593
0.419928	-0.186116	-0.251646	-0.490159
0.787205	-0.146548	-0.330504	-0.170571
0.799790	-0.127843	-0.442504	0.019663
-0.019163	-0.090433	-0.267646	-0.105279
-0.807683	0.005987	-0.247075	-0.149952
-0.685449	0.171574	-0.232218	0.066682
-0.064878	0.373158	0.213724	0.200856
0.162551	0.539465	0.249193	-0.029649
-0.204306	0.595620	0.093587	-0.147662
-0.429449	0.502748	0.447134	0.149250
-0.114021	0.283165	0.470017	0.368287
-0.092306	0.009587	0.119903	0.345351
-0.564306	-0.230001	0.015784	0.226085
-0.547163	-0.379641	0.028369	0.087324
0.090551	-0.437195	0.178255	0.158425
0.291781	-0.440792	0.335005	0.265076
-0.148306	-0.424246	0.027225	0.019663
-0.222592	-0.397627	-0.509932	-0.399666
0.322674	-0.345109	-0.569361	-0.550869
1.004596	-0.249425	-0.296218	-0.439758
1.462557	-0.115613	-0.114504	-0.275955
1.123589	0.018946	-0.083646	-0.132770
-0.168878	0.115418	-0.202504	-0.028502
-1.132654	0.173014	-0.308789	0.124021
-0.774592	0.239969	-0.080218	0.246727
-0.134592	0.365959	0.253770	0.087324
0.060837	0.545224	0.289239	-0.208372
0.280340	0.694972	0.283518	-0.139643
0.340980	0.704331	0.266356	0.152691
-0.258021	0.514987	0.042099	0.254755
-0.974159	0.165095	-0.153361	0.211177
-1.118971	-0.224246	-0.001361	0.190535
-0.709449	-0.513454	0.353312	0.246727
-0.203163	-0.625684	0.423106	0.278838
-0.045449	-0.578922	-0.031075	0.074709
-0.118592	-0.457339	-0.467646	-0.310319
0.087122	-0.350864	-0.287075	-0.486722
0.693383	-0.304102	0.078713	-0.306883
0.987433	-0.309138	0.075280	-0.027355
0.511461	-0.329282	-0.093932	0.088471
-0.142592	-0.324965	-0.207075	0.005902
-0.341449	-0.263814	-0.136218	-0.042263
-0.114021	-0.125685	0.027225	0.035718
0.340980	0.078702	-0.148789	-0.051438
0.695672	0.302604	-0.352218	-0.282828
0.545786	0.478990	-0.075646	-0.306883
-0.036306	0.550984	0.259491	-0.086951
-0.303735	0.503467	0.261779	0.168746
-0.175735	0.369558	0.078713	0.291452
-0.338021	0.212611	-0.077932	0.271957
-0.496878	0.093100	-0.072218	0.279984
-0.164306	0.037665	0.154227	0.339617
0.007122	0.026146	0.442557	0.252461
-0.469449	0.011747	0.598163	0.060948
-0.804262	-0.040073	0.420818	0.017370
-0.210021	-0.124965	-0.042504	0.060948
0.760889	-0.209138	-0.353361	-0.098406
1.147617	-0.260217	-0.313361	-0.384775
0.935946	-0.274605	-0.191075	-0.356138
0.508028	-0.276764	-0.143075	0.042599
-0.029449	-0.285397	-0.210504	0.230673
-0.494592	-0.273166	-0.223075	-0.011300
-0.436306	-0.171728	-0.077932	-0.210663
0.216267	0.065023	0.008925	-0.115588
0.819241	0.397636	0.020360	0.016223
0.764321	0.707211	0.105028	-0.067478
0.099694	0.855519	0.337294	-0.174007
-0.535735	0.766966	0.373907	0.035718
-0.610021	0.476830	0.039811	0.421039
-0.336878	0.113979	-0.071075	0.582737
-0.103735	-0.168130	-0.009361	0.296039
-0.024878	-0.273886	-0.027646	-0.091533
-0.024878	-0.218490	0.153083	-0.052584
0.035694	-0.096907	0.118758	0.068975
0.012837	-0.012011	-0.175075	-0.141934
-0.058021	-0.008411	-0.109932	-0.322919
-0.106021	-0.063094	0.038667	-0.162553
-0.156306	-0.119210	-0.113361	0.012783
0.013979	-0.132879	-0.228789	-0.112152
0.320385	-0.099785	-0.306504	-0.338956
0.195694	-0.053023	-0.201361	-0.265645
-0.231735	-0.029282	0.262923	0.071269
-0.296878	-0.039353	0.222877	0.144663
-0.251163	-0.058059	-0.284789	0.023104
-0.541449	-0.052303	-0.268789	0.088471
-0.676306	-0.010571	0.179399	0.152691
-0.194021	0.043424	0.420818	0.035718
0.371873	0.058543	0.402511	-0.051438
0.474848	-0.001932	0.115326	-0.014740
0.335260	-0.137915	-0.306504	0.051773
0.103122	-0.299785	-0.243646	0.157278
-0.086592	-0.412735	0.076424	0.143516
0.043694	-0.414893	0.038667	-0.092679
0.337548	-0.296188	0.023793	-0.237009
0.381026	-0.100505	0.169101	-0.078933
0.257456	0.101020	0.007782	0.158425
0.246015	0.255087	-0.226504	0.251315
0.177408	0.348680	-0.336218	0.101085
-0.084306	0.393316	-0.098504	-0.089242
0.089408	0.399076	0.480314	-0.005566
0.707113	0.358759	0.428827	0.181361
0.591553	0.270206	-0.034504	0.192828
-0.354021	0.159335	-0.057361	0.024250
-0.676306	0.079421	-0.189932	-0.185462
-0.036306	0.080141	-0.215075	-0.099551
0.458829	0.160055	0.278941	0.146957
0.292926	0.258687	0.031802	-0.035383
-0.098021	0.294684	-0.571646	-0.337810
-0.308306	0.223410	-0.271075	-0.210663
-0.342592	0.073662	0.076424	-0.042263
-0.551735	-0.074605	0.262923	0.020810
-0.735735	-0.142231	0.534090	0.098792
-0.483163	-0.111296	0.091298	-0.020474
-0.034021	-0.034318	-0.343075	-0.120170
0.089408	0.004547	0.000925	0.034572
-0.170021	-0.059497	0.135921	0.137783
-0.508306	-0.227123	-0.010504	0.177920
-0.690021	-0.442951	0.004354	0.198562
-0.702592	-0.617771	-0.103075	0.064388
-0.315163	-0.677483	-0.236789	-0.086951
0.337548	-0.601224	-0.083646	-0.149952
0.628166	-0.432879	0.060406	-0.242736
0.494298	-0.251584	-0.016218	-0.301155
0.350134	-0.124246	-0.080218	-0.224408
0.276907	-0.070289	-0.137361	-0.143080
0.197979	-0.060217	-0.285932	-0.141934
0.092837	-0.041512	-0.057361	-0.019327
-0.094592	0.024706	0.252626	0.174480
-0.340306	0.137737	0.125623	0.223792
-0.395163	0.258687	0.249193	0.281131
-0.274021	0.335721	0.372763	0.290305
-0.174592	0.333561	-0.008218	0.128608
0.194551	0.245728	-0.047075	0.058654
0.859287	0.094540	0.155372	0.102232
0.815809	-0.083958	0.212580	0.169893
-0.079735	-0.243670	0.302969	0.220351
-0.373449	-0.333598	-0.163646	-0.006713
0.308944	-0.312015	-0.601361	-0.251900
0.853566	-0.161656	-0.103075	-0.152243
0.689951	0.085901	0.361321	0.000168
0.221987	0.350120	0.230886	0.080443
-0.024878	0.540905	-0.164789	0.071269
-0.053449	0.607859	-0.501932	-0.117879
0.044837	0.559623	-0.188789	-0.174007
0.287205	0.447312	0.506630	0.085030
0.283772	0.324922	0.481459	0.316682
-0.319735	0.221250	-0.148789	0.307507
-1.035733	0.147816	-0.345361	0.182507
-1.088184	0.104619	0.000925	0.041452
-0.403163	0.086621	0.462008	0.000168
0.394756	0.072222	0.686264	0.050627
0.663635	0.029026	0.139353	-0.086951
0.369584	-0.075325	-0.611646	-0.271373
0.096265	-0.233598	-0.538504	-0.165989
0.115694	-0.395469	-0.133932	-0.078933
0.189979	-0.483238	-0.009361	-0.167135
0.251736	-0.442951	-0.023075	-0.097261
-0.005449	-0.278203	-0.041361	0.102232
-0.628306	-0.045828	0.177111	0.206590
-0.929690	0.183093	0.291527	0.153838
-0.670592	0.354439	-0.005932	-0.021621
-0.000878	0.435073	0.005496	-0.139643
0.885603	0.402676	0.353312	-0.094970
1.210546	0.243568	0.209147	0.063241
0.511461	-0.025684	-0.284789	0.172186
-0.331163	-0.335037	-0.401361	0.043746
-0.412306	-0.571728	0.066127	-0.054878
-0.109449	-0.624246	0.523793	0.199709
0.092837	-0.443670	0.265211	0.417599
0.278051	-0.086116	-0.293932	0.250168
0.259745	0.317722	-0.485932	-0.085806
-0.070592	0.620098	-0.096218	-0.209517
0.039122	0.723770	0.487179	-0.013594
0.697960	0.608579	0.554685	0.172186
0.716267	0.337161	0.163381	0.115994
0.061979	0.029745	-0.247075	-0.049144
-0.149449	-0.183958	-0.463075	-0.081224
0.127122	-0.220649	-0.168218	0.029984
0.105408	-0.081080	0.187408	0.035718
-0.167735	0.155015	-0.036789	-0.128188
-0.271735	0.368118	-0.160218	-0.084660
-0.346021	0.464591	0.089010	0.126315
-0.688878	0.417794	0.172534	0.046039
-0.791719	0.273086	0.124479	-0.198062
-0.083163	0.104619	0.116470	-0.168280
0.683086	-0.042951	0.180543	0.133195
0.575534	-0.170289	0.123335	0.270810
-0.136878	-0.300505	-0.052789	0.127461
-0.600878	-0.435037	-0.091646	0.027691
-0.430592	-0.539354	-0.107646	0.046039
-0.034021	-0.555181	-0.120218	0.047186
0.129408	-0.445109	-0.082504	-0.104133
0.092837	-0.228562	-0.275646	-0.345829
0.079122	0.020386	-0.345361	-0.377902
0.066551	0.209011	0.134777	-0.145371
-0.005449	0.278126	0.354456	-0.018181
-0.136878	0.227730	0.086722	0.002461
-0.218021	0.104619	-0.058504	0.122874
-0.116306	-0.026404	-0.162504	0.132049
0.072265	-0.115613	-0.175075	0.083884
0.052837	-0.152303	0.079857	0.211177
-0.286592	-0.153742	0.212580	0.235260
-0.483163	-0.145109	0.098163	-0.012447
-0.263735	-0.135037	0.005496	-0.114443
-0.016878	-0.114174	0.008925	0.070122
0.115694	-0.076044	0.108461	0.135489
0.395900	-0.027843	0.197706	-0.051438
0.487434	0.006707	0.171390	-0.111006
0.176265	0.002388	0.040955	0.043746
0.080265	-0.043670	-0.087075	0.064388
0.295214	-0.103382	0.059262	-0.021621
0.255168	-0.127843	0.068415	0.001315
0.113408	-0.078202	-0.411646	0.007049
0.307800	0.044864	-0.577361	-0.130479
0.386747	0.195332	-0.063075	-0.262209
-0.086592	0.311243	0.408232	-0.075497
-0.391735	0.350840	0.416241	0.325856
-0.160878	0.315563	0.291527	0.398104
0.033408	0.245008	0.180543	0.101085
0.079122	0.189573	-0.002504	0.008195
0.370729	0.167254	0.022649	0.291452
0.788349	0.158615	0.119903	0.379755
0.590408	0.119738	-0.000218	0.099939
-0.299163	0.031185	0.044388	-0.019327
-0.790579	-0.078202	0.151939	0.088471
-0.182592	-0.138634	-0.129361	-0.029649
0.631598	-0.086835	-0.257361	-0.318337
0.755168	0.083741	-0.163646	-0.455794
0.556083	0.304044	-0.210504	-0.391648
0.402765	0.466750	0.063838	-0.124752
0.049408	0.489789	0.162237	0.088471
-0.691163	0.370998	-0.291646	0.103379
-1.179405	0.187413	-0.321361	0.133195
-0.813384	0.038385	0.100452	0.118287
-0.235163	-0.015611	0.316699	0.038012
-0.115163	0.013907	0.280085	0.056361
-0.397449	0.048464	0.140497	0.121728
-0.693449	0.009587	0.051253	0.113700
-0.813384	-0.130720	0.100452	0.095351
-0.666021	-0.331440	0.157660	0.118287
-0.186021	-0.524965	0.189696	0.080443
0.342125	-0.661656	0.153083	-0.067478
0.560660	-0.727843	-0.107646	-0.209517
0.437090	-0.728562	-0.426504	-0.119025
0.311232	-0.665253	-0.527075	0.019663
0.281484	-0.534318	0.013496	-0.088097
0.273475	-0.336476	0.594731	-0.279391
0.478280	-0.094749	0.272076	-0.237009
0.812376	0.147816	-0.183075	0.070122
0.900477	0.340761	-0.319075	0.127461
0.390180	0.457391	-0.464218	-0.122461
-0.211163	0.504907	-0.171646	-0.013594
-0.078592	0.507787	0.156516	0.296039
0.268898	0.489789	0.027225	0.226085
-0.031735	0.463151	0.141642	0.032278
-0.590592	0.432193	0.426539	0.091911
-0.620306	0.401236	0.318987	0.224939
-0.255735	0.370998	0.189696	0.176773
0.021979	0.332841	0.135921	0.033425
0.191122	0.260127	-0.068789	0.020810
0.278051	0.121178	0.052397	0.146957
0.246015	-0.091871	0.148507	0.098792
0.021979	-0.337915	-0.253932	-0.093824
-0.274021	-0.531440	-0.473361	-0.078933
-0.231735	-0.583958	-0.316789	-0.050291
0.075694	-0.451584	0.072992	-0.113297
0.178551	-0.168850	0.503198	-0.034236
-0.174592	0.158615	0.270932	-0.044557
-0.358592	0.400516	-0.244789	-0.287409
0.156837	0.471790	-0.186504	-0.367593
0.652193	0.369558	-0.009361	-0.151098
0.459974	0.158615	0.006639	0.138929
-0.061449	-0.073886	0.083289	0.271957
-0.605449	-0.255181	-0.033361	0.163012
-1.141776	-0.339353	-0.139646	0.109113
-0.977580	-0.306979	0.018072	0.176773
0.093979	-0.176044	-0.018504	0.027691
0.820385	-0.009851	-0.220789	-0.275955
0.490866	0.108219	-0.244789	-0.354992
0.077979	0.108939	-0.259646	-0.233572
0.148837	-0.015611	-0.130504	-0.088097
-0.016878	-0.196908	0.091298	0.019663
-0.608878	-0.326404	0.028369	0.065535
-0.740306	-0.317771	0.040955	0.154984
-0.309449	-0.160217	0.235463	0.174480
-0.224878	0.075102	0.162237	-0.054878
-0.412306	0.268766	0.106173	-0.216390
-0.133449	0.320602	0.345303	-0.052584
0.226564	0.189573	0.340726	0.130902
0.067694	-0.083238	-0.035646	0.137783
-0.119735	-0.390433	-0.381932	0.102232
-0.002021	-0.617051	-0.307646	0.128608
-0.031735	-0.691152	0.091298	0.141223
-0.136878	-0.607699	0.267500	0.089617
0.196837	-0.418490	-0.119075	-0.014740
0.627022	-0.188994	-0.528218	-0.172862
0.560660	0.024706	-0.172789	-0.225554
0.374161	0.191013	0.343015	-0.089242
0.485145	0.304044	0.241184	0.072416
0.573246	0.365239	0.012354	0.129755
0.241438	0.378918	0.081001	0.075856
-0.197449	0.359479	0.375051	0.148104
-0.094592	0.329241	0.391070	0.344205
0.394756	0.313403	-0.097361	0.251315
0.533200	0.318442	-0.345361	-0.119025
0.196837	0.331401	-0.009361	-0.337810
0.096265	0.327082	0.276653	-0.151098
0.585832	0.288205	0.126767	0.203150
0.614436	0.219090	-0.236789	0.240994
-0.408878	0.149976	-0.308789	-0.034236
-0.976440	0.118298	0.047820	-0.112152
-0.075163	0.143496	0.322420	0.083884
0.783772	0.209731	0.101596	0.154984
0.270042	0.273806	-0.388789	-0.046850
-0.675163	0.289645	-0.301932	-0.129334
-0.685449	0.237809	0.373907	0.124021
-0.235163	0.135577	0.471161	0.263929
-0.292306	0.019666	-0.101932	0.013929
-0.414592	-0.081800	-0.368218	-0.270227
-0.165449	-0.160936	-0.131646	-0.249609
0.025408	-0.229282	0.201138	0.041452
-0.045449	-0.289713	0.102740	0.226085
-0.268306	-0.332159	-0.359075	-0.000979
-0.528878	-0.347267	-0.297361	-0.298864
-0.416878	-0.330001	0.181687	-0.287409
0.184265	-0.288274	0.201138	-0.160262
0.718555	-0.236476	-0.195646	-0.217535
0.645328	-0.193310	-0.593361	-0.436321
-0.019163	-0.171008	-0.391075	-0.452358
-0.509449	-0.160936	0.361321	-0.058314
-0.402021	-0.140073	0.365898	0.306360
-0.508306	-0.087555	-0.429932	0.321269
-0.970739	-0.006972	-0.725932	0.088471
-0.822506	0.073662	-0.122504	-0.089242
-0.059163	0.111099	0.635921	0.056361
0.235717	0.067902	0.665669	0.271957
-0.164306	-0.068130	-0.023075	0.137783
-0.453449	-0.270289	-0.369361	-0.143080
-0.195163	-0.469569	0.140497	-0.101843
0.351278	-0.584677	0.702282	0.143516
0.828395	-0.569569	0.434548	0.175627
0.988578	-0.443670	-0.373932	-0.043410
0.651049	-0.276764	-0.575075	-0.139643
0.259745	-0.131440	-0.093932	-0.012447
0.343269	-0.019929	0.189696	0.064388
0.604138	0.089501	0.044388	0.001315
0.521759	0.229169	-0.361361	-0.106424
0.204837	0.401236	-0.522504	-0.145371
0.194551	0.574742	-0.029932	-0.059460
0.479424	0.707931	0.387637	0.002461
0.350134	0.764807	0.250337	0.034572
-0.207735	0.730249	0.078713	0.107966
-0.358592	0.617938	0.039811	0.085030
0.100837	0.471070	-0.055075	0.000168
0.289493	0.339321	-0.180789	0.024250
-0.320878	0.245008	-0.193361	0.071269
-0.879518	0.175894	-0.115646	0.007049
-0.804262	0.099580	0.102740	-0.065187
-0.599735	0.003828	0.299536	-0.026208
-0.429449	-0.103382	0.063838	0.004755
-0.264878	-0.201944	-0.107646	-0.017034
-0.264878	-0.281080	0.141642	-0.028502
-0.315163	-0.342231	0.121047	-0.058314
-0.274021	-0.396908	-0.034504	-0.046850
-0.235163	-0.456620	-0.079075	-0.090388
-0.208878	-0.525685	-0.488218	-0.235863
-0.118592	-0.586835	-1.004745	-0.311464
-0.100306	-0.605541	-0.858504	-0.412266
-0.070592	-0.550145	-0.147646	-0.562324
-0.011163	-0.417771	0.471161	-0.477558
-0.255735	-0.241512	0.464296	-0.218681
-0.512878	-0.073886	-0.143075	-0.154534
-0.430592	0.046304	-0.530504	-0.175153
-0.324306	0.099580	-0.204789	0.010489
-0.443163	0.084461	0.262923	0.240994
-0.410021	-0.007692	0.180543	0.270810
-0.229449	-0.177483	-0.033361	0.220351
-0.434021	-0.399785	0.091298	0.258195
-0.809963	-0.609138	0.159948	0.298333
-0.570021	-0.723526	0.091298	0.226085
0.289493	-0.694030	0.197706	0.038012
0.940523	-0.536476	0.218301	-0.214099
1.068669	-0.328562	0.106173	-0.328647
1.130454	-0.163814	0.122191	-0.081224
1.090408	-0.094749	-0.164789	0.192828
0.506884	-0.093310	-0.481361	0.110260
0.071122	-0.068130	-0.314504	-0.111006
0.433658	0.067902	-0.113361	-0.167135
0.822674	0.328522	0.111893	-0.022768
0.854710	0.645296	0.233175	0.057507
0.800935	0.908075	-0.027646	0.013929
0.399333	1.033731	0.106173	0.146957
-0.238592	1.009411	0.447134	0.336177
-0.306021	0.882157	0.145074	0.274250
0.211694	0.723050	-0.032218	0.135489
0.545786	0.575462	0.093587	0.068975
0.334115	0.443712	-0.083646	0.067828
-0.070592	0.315563	0.002068	0.191682
-0.197449	0.192452	0.110749	0.143516
-0.334592	0.100300	-0.124789	-0.029649
-0.655735	0.068622	0.078713	0.135489
-0.595163	0.103179	0.266356	0.306360
-0.130021	0.168694	-0.066504	0.046039
-0.037449	0.204691	0.029513	-0.220972
-0.245449	0.154295	0.219445	-0.277100
-0.015735	0.001668	-0.148789	-0.310319
0.511461	-0.217051	-0.304218	-0.302301
0.623589	-0.422087	-0.338504	-0.334374
0.205979	-0.532879	-0.611646	-0.382484
-0.301449	-0.506979	-0.439075	-0.286264
-0.555163	-0.358059	0.038667	-0.210663
-0.519735	-0.142231	0.008925	-0.214099
-0.448878	0.070062	-0.204789	-0.106424
-0.554021	0.214771	-0.129361	0.013929
-0.671735	0.259407	-0.211646	-0.053731
-0.576878	0.201092	-0.250504	-0.108715
-0.343735	0.058543	0.158804	0.035718
-0.394021	-0.144390	0.314410	0.149250
-0.894342	-0.381800	0.054685	0.089617
-1.019769	-0.614893	-0.012789	-0.106424
-0.220306	-0.786836	-0.049361	-0.306883
0.464550	-0.846548	-0.209361	-0.188899
0.160265	-0.778922	-0.223075	0.113700
-0.325449	-0.624246	-0.233361	0.031131
-0.312878	-0.453023	-0.159075	-0.273664
-0.212306	-0.328562	0.068415	-0.207226
-0.112878	-0.273886	-0.016218	0.032278
0.225420	-0.269569	0.002068	0.058654
0.524047	-0.268850	0.210291	-0.074351
0.370729	-0.224246	-0.146504	-0.185462
0.218555	-0.122087	-0.426504	-0.116734
0.607571	0.009587	-0.133932	-0.081224
0.774619	0.116139	0.003211	-0.212954
0.307800	0.161495	-0.057361	-0.127043
0.053979	0.155015	-0.154504	0.107966
0.060837	0.145656	-0.189932	0.086177
-0.350592	0.193172	0.158804	0.036865
-0.732306	0.323482	0.212580	0.119434
-0.333449	0.502028	-0.217361	0.101085
0.327250	0.636657	-0.239075	-0.023915
0.254024	0.630897	-0.024218	-0.130479
-0.343735	0.439393	0.064983	-0.060605
-0.436306	0.103179	0.349880	0.137783
-0.056878	-0.262375	0.539811	0.126315
-0.069449	-0.513454	0.289239	0.001315
-0.291163	-0.558059	0.038667	0.071269
0.024265	-0.401224	-0.144218	0.077003
0.652193	-0.152303	-0.435646	-0.208372
0.744871	0.041265	-0.360218	-0.337810
0.353566	0.074382	-0.223075	-0.206081
0.140837	-0.053742	-0.329361	-0.096115
0.111122	-0.235037	-0.290504	0.004755
-0.277449	-0.319929	-0.160218	0.059801
-0.798561	-0.199785	0.060406	0.093058
-0.636306	0.116139	0.258346	0.088471
-0.014592	0.493388	0.130200	-0.114443
0.386747	0.746088	0.060406	-0.360720
0.548074	0.737449	0.175967	-0.314901
0.482857	0.454511	0.078713	-0.021621
-0.071735	0.013907	-0.064218	0.206590
-0.741449	-0.396908	-0.154504	0.190535
-0.942232	-0.612735	-0.331646	0.085030
-0.734592	-0.573167	-0.199075	0.067828
-0.255735	-0.347987	0.217157	-0.050291
0.397045	-0.087555	0.162237	-0.416848
0.662491	0.065743	-0.181932	-0.587524
0.414207	0.052064	-0.300789	-0.285119
0.128265	-0.083238	-0.298504	0.029984
-0.205449	-0.231440	-0.111075	0.125168
-0.582592	-0.294030	0.114182	0.165305
-0.583735	-0.241512	-0.011646	0.189388
-0.164306	-0.115613	-0.212789	0.086177
0.051694	0.009587	-0.176218	-0.125898
-0.096878	0.079421	-0.031075	-0.223263
-0.206592	0.084461	0.129056	-0.076642
-0.199735	0.048464	0.027225	-0.011300
-0.200878	-0.000492	-0.081361	-0.175153
-0.066021	-0.053742	0.244616	-0.146516
0.156837	-0.117771	0.209147	0.125168
0.067694	-0.200505	-0.323646	0.251315
-0.172306	-0.284677	-0.352218	0.077003
-0.170021	-0.330001	0.000925	-0.193481
-0.050021	-0.304102	0.123335	-0.216390
0.240294	-0.206979	-0.002504	-0.088097
0.758601	-0.079641	-0.083646	-0.159116
0.848990	0.024706	0.023793	-0.245027
0.095122	0.076542	0.142786	-0.089242
-0.467163	0.083741	0.124479	0.190535
-0.063735	0.085181	-0.207075	0.322416
0.119122	0.116858	-0.516789	0.219205
-0.349449	0.184533	-0.329361	-0.014740
-0.374592	0.255087	0.218301	-0.114443
0.114551	0.277406	0.581001	0.050627
0.140837	0.225570	0.252626	0.096498
-0.205449	0.121178	-0.447075	-0.200353
-0.021449	0.018946	-0.389932	-0.335520
0.369584	-0.038634	0.308690	-0.014740
0.308944	-0.044389	0.378484	0.243287
-0.044306	-0.036476	-0.136218	0.140076
-0.452306	-0.056620	-0.410504	-0.102988
-0.781449	-0.113454	-0.201361	-0.210663
-0.406592	-0.168850	0.230886	-0.130479
0.637319	-0.167411	0.383060	-0.057169
0.981713	-0.089713	-0.163646	-0.147662
0.120265	0.021826	-0.721361	-0.263354
-0.581449	0.091660	-0.379646	-0.144225
-0.251163	0.073662	0.127912	0.066682
0.041408	-0.019929	0.202282	0.122874
-0.300306	-0.127843	0.237751	0.085030
-0.469449	-0.184677	-0.067646	-0.037676
-0.196306	-0.152303	-0.288218	-0.114443
0.135122	-0.037915	0.109605	-0.030795
0.274619	0.105339	0.221733	0.019663
0.040265	0.193892	0.032946	0.103379
-0.323163	0.163655	0.109605	0.226085
-0.450021	0.005267	0.039811	0.181361
-0.380306	-0.213454	-0.192218	0.027691
-0.312878	-0.383238	-0.107646	-0.167135
0.079122	-0.422807	0.022649	-0.407684
0.819241	-0.326404	-0.029932	-0.382484
0.977136	-0.160217	-0.099646	0.003608
0.189979	-0.014171	-0.320218	0.168746
-0.538021	0.054943	-0.393361	-0.050291
-0.453449	0.050624	0.022649	-0.111006
-0.086592	0.025426	0.170246	0.033425
0.129408	0.031905	-0.075646	-0.013594
0.411919	0.085181	0.026081	-0.217535
0.517182	0.160055	0.169101	-0.261064
0.036837	0.217650	0.124479	0.063241
-0.418021	0.231329	0.083289	0.410718
-0.408878	0.195332	-0.151075	0.180214
-0.330021	0.122618	-0.136218	-0.240445
-0.120878	0.031905	0.153083	-0.180880
0.274619	-0.063814	0.194273	0.216911
0.226564	-0.151584	-0.101932	0.379755
-0.512878	-0.211296	-0.489361	0.059801
-0.984422	-0.213454	-0.449361	-0.259918
-0.326592	-0.146548	0.138209	-0.232427
0.631598	-0.040073	0.551253	-0.149952
0.895900	0.038385	0.227454	-0.271373
0.588120	0.027586	-0.185361	-0.270227
0.066551	-0.076764	-0.245932	0.011636
-0.525449	-0.200505	-0.196789	0.247874
-0.669449	-0.245109	-0.119075	0.231819
-0.095735	-0.158059	0.079857	-0.046850
0.492010	0.020386	0.260635	-0.257627
0.599562	0.182373	0.082145	-0.174007
0.291781	0.234929	-0.130504	-0.022768
0.021979	0.166535	-0.157932	-0.065187
-0.150592	0.044864	-0.218504	-0.143080
-0.430592	-0.037915	-0.043646	0.043746
-0.330021	-0.031440	0.024937	0.253608
0.202551	0.045584	-0.468789	0.142370
0.089408	0.121178	-0.468789	-0.051438
-0.727735	0.134137	0.150795	-0.144225
-0.910305	0.072222	0.280085	-0.183171
-0.149449	-0.023526	0.055829	-0.136207
0.467983	-0.097627	-0.140789	-0.179735
0.251736	-0.120649	-0.260789	-0.288555
-0.434021	-0.108418	0.163381	-0.088097
-0.849872	-0.101224	0.490612	0.206590
-0.714021	-0.132879	0.015784	0.130902
-0.375735	-0.204102	-0.260789	-0.070915
-0.183735	-0.293310	-0.020789	-0.113297
-0.037449	-0.376764	0.053541	-0.077787
0.334115	-0.440792	0.046676	-0.021621
0.441667	-0.480361	-0.169361	-0.082369
-0.187163	-0.489713	-0.519075	-0.235863
-0.648878	-0.461656	-0.289361	-0.138498
-0.118592	-0.388994	0.035234	0.046039
0.419928	-0.266692	-0.013932	0.019663
0.241438	-0.109857	-0.007075	-0.060605
-0.120878	0.044864	0.040955	-0.038823
-0.236306	0.152856	0.063838	0.122874
-0.029449	0.193892	-0.036789	0.164159
0.362720	0.180933	-0.232218	-0.109861
0.616724	0.139177	-0.081361	-0.258773
0.354710	0.084461	0.269788	-0.031942
-0.120878	0.021826	0.434548	0.196269
-0.172306	-0.035756	0.420818	0.258195
-0.200878	-0.054461	0.131344	0.261636
-0.550592	-0.003372	-0.091646	0.238700
-0.197449	0.111099	0.066127	0.192828
0.950820	0.230609	0.077568	0.073562
1.204825	0.273086	-0.131646	-0.120170
0.441667	0.187413	-0.152218	-0.308028
0.313520	-0.004812	-0.009361	-0.297719
0.646472	-0.199066	0.068415	0.052920
0.157979	-0.260936	-0.106504	0.417599
-0.574592	-0.109138	-0.217361	0.423333
-0.451163	0.225570	0.064983	0.210030
0.004837	0.606419	0.242328	0.005902
0.209408	0.862719	0.164525	-0.104133
0.597273	0.875678	0.199994	-0.204935
0.903910	0.639537	0.304113	-0.350411
0.485145	0.264447	0.289239	-0.298864
0.023122	-0.082519	-0.036789	0.019663
0.105408	-0.260217	-0.529361	0.306360
-0.124306	-0.224246	-0.721361	0.378608
-0.950214	-0.040792	-0.485932	0.253608
-1.291149	0.165815	0.122191	0.043746
-0.720878	0.282445	0.550108	-0.133916
-0.171163	0.266606	0.051253	-0.318337
-0.183735	0.155015	-0.410504	-0.419139
-0.079735	0.021106	0.059262	-0.348120
0.185408	-0.078202	0.489468	-0.187753
-0.066021	-0.144390	0.332717	0.040306
-0.413449	-0.225685	0.059262	0.211177
-0.202021	-0.366692	-0.241361	0.121728
-0.029449	-0.558059	-0.488218	-0.039970
-0.301449	-0.725684	-0.549932	-0.028502
-0.300306	-0.776764	-0.508789	-0.047997
-0.079735	-0.658059	-0.151075	-0.237009
-0.355163	-0.399785	0.282374	-0.369884
-0.622592	-0.098346	0.274365	-0.242736
-0.107163	0.138457	0.062694	0.010489
0.594985	0.241409	-0.129361	-0.026208
0.484001	0.207571	-0.109932	-0.220972
0.057408	0.075822	0.244616	-0.058314
0.095122	-0.100505	0.260635	0.370581
-0.077449	-0.265972	-0.067646	0.534571
-0.779163	-0.373886	-0.082504	0.341911
-0.983281	-0.385397	0.015784	0.101085
-0.334592	-0.286836	0.125623	0.039159
0.519470	-0.105541	0.297248	-0.010153
0.998875	0.090221	0.083289	-0.237009
0.861575	0.213331	-0.143075	-0.300010
0.350134	0.208291	0.165669	-0.020474
0.148837	0.083021	0.289239	0.199709
0.368440	-0.087555	-0.199075	0.168746
0.401621	-0.194749	-0.519075	0.065535
0.297502	-0.166692	-0.440218	-0.049144
0.445099	0.001668	-0.339646	-0.163698
0.431369	0.250768	-0.050504	-0.179735
0.093979	0.495548	0.125623	-0.227845
-0.078592	0.666175	0.089010	-0.245027
-0.075163	0.730249	0.442557	0.038012
-0.255735	0.693532	0.577568	0.285718
-0.348306	0.586981	-0.008218	0.221498
0.015122	0.438673	-0.380789	0.132049
0.064265	0.257967	-0.116789	0.173333
-0.643163	0.045584	0.270932	0.297186
-1.060818	-0.177483	0.304113	0.384342
-0.688878	-0.360217	0.013496	0.177920
-0.428306	-0.450864	-0.146504	-0.277100
-0.421449	-0.430720	0.020360	-0.510777
0.231141	-0.335756	0.214868	-0.297719
1.167067	-0.235756	0.022649	-0.050291
1.030912	-0.201224	-0.583075	-0.194626
-0.203163	-0.259497	-0.728218	-0.354992
-0.966178	-0.373167	-0.083646	-0.120170
-0.429449	-0.456620	0.267500	0.082737
0.359287	-0.423526	-0.067646	-0.139643
0.386747	-0.241512	-0.505361	-0.442049
0.007122	0.041984	-0.485932	-0.396230
-0.203163	0.318442	0.115326	0.024250
-0.276306	0.481149	0.443701	0.308654
-0.519735	0.473950	0.278941	0.282278
-0.658021	0.304763	0.119903	0.253608
-0.507163	0.036945	0.010068	0.245581
-0.251163	-0.239354	0.131344	0.174480
0.207122	-0.437195	0.245761	0.028838
0.517182	-0.508418	0.072992	-0.068624
0.130551	-0.461656	-0.055075	-0.017034
-0.342592	-0.347987	-0.067646	-0.049144
-0.102592	-0.226404	0.056973	-0.050291
0.400477	-0.129282	-0.010504	0.111406
0.263177	-0.064533	-0.280218	0.115994
0.034551	-0.025684	-0.091646	-0.104133
0.383315	-0.001932	0.285806	-0.228990
0.628166	0.019666	0.174822	-0.061751
0.431369	0.056383	-0.242504	0.067828
0.384459	0.116139	-0.401361	-0.078933
0.432514	0.198932	-0.192218	-0.115588
-0.018021	0.289645	0.071848	0.104526
-0.374592	0.366678	0.186264	0.177920
-0.020306	0.406275	0.233175	-0.018181
0.073408	0.398356	0.344159	-0.015887
-0.263735	0.350840	0.169101	0.327003
-0.110592	0.287485	-0.096218	0.487553
0.256312	0.227730	0.181687	0.199709
0.099694	0.170134	0.216012	-0.183171
-0.142592	0.096700	-0.203646	-0.144225
0.256312	-0.009851	-0.056218	0.199709
0.639607	-0.139353	0.220589	0.089617
0.139694	-0.243670	-0.025361	-0.348120
-0.332306	-0.260936	-0.231075	-0.312610
-0.004306	-0.158059	-0.216218	0.082737
0.313520	0.045584	-0.192218	0.154984
0.043694	0.274526	-0.069932	-0.106424
-0.102592	0.432913	-0.023075	-0.303446
0.101979	0.445872	-0.023075	-0.226699
0.106551	0.301884	-0.004789	-0.039970
-0.027163	0.071502	-0.107646	-0.026208
-0.027163	-0.130001	-0.067646	-0.028502
-0.178021	-0.205541	-0.044789	0.110260
-0.757449	-0.133598	-0.025361	0.212324
-0.985562	0.025426	0.376195	0.176773
-0.404306	0.162215	0.400223	0.046039
-0.100306	0.182373	-0.124789	0.017370
-0.450021	0.052064	-0.338504	0.098792
-0.461449	-0.182519	-0.365932	-0.061751
-0.104878	-0.424965	-0.301932	-0.309173
-0.060306	-0.585397	0.015784	-0.316046
-0.088878	-0.625684	0.148507	-0.237009
0.199122	-0.562375	0.030658	-0.177444
0.116837	-0.444389	0.067271	-0.058314
-0.495735	-0.314174	0.054685	0.020810
-0.546021	-0.194749	-0.219646	-0.044557
0.098551	-0.094749	-0.304218	-0.128188
0.442811	-0.026404	-0.080218	-0.188899
0.193408	-0.012731	0.148507	-0.180880
-0.002021	-0.066692	0.134777	-0.030795
-0.064878	-0.166692	-0.151075	0.101085
-0.143735	-0.251584	-0.351075	0.073562
-0.095735	-0.258059	-0.079075	0.089617
-0.061449	-0.163095	0.317843	0.289159
-0.077449	-0.007692	0.139353	0.363700
0.023122	0.129098	-0.241361	0.126315
0.161408	0.178054	-0.210504	-0.165989
0.224276	0.131977	0.032946	-0.269082
0.377594	0.039105	0.363610	-0.125898
0.677365	-0.031440	0.537523	0.133195
0.430225	-0.029282	0.097019	0.227232
-0.438592	0.050624	-0.291646	0.154984
-0.662592	0.169414	0.038667	0.114847
0.050551	0.273806	0.402511	0.082737
0.643040	0.315563	0.281230	0.002461
0.824962	0.269486	-0.067646	-0.051438
0.747159	0.145656	-0.263075	-0.006713
0.152265	-0.005532	-0.144218	0.089617
-0.508306	-0.106260	0.039811	0.106819
-0.287735	-0.086835	0.064983	0.091911
0.391324	0.062143	0.016928	0.127461
0.414207	0.271646	-0.031075	0.082737
0.124837	0.434353	0.064983	-0.070915
0.376449	0.468910	0.205715	-0.165989
0.637319	0.368838	-0.027646	-0.125898
0.263177	0.203252	-0.354504	-0.026208
-0.055735	0.075102	-0.164789	0.056361
0.035694	0.057103	0.135921	0.132049
-0.253449	0.152856	0.194273	0.215764
-0.796280	0.292524	0.277797	0.198562
-0.538021	0.381797	0.032946	-0.125898
0.175122	0.357319	-0.221932	-0.400812
0.442811	0.224850	0.113038	-0.203790
0.366152	0.039825	0.210291	0.055214
0.021979	-0.130720	-0.128218	0.072416
-0.661449	-0.240073	-0.213932	-0.010153
-1.018629	-0.277483	-0.248218	-0.143080
-0.450021	-0.258778	-0.217361	-0.130479
0.329539	-0.214893	-0.138504	0.067828
0.235717	-0.178203	-0.399075	0.012783
-0.404306	-0.168130	-0.351075	-0.203790
-0.662592	-0.182519	0.220589	-0.180880
-0.628306	-0.196188	0.521504	-0.021621
-0.347163	-0.185397	0.432259	0.046039
0.223132	-0.148706	0.092443	0.029984
0.342125	-0.114174	-0.323646	0.032278
-0.182592	-0.117771	-0.191075	0.091911
-0.317449	-0.181800	0.195417	0.035718
0.068837	-0.292591	-0.048218	-0.149952
0.149979	-0.406979	-0.501932	-0.256482
0.169408	-0.468850	-0.316789	-0.233572
0.482857	-0.434318	0.092443	-0.104133
0.159122	-0.291872	0.174822	0.140076
-0.718592	-0.071728	-0.111075	0.213471
-0.683163	0.162215	-0.424218	-0.088097
0.099694	0.329961	-0.035646	-0.248463
0.418784	0.376038	0.503198	-0.092679
0.453109	0.289645	0.387637	-0.000979
0.708257	0.109659	0.094731	0.031131
0.295214	-0.088274	-0.208218	0.080443
-0.858994	-0.217771	-0.409361	0.130902
-0.837329	-0.225685	-0.048218	0.222645
0.434802	-0.120649	0.286951	0.212324
0.678509	0.030465	0.167957	0.128608
-0.292306	0.135577	0.056973	0.176773
-0.580306	0.144216	0.061550	0.173333
-0.011163	0.077982	0.130200	-0.034236
0.366152	0.010307	0.138209	-0.228990
0.643040	0.002388	-0.027646	-0.196917
1.183086	0.049184	-0.100789	-0.093824
1.106427	0.092380	0.148507	-0.088097
0.235717	0.083021	0.143930	-0.065187
-0.278592	0.036945	-0.300789	0.086177
-0.202021	0.024706	-0.423075	0.292599
-0.229449	0.114699	-0.328218	0.205443
-0.440878	0.311243	-0.127075	-0.115588
-0.220306	0.539465	0.538667	-0.122461
0.133979	0.681293	0.597019	0.072416
-0.268306	0.646736	-0.113361	0.065535
-0.695735	0.432193	-0.292789	-0.141934
-0.150592	0.126218	0.045532	-0.325210
0.505740	-0.154461	0.133632	-0.137352
0.352422	-0.334318	-0.243646	0.153838
-0.091163	-0.410577	-0.575075	-0.002126
-0.324306	-0.424965	-0.265361	-0.265645
-0.820226	-0.408418	0.338438	-0.056023
-1.274045	-0.356620	0.505486	0.323562
-0.781449	-0.246548	0.126767	0.273104
0.007122	-0.081080	-0.243646	-0.059460
0.068837	0.085901	-0.199075	-0.168280
0.085979	0.160055	0.178255	-0.036529
0.592697	0.062863	0.540955	0.138929
0.490866	-0.212015	0.251481	0.072416
-0.389449	-0.568130	-0.408218	-0.234718
-0.228306	-0.839353	-0.412789	-0.336665
0.990866	-0.870289	0.137065	-0.062896
1.219683	-0.605541	0.212580	0.220351
0.366152	-0.132879	-0.465361	0.094205
-0.115163	0.355879	-0.868789	-0.273664
-0.115163	0.674094	-0.301932	-0.287409
-0.152878	0.741768	0.402511	0.074709
0.017408	0.612179	0.598163	0.309801
0.315809	0.412035	0.278941	0.182507
-0.157449	0.260127	-0.063075	-0.012447
-0.967318	0.209011	0.288095	0.159572
-0.524306	0.238529	0.667957	0.417599
0.581255	0.275966	0.380772	0.347645
0.567525	0.237809	-0.104218	0.057507
-0.146021	0.080861	-0.399075	-0.156825
0.004837	-0.165972	-0.235646	-0.098406
0.529768	-0.408418	0.109605	0.085030
0.077979	-0.537915	-0.155646	-0.013594
-0.600878	-0.489713	-0.485932	-0.264500
-0.023735	-0.272447	-0.360218	-0.341247
0.940523	0.037665	-0.130504	-0.262209
0.741438	0.323482	0.029513	-0.162553
-0.088878	0.486189	0.031802	-0.190044
-0.482021	0.484029	0.029513	-0.204935
-0.397449	0.354439	0.116470	-0.064042
-0.229449	0.193172	0.171390	0.119434
-0.035163	0.086621	0.108461	0.214617
-0.164306	0.060703	-0.211646	0.204296
-0.701449	0.071502	-0.202504	0.117140
-0.836189	0.047744	0.582145	0.136636
-0.370021	-0.050864	0.680543	0.219205
-0.312878	-0.212015	-0.194504	0.210030
-0.614592	-0.385397	-0.681361	0.042599
-0.219163	-0.513454	-0.623075	-0.282828
0.490866	-0.558778	-0.056218	-0.336665
0.573246	-0.523526	0.639353	-0.109861
0.151122	-0.448706	0.344159	-0.093824
-0.108306	-0.371008	-0.455075	-0.239300
0.071122	-0.290433	-0.505361	-0.228990
0.652193	-0.171008	0.008925	-0.065187
0.979424	0.002388	0.348735	0.160718
0.405054	0.185973	-0.017361	0.121728
-0.352878	0.301884	-0.656218	-0.302301
-0.128878	0.302604	-0.443646	-0.447776
0.498875	0.218370	0.219445	-0.098406
0.266610	0.137017	0.275509	0.188241
-0.288878	0.138457	-0.088218	0.112553
-0.379163	0.239969	-0.281361	-0.061751
-0.552878	0.390437	-0.001361	0.010489
-0.855573	0.497708	0.637065	0.354526
-0.607735	0.476830	0.768644	0.583884
-0.349449	0.293244	-0.021932	0.324709
-0.598592	-0.012011	-0.567075	-0.113297
-0.310592	-0.340073	-0.243646	-0.165989
0.556083	-0.591152	0.305257	0.128608
0.453109	-0.710577	0.439124	0.214617
-0.315163	-0.701224	-0.091646	-0.227845
-0.212306	-0.605541	-0.545361	-0.545141
0.500019	-0.466692	-0.338504	-0.283973
0.696816	-0.305541	0.019216	-0.102988
0.688806	-0.130720	0.053541	-0.321774
0.848990	0.045584	-0.196789	-0.413412
0.433658	0.198932	-0.447075	-0.084660
-0.276306	0.312683	-0.320218	0.206590
-0.435163	0.387557	0.363610	0.160718
-0.214592	0.435073	0.599307	0.013929
-0.261449	0.458831	0.007782	0.056361
-0.343735	0.443712	-0.068789	0.306360
-0.066021	0.371718	0.314410	0.339617
-0.102592	0.242848	0.286951	0.168746
-0.516306	0.076542	0.099308	0.200856
-0.435163	-0.097627	-0.026504	0.210030
0.189979	-0.250864	-0.063075	-0.045704
0.583543	-0.361656	0.079857	-0.204935
0.474848	-0.414893	-0.051646	-0.069769
0.178551	-0.401944	-0.489361	0.047186
-0.171163	-0.319929	-0.553361	-0.088097
-0.288878	-0.172447	-0.177361	-0.333228
-0.022592	0.018226	0.269788	-0.311464
0.172837	0.203972	0.466584	-0.064042
0.071122	0.326362	0.267500	0.009342
0.031122	0.350120	-0.251646	-0.125898
0.099694	0.280285	-0.605932	-0.131625
-0.007735	0.160055	-0.306504	0.060948
-0.063735	0.037665	0.337294	0.119434
0.033408	-0.059497	0.621047	0.152691
-0.278592	-0.126404	0.252626	0.402691
-1.116691	-0.167411	-0.116789	0.578149
-1.303692	-0.176044	-0.048218	0.282278
-0.288878	-0.135037	0.230886	-0.207226
0.850134	-0.055900	0.478026	-0.245027
1.387300	0.005267	0.259491	-0.021621
1.312044	-0.030001	-0.218504	-0.011300
0.640752	-0.180361	-0.427646	-0.112152
-0.235163	-0.373167	-0.459646	-0.068624
-0.411163	-0.470289	-0.268789	0.072416
0.204837	-0.362375	-0.011646	0.001315
0.636175	-0.045109	-0.085932	-0.283973
0.521759	0.371718	-0.203646	-0.367593
0.273475	0.725210	-0.077932	-0.154534
-0.075163	0.892236	0.132488	0.077003
-0.488878	0.853360	0.262923	0.152691
-0.551735	0.676974	0.138209	0.083884
-0.199735	0.456671	0.064983	0.009342
0.147694	0.251488	0.269788	0.024250
0.234573	0.066463	0.217157	0.088471
0.021979	-0.113454	-0.201361	0.175627
-0.458021	-0.285397	-0.461932	0.154984
-0.900043	-0.409138	-0.368218	-0.012447
-0.794000	-0.435037	-0.064218	-0.068624
-0.234021	-0.347267	0.186264	0.005902
0.075694	-0.192591	0.125623	-0.114443
-0.039735	-0.060217	-0.072218	-0.392793
-0.100306	-0.020648	-0.137361	-0.432885
0.080265	-0.083958	-0.071075	-0.226699
0.227708	-0.201944	0.164525	-0.033089
0.196837	-0.303382	0.183976	-0.013594
-0.142592	-0.343670	-0.219646	-0.106424
-0.571163	-0.319210	-0.507646	-0.130479
-0.602021	-0.256620	-0.331646	-0.083515
-0.330021	-0.190433	-0.035646	-0.002126
-0.159735	-0.142951	0.029513	0.133195
-0.271735	-0.119929	0.013496	0.282278
-0.516306	-0.119210	-0.003646	0.265076
-0.621449	-0.130001	0.086722	0.059801
-0.258021	-0.144390	0.376195	-0.049144
0.511461	-0.162375	0.377339	-0.004419
0.870729	-0.196908	0.156516	0.026544
0.534344	-0.256620	0.021504	-0.112152
0.311232	-0.327123	-0.171646	-0.317192
0.652193	-0.365253	-0.245932	-0.208372
0.856999	-0.318490	-0.170504	0.097645
0.363864	-0.165253	-0.188789	0.198562
-0.172306	0.071502	-0.202504	0.151544
-0.317449	0.329961	-0.167075	0.068975
-0.247735	0.540905	-0.013932	-0.085806
0.092837	0.657535	0.260635	-0.163698
0.581255	0.664015	0.185120	-0.104133
0.649905	0.576902	0.053541	0.034572
0.284916	0.430753	0.299536	0.141223
-0.066021	0.267326	0.333861	0.128608
-0.319735	0.126218	0.114182	0.160718
-0.325449	0.033345	-0.016218	0.229526
-0.003163	-0.007692	-0.273361	0.077003
0.080265	-0.008411	-0.419646	-0.175153
-0.118592	0.008147	-0.018504	-0.174007
-0.050021	0.018946	0.340726	0.056361
-0.047735	0.013907	0.132488	0.164159
-0.550592	-0.001212	-0.227646	-0.002126
-0.693449	-0.009851	-0.235646	-0.225554
0.074551	-0.000492	0.180543	-0.144225
0.668211	0.008867	0.462008	0.093058
0.267754	-0.014171	0.105028	0.060948
-0.247735	-0.093310	-0.565932	-0.139643
-0.319735	-0.212735	-0.674504	-0.145371
-0.388306	-0.312015	-0.162504	0.007049
-0.216878	-0.326404	0.067271	-0.046850
0.200265	-0.235037	0.056973	-0.228990
0.121408	-0.081800	0.119903	-0.293137
-0.387163	0.057103	-0.034504	-0.267936
-0.367735	0.120458	-0.055075	-0.088097
0.033408	0.098860	0.145074	0.127461
-0.182592	0.020386	0.014639	0.096498
-0.517449	-0.076044	-0.132789	-0.010153
-0.139163	-0.164533	0.046676	0.081590
0.177408	-0.243670	-0.002504	0.197416
-0.174592	-0.311296	-0.237932	0.189388
-0.462592	-0.358059	-0.171646	0.094205
-0.343735	-0.362375	0.045532	-0.059460
-0.174592	-0.310577	0.213724	-0.148807
0.117979	-0.212015	0.232031	-0.149952
0.596129	-0.100505	0.023793	-0.204935
0.740294	-0.017771	-0.138504	-0.233572
0.450820	0.009587	-0.116789	-0.077787
0.130551	-0.009851	0.051253	0.173333
-0.111735	-0.032159	0.132488	0.267370
-0.389449	-0.014891	-0.104218	0.074709
-0.384878	0.057103	-0.268789	-0.128188
0.233429	0.158615	-0.073361	-0.122461
0.776907	0.246448	0.174822	-0.019327
0.581255	0.279565	0.191985	0.020810
-0.038592	0.242128	0.177111	0.034572
-0.458021	0.153576	0.113038	0.085030
-0.338021	0.062143	-0.130504	0.148104
0.247159	0.016067	-0.165932	0.219205
0.691095	0.029026	-0.020789	0.138929
0.419928	0.072942	0.039811	-0.041116
-0.069449	0.104619	0.006639	-0.000979
-0.131163	0.101740	-0.129361	0.172186
-0.100306	0.084461	-0.000218	0.222645
-0.422592	0.094540	0.367042	0.117140
-0.676306	0.154295	0.343015	-0.068624
-0.135735	0.239969	0.165669	-0.138498
0.828395	0.288925	0.095875	-0.149952
1.035488	0.245008	-0.066504	-0.256482
0.477136	0.095260	-0.129361	-0.259918
0.189979	-0.108418	-0.210504	-0.136207
0.294070	-0.273886	-0.388789	-0.104133
0.179694	-0.318490	-0.244789	-0.097261
-0.106021	-0.213454	-0.048218	0.065535
-0.315163	0.003108	-0.130504	0.249021
-0.538021	0.246448	-0.050504	0.227232
-0.640878	0.434353	0.072992	0.027691
-0.612306	0.519306	0.098163	-0.005566
-0.437449	0.487629	0.218301	0.182507
0.052837	0.350840	0.198850	0.133195
0.289493	0.137737	0.190841	-0.101843
-0.088878	-0.108418	0.163381	-0.147662
-0.437449	-0.339353	-0.115646	-0.067478
-0.215735	-0.510577	-0.276789	-0.022768
0.045979	-0.589713	-0.356789	-0.109861
-0.280878	-0.563095	-0.335075	-0.232427
-0.514021	-0.445828	-0.041361	-0.279391
-0.144878	-0.282519	0.143930	-0.342392
0.105408	-0.124246	0.045532	-0.287409
-0.167735	-0.012011	-0.220789	-0.081224
-0.408878	0.036945	-0.267646	0.019663
-0.194021	0.017506	0.005496	0.002461
0.011694	-0.062375	0.114182	0.067828
-0.092306	-0.183958	0.038667	0.215764
-0.092306	-0.317771	-0.040218	0.196269
0.009408	-0.421368	-0.056218	0.054067
-0.109449	-0.445828	0.027225	0.066682
-0.098021	-0.364533	-0.059646	0.012783
0.336404	-0.192591	-0.033361	-0.234718
0.660202	0.005267	0.307546	-0.392793
0.414207	0.149976	0.375051	-0.269082
0.316953	0.196052	0.014639	0.073562
0.588120	0.156455	-0.385361	0.288012
0.172837	0.090221	-0.464218	0.257049
-0.735735	0.065743	-0.205932	0.259342
-0.727735	0.108219	0.052397	0.324709
0.181979	0.191732	0.105028	0.202003
0.448532	0.259407	0.081001	-0.157971
-0.086592	0.270926	0.143930	-0.412266
0.034551	0.229889	0.236607	-0.265645
0.733429	0.173014	0.297248	0.041452
0.621301	0.139177	0.236607	0.097645
-0.082021	0.138457	-0.081361	-0.018181
-0.204306	0.142056	-0.360218	0.007049
0.187694	0.107499	-0.223075	0.073562
0.350134	0.020386	0.108461	-0.033089
0.061979	-0.084677	0.142786	-0.066333
-0.374592	-0.140073	-0.303075	0.085030
-0.699163	-0.094030	-0.527075	0.161865
-0.726592	0.054223	-0.049361	0.056361
-0.428306	0.246448	0.266356	-0.137352
0.141979	0.382517	0.011211	-0.267936
0.735717	0.363799	-0.069932	-0.267936
0.711690	0.157895	0.134777	-0.219827
0.037979	-0.165972	0.052397	-0.146516
-0.405449	-0.455900	-0.212789	0.008195
-0.276306	-0.565972	-0.147646	0.175627
-0.291163	-0.437915	-0.060789	0.173333
-0.724306	-0.138634	-0.130504	0.027691
-0.801982	0.173014	0.126767	0.019663
-0.262592	0.328522	0.387637	0.065535
-0.063735	0.255087	0.147362	-0.021621
-0.230592	0.005267	-0.272218	-0.128188
0.162551	-0.283958	-0.207075	-0.109861
0.724276	-0.476044	0.416241	0.067828
0.521759	-0.514174	0.534090	0.199709
-0.078592	-0.430720	-0.170504	0.230673
-0.256878	-0.307699	-0.687075	0.230673
-0.262592	-0.207699	-0.427646	0.049480
-0.278592	-0.130001	0.161092	-0.263354
0.248303	-0.036476	0.423106	-0.399666
0.998875	0.098860	0.233175	-0.279391
0.922216	0.249328	-0.194504	-0.225554
0.154551	0.364519	-0.371646	-0.311464
0.002551	0.402676	-0.114504	-0.190044
0.409630	0.358039	0.102740	0.160718
0.119122	0.252928	0.026081	0.392370
-0.608878	0.129817	-0.147646	0.325856
-0.743735	0.038385	-0.189932	0.242140
-0.602021	0.017506	-0.012789	0.302920
-0.768878	0.077982	0.282374	0.205443
-0.582592	0.184533	0.307546	-0.161407
0.271186	0.267326	0.187408	-0.351556
0.726564	0.249328	0.402511	-0.064042
0.362720	0.090221	0.325852	0.185948
-0.118592	-0.177483	-0.200218	0.067828
-0.232878	-0.456620	-0.312218	-0.064042
-0.158592	-0.635037	-0.235646	-0.046850
0.025408	-0.641512	-0.363646	0.027691
0.406198	-0.475325	-0.237932	0.003608
0.490866	-0.208418	-0.103075	-0.242736
-0.094592	0.060703	-0.316789	-0.459231
-0.588306	0.252208	-0.240218	-0.316046
-0.174592	0.340761	0.191985	-0.076642
0.497731	0.347240	0.338438	-0.041116
0.306656	0.301884	0.108461	-0.009006
-0.338021	0.224130	-0.120218	0.141223
-0.340306	0.122618	-0.076789	0.274250
-0.015735	0.010307	0.140497	0.292599
-0.300306	-0.091871	0.333861	0.286865
-0.773449	-0.161656	0.356745	0.252461
-0.442021	-0.190433	0.070703	0.063241
0.323818	-0.181800	-0.189932	-0.083515
0.421072	-0.153742	-0.196789	0.010489
0.053979	-0.127843	-0.112218	0.004755
0.115694	-0.122807	0.101596	-0.247318
0.597273	-0.145109	0.122191	-0.472977
0.697960	-0.180361	0.000925	-0.357283
0.503452	-0.196188	-0.060789	0.019663
0.446244	-0.154461	-0.346504	0.152691
0.210551	-0.032159	-0.522504	-0.005566
-0.190592	0.165815	-0.337361	-0.159116
-0.332306	0.388277	-0.039075	-0.107570
-0.179163	0.559623	0.316699	0.067828
-0.120878	0.614339	0.447134	0.144663
-0.422592	0.535145	0.219445	0.130902
-0.733449	0.366678	0.023793	0.134342
-0.445449	0.178774	0.070703	0.144663
0.121408	0.018226	0.235463	0.159572
0.187694	-0.110577	0.092443	0.094205
-0.056878	-0.235756	-0.370504	-0.074351
-0.087735	-0.377483	-0.364789	-0.147662
-0.103735	-0.514174	0.181687	-0.083515
-0.310592	-0.583238	0.332717	-0.030795
-0.363163	-0.519929	0.012354	0.017370
-0.051163	-0.314174	-0.301932	0.007049
0.283772	-0.032159	-0.449361	-0.160262
0.303223	0.209731	-0.181932	-0.224408
0.279195	0.298284	0.175967	-0.085806
0.307800	0.192452	0.202282	0.035718
0.068837	-0.047267	0.090154	-0.003272
-0.319735	-0.280361	0.036378	-0.085806
-0.140306	-0.365253	-0.089361	-0.022768
0.494298	-0.237915	-0.167075	0.090764
0.592697	0.048464	-0.087075	0.027691
0.137408	0.350120	-0.072218	-0.172862
-0.269449	0.514267	0.148507	-0.099551
-0.394021	0.460991	0.427683	0.230673
-0.364306	0.233489	0.022649	0.361406
-0.243163	-0.032879	-0.575075	0.168746
0.035694	-0.193310	-0.399075	-0.106424
0.356999	-0.188274	0.121047	-0.233572
0.332971	-0.066692	0.378484	-0.085806
0.012837	0.061423	0.330429	0.164159
-0.264878	0.106059	-0.139646	0.079296
-0.568878	0.059983	-0.261932	-0.190044
-0.565449	-0.014891	0.281230	-0.190044
0.188837	-0.044389	0.285806	-0.065187
0.842125	-0.013451	-0.315646	-0.074351
0.512605	0.026146	-0.434504	-0.219827
-0.226021	0.002388	-0.005932	-0.220972
-0.472878	-0.104821	0.328140	0.152691
-0.392878	-0.237915	0.238896	0.430214
-0.324306	-0.308418	-0.259646	0.106819
-0.101449	-0.255181	-0.587646	-0.308028
0.138551	-0.091871	-0.233361	-0.116734
0.242582	0.096700	0.313266	0.348792
0.109979	0.203972	0.308690	0.421039
-0.500306	0.175894	-0.037932	0.068975
-1.058538	0.039105	-0.019646	-0.190044
-0.390592	-0.114893	0.220589	-0.104133
0.993154	-0.193310	0.177111	-0.017034
1.286958	-0.165972	-0.130504	-0.277100
0.517182	-0.078922	-0.372789	-0.600124
0.081408	-0.012731	-0.097361	-0.336665
0.005979	-0.013451	0.083289	0.230673
-0.547163	-0.056620	-0.247075	0.314388
-1.036873	-0.071728	-0.346504	-0.003272
-0.655735	-0.003372	-0.210504	-0.235863
-0.079735	0.135577	0.071848	-0.112152
0.156837	0.266606	0.646218	0.164159
0.226564	0.296844	0.732031	0.153838
0.015122	0.180213	0.068415	0.003608
-0.343735	-0.048706	-0.347646	0.040306
-0.085449	-0.291152	-0.120218	0.137783
0.630454	-0.450864	0.045532	0.114847
0.660202	-0.487555	-0.175075	0.096498
0.125979	-0.427123	-0.439075	0.106819
-0.189449	-0.320649	-0.413932	0.025397
-0.349449	-0.190433	-0.015075	-0.042263
-0.388306	-0.019210	0.191985	-0.081224
0.067694	0.205411	0.079857	-0.190044
0.765466	0.443712	0.118758	-0.265645
0.856999	0.613619	0.101596	-0.275955
0.397045	0.630897	0.108461	-0.111006
0.103122	0.470350	0.201138	0.140076
-0.166592	0.190293	-0.146504	0.103379
-0.471735	-0.084677	-0.391075	-0.021621
-0.224878	-0.231440	0.003211	0.140076
0.090551	-0.199066	0.122191	0.320122
-0.415735	-0.035037	-0.216218	0.238700
-1.039154	0.152136	-0.255075	0.021957
-0.706021	0.256527	0.011211	-0.178589
0.018551	0.234929	0.659948	-0.120170
0.281484	0.105339	1.122963	0.142370
0.371873	-0.081800	0.209147	0.070122
0.576678	-0.266692	-0.811646	-0.207226
0.646472	-0.404102	-0.554504	-0.170571
0.415351	-0.460936	-0.043646	0.087324
0.035694	-0.431440	0.140497	0.290305
-0.211163	-0.331440	0.029513	0.134342
-0.330021	-0.183958	-0.292789	-0.235863
-0.245449	0.000228	-0.146504	-0.191190
0.064265	0.213331	0.266356	0.111406
0.311232	0.430033	0.141642	0.043746
0.339836	0.595620	-0.261932	-0.245027
0.229996	0.639537	-0.147646	-0.278246
0.178551	0.514987	0.387637	-0.003272
0.207122	0.236369	0.335005	0.265076
-0.070592	-0.105541	-0.249361	0.228379
-0.459163	-0.369569	-0.503075	-0.109861
-0.264878	-0.435756	-0.219646	-0.319483
0.121408	-0.274605	0.486035	0.041452
-0.088878	0.025426	0.699994	0.456590
-0.538021	0.304044	-0.146504	0.206590
-0.516306	0.421394	-0.690504	-0.196917
-0.235163	0.329961	-0.187646	-0.070915
-0.086592	0.083021	0.576424	0.327003
0.068837	-0.206260	0.647362	0.324709
0.047122	-0.428562	-0.059646	-0.169426
-0.242021	-0.520648	-0.482504	-0.412266
-0.052306	-0.476044	-0.153361	-0.145371
0.655626	-0.327843	0.254914	0.057507
0.894756	-0.137195	0.130200	-0.073206
0.389035	0.029026	-0.471075	-0.301155
-0.034021	0.113979	-0.669932	-0.306883
0.162551	0.111819	-0.231075	-0.069769
0.338692	0.065743	0.123335	0.115994
-0.120878	0.043424	0.059262	0.090764
-0.564306	0.089501	-0.258504	-0.098406
-0.454592	0.200372	-0.235646	-0.136207
-0.135735	0.335721	0.140497	-0.009006
-0.024878	0.435793	0.318987	0.017370
-0.078592	0.445152	0.166813	-0.044557
-0.294592	0.336441	0.004354	-0.080078
-0.555163	0.127658	0.108461	0.032278
-0.482021	-0.117771	0.236607	0.252461
-0.424878	-0.322087	0.087866	0.377461
-0.674021	-0.438634	-0.223075	0.226085
-0.738021	-0.469569	-0.341932	-0.139643
-0.175735	-0.455181	0.005496	-0.330938
0.578967	-0.441512	0.281230	-0.210663
0.632742	-0.450864	-0.057361	-0.089242
0.181979	-0.471728	-0.538504	-0.183171
0.009408	-0.465972	-0.411646	-0.300010
0.109979	-0.392591	0.250337	-0.122461
0.276907	-0.237195	0.523793	0.172186
0.371873	-0.032159	0.048964	0.145810
0.258601	0.162215	-0.599075	-0.154534
-0.036306	0.289645	-0.695075	-0.262209
-0.131163	0.332841	0.027225	0.046039
0.100837	0.311243	0.720589	0.317828
0.019694	0.256527	0.678255	0.211177
-0.453449	0.195332	0.125623	-0.015887
-0.540306	0.147096	-0.313361	-0.080078
0.130551	0.120458	-0.121361	0.064388
0.798646	0.108219	0.268644	0.207737
0.543498	0.078702	0.155372	0.110260
-0.115163	0.001668	-0.153361	-0.081224
-0.204306	-0.124246	-0.361361	-0.119025
-0.008878	-0.245109	-0.276789	0.057507
-0.141449	-0.281080	0.109605	0.208884
-0.266021	-0.176764	0.174822	0.015076
-0.015735	0.051344	-0.013932	-0.245027
0.342125	0.302604	0.087866	-0.230136
0.441667	0.453792	0.175967	-0.132770
0.361575	0.425714	-0.033361	-0.105279
0.207122	0.234929	-0.147646	-0.018181
0.066551	-0.021368	-0.212789	0.059801
-0.007735	-0.214174	-0.200218	0.101085
-0.148306	-0.258778	0.132488	0.237553
-0.471735	-0.150864	0.211436	0.242140
-0.680878	0.037665	-0.251646	-0.011300
-0.347163	0.208291	-0.309932	-0.191190
0.153408	0.288925	0.328140	-0.108715
0.221987	0.259407	0.641642	0.033425
-0.052306	0.137737	0.245761	0.156131
-0.230592	-0.030720	-0.343075	0.138929
-0.284306	-0.192591	-0.432218	-0.054878
-0.152878	-0.299785	0.091298	-0.135061
0.170551	-0.332159	0.476882	0.054067
0.343269	-0.303382	0.172534	0.231819
0.031122	-0.245828	-0.426504	0.055214
-0.435163	-0.178922	-0.453932	-0.263354
-0.328878	-0.101944	0.121047	-0.228990
0.260889	-0.012731	0.336150	-0.010153
0.599562	0.071502	-0.026504	-0.058314
0.548074	0.116139	-0.379646	-0.288555
0.287205	0.098860	-0.291646	-0.254191
-0.096878	0.033345	0.188552	0.185948
-0.296878	-0.033598	0.355600	0.476085
-0.196306	-0.046548	-0.000218	0.173333
0.084837	0.021826	-0.167075	-0.267936
0.390180	0.144216	0.008925	-0.215245
0.549218	0.260847	0.161092	0.138929
0.405054	0.306923	0.145074	0.190535
-0.162021	0.257247	-0.111075	-0.094970
-0.792860	0.141337	-0.305361	-0.107570
-0.695735	0.023266	-0.115646	0.266223
-0.106021	-0.035756	0.148507	0.365994
0.010551	-0.016331	0.171390	-0.009006
-0.272878	0.041984	0.006639	-0.313755
-0.139163	0.075102	-0.052789	-0.217535
0.393612	0.041984	0.019216	-0.014740
0.537777	-0.050145	-0.028789	-0.090388
0.060837	-0.154461	-0.010504	-0.254191
-0.293449	-0.226404	0.077568	-0.146516
-0.061449	-0.244390	-0.096218	0.089617
0.151122	-0.213454	-0.136218	0.152691
-0.071735	-0.148706	0.023793	0.041452
-0.423735	-0.067411	-0.292789	-0.089242
-0.547163	0.014627	-0.600218	-0.149952
-0.160878	0.075822	-0.260789	-0.232427
0.463406	0.101740	0.126767	-0.312610
0.350134	0.085181	0.153083	-0.169426
-0.500306	0.028306	-0.105361	0.057507
-0.939952	-0.050145	-0.392218	0.042599
-0.644306	-0.111296	-0.145361	-0.100697
-0.326592	-0.123526	0.433404	-0.117879
-0.180306	-0.094749	0.413953	-0.034236
-0.005449	-0.077483	-0.107646	0.042599
-0.151735	-0.126404	-0.421932	-0.002126
-0.692306	-0.251584	-0.219646	-0.097261
-0.880659	-0.409138	0.384205	0.000168
-0.325449	-0.533598	0.631344	0.152691
0.358143	-0.578922	0.111893	0.095351
0.583543	-0.542951	-0.469932	-0.066333
0.415351	-0.456620	-0.395646	-0.086951
0.171694	-0.361656	0.077568	0.086177
0.085979	-0.281800	0.155372	0.167599
0.255168	-0.214174	-0.178504	-0.042263
0.529768	-0.139353	-0.367075	-0.266791
0.518326	-0.036476	-0.216218	-0.196917
0.233429	0.100300	0.149651	0.035718
0.162551	0.262287	0.344159	0.058654
0.259745	0.430033	0.289239	-0.029649
0.013979	0.565383	0.165669	0.099939
-0.323163	0.627298	0.045532	0.284571
-0.054592	0.586981	0.091298	0.308654
0.565237	0.450192	-0.087075	0.135489
0.540065	0.252928	-0.266504	-0.036529
0.069979	0.046304	0.337294	0.128608
-0.019163	-0.114174	0.812122	0.384342
0.008265	-0.178922	0.257202	0.328149
-0.069449	-0.120649	-0.397932	0.086177
0.071122	0.044864	-0.348789	-0.028502
0.345557	0.250768	0.046676	0.012783
0.449676	0.406995	0.197706	0.008195
0.451964	0.437233	0.004354	-0.124752
0.270042	0.325642	-0.072218	-0.224408
-0.091163	0.136297	0.081001	-0.215245
0.037979	-0.014891	0.067271	-0.188899
0.699104	-0.031440	-0.109932	-0.104133
0.829539	0.098860	-0.267646	-0.000979
0.145408	0.296124	-0.320218	-0.073206
-0.256878	0.441553	-0.074504	-0.201499
-0.062592	0.450912	0.261779	-0.058314
-0.269449	0.327802	0.123335	0.237553
-0.848732	0.160055	-0.338504	0.286865
-0.776878	0.054223	-0.379646	0.117140
-0.307163	0.064303	0.029513	0.066682
-0.357449	0.149256	0.375051	0.163012
-0.632878	0.201812	0.434548	0.089617
-0.405449	0.120458	0.129056	-0.200353
-0.058021	-0.117051	-0.069932	-0.285119
-0.058021	-0.424965	0.070703	-0.025061
-0.047735	-0.670289	-0.200218	0.038012
-0.026021	-0.750145	-0.367075	-0.162553
-0.158592	-0.653742	-0.016218	-0.253045
-0.256878	-0.458778	-0.016218	-0.195771
-0.148306	-0.271728	-0.122504	0.002461
-0.031735	-0.166692	-0.073361	0.082737
-0.276306	-0.147267	-0.299646	-0.148807
-0.419163	-0.164533	-0.293932	-0.287409
-0.063735	-0.162375	0.121047	-0.141934
0.290637	-0.124965	0.259491	-0.029649
0.220843	-0.078202	0.218301	-0.078933
0.104265	-0.062375	0.092443	-0.151098
0.274619	-0.092591	-0.364789	-0.030795
0.196837	-0.142231	-0.511075	0.285718
-0.367735	-0.163814	-0.096218	0.331590
-0.604306	-0.123526	0.177111	0.057507
-0.254592	-0.032159	0.331573	0.042599
-0.060306	0.064303	0.373907	0.205443
-0.093449	0.115418	-0.077932	0.016223
0.208265	0.106779	-0.320218	-0.283973
0.687662	0.063583	-0.017361	-0.293137
0.667067	0.018946	0.198850	-0.167135
0.218555	-0.015611	0.329285	0.024250
0.009408	-0.045828	0.079857	0.171039
-0.016878	-0.075325	-0.509932	0.099939
-0.122021	-0.086835	-0.333932	0.004755
-0.037449	-0.050145	0.297248	-0.010153
0.092837	0.050624	0.274365	0.051773
-0.028306	0.192452	-0.252789	0.122874
-0.146021	0.319882	-0.555646	0.019663
0.007122	0.372438	-0.234504	-0.130479
0.107694	0.319882	0.324708	-0.022768
0.029979	0.181653	0.256058	0.130902
0.012837	0.010307	-0.120218	0.020810
-0.099163	-0.127123	0.039811	-0.144225
-0.344878	-0.176044	0.362465	-0.105279
-0.280878	-0.117051	0.484891	0.122874
0.294070	0.016067	0.182832	0.218058
0.463406	0.147096	-0.602504	-0.045704
-0.212306	0.198212	-0.788789	-0.273664
-0.447735	0.129817	0.028369	-0.136207
0.095122	-0.037915	0.550108	0.106819
0.108837	-0.232879	0.092443	0.089617
-0.570021	-0.368131	-0.450504	-0.119025
-0.586021	-0.376044	-0.338504	-0.215245
0.153408	-0.240073	0.150795	-0.115588
0.497731	-0.013451	0.412809	-0.039970
0.289493	0.195332	0.205715	-0.149952
0.093979	0.269486	-0.167075	-0.224408
-0.054592	0.165095	-0.202504	-0.018181
-0.154021	-0.058778	-0.083646	0.212324
-0.141449	-0.271728	-0.073361	0.200856
-0.170021	-0.354461	-0.072218	0.056361
-0.228306	-0.270289	0.015784	-0.054878
0.035694	-0.081800	0.164525	-0.033089
0.334115	0.099580	0.206859	0.057507
0.031122	0.181653	0.000925	0.004755
-0.269449	0.142056	-0.185361	-0.141934
0.106551	0.028306	-0.026504	-0.060605
0.414207	-0.077483	0.117614	0.226085
0.007122	-0.113454	-0.192218	0.246727
-0.391735	-0.071008	-0.397932	-0.090388
-0.247735	0.009587	0.006639	-0.277100
0.019694	0.073662	0.393358	-0.097261
0.256312	0.092380	0.165669	0.065535
0.408486	0.070062	-0.123646	-0.035383
0.084837	0.037665	-0.105361	-0.141934
-0.351735	0.025426	-0.037932	-0.019327
-0.164306	0.041265	0.248049	0.244434
0.334115	0.063583	0.301825	0.307507
0.075694	0.059263	-0.169361	0.124021
-0.563163	0.008867	-0.247075	0.028838
-0.316306	-0.074605	0.003211	-0.083515
0.416495	-0.146548	0.138209	-0.267936
0.608715	-0.159497	0.222877	-0.257627
0.415351	-0.097627	-0.056218	-0.138498
0.318097	0.011747	-0.410504	-0.020474
0.186551	0.111099	-0.196789	0.090764
-0.116306	0.160055	0.131344	0.140076
-0.227163	0.149976	-0.149932	0.135489
-0.238592	0.106779	-0.504218	0.025397
-0.343735	0.070062	-0.167075	-0.146516
-0.226021	0.072942	0.333861	-0.155680
-0.039735	0.125498	0.481459	-0.004419
-0.115163	0.203252	0.353312	0.002461
-0.133449	0.253648	-0.136218	-0.176298
0.079122	0.228450	-0.349932	-0.127043
0.129408	0.111099	-0.007075	0.144663
-0.114021	-0.079641	0.014639	0.142370
-0.426021	-0.293310	-0.189932	-0.078933
-0.614592	-0.465972	-0.097361	-0.192335
-0.431735	-0.535756	-0.091646	-0.077787
-0.083163	-0.467411	-0.101932	0.130902
-0.157449	-0.276764	0.235463	0.137783
-0.394021	-0.035756	0.189696	-0.124752
-0.262592	0.150696	-0.159075	-0.251900
0.163694	0.191013	0.061550	-0.014740
0.572102	0.054943	0.173678	0.071269
0.467983	-0.206260	-0.064218	-0.089242
0.055122	-0.472447	-0.115646	-0.074351
-0.040878	-0.612735	-0.331646	0.041452
-0.018021	-0.549426	-0.349932	0.083884
-0.196306	-0.294030	0.218301	0.041452
-0.332306	0.052784	0.464296	-0.035383
-0.168878	0.351560	0.106173	0.005902
0.138551	0.494108	-0.181932	0.035718
0.270042	0.448752	-0.107646	-0.096115
0.295214	0.266606	0.063838	-0.113297
0.319241	0.041265	0.068415	0.138929
0.315809	-0.145109	-0.001361	0.329296
0.177408	-0.244390	-0.080218	0.193975
-0.192878	-0.246548	-0.096218	-0.084660
-0.301449	-0.161656	0.124479	-0.153389
0.306656	-0.009131	0.220589	-0.031942
0.816953	0.177334	0.100452	0.029984
0.437090	0.346520	0.000925	-0.027355
-0.237449	0.442272	-0.223075	-0.104133
-0.351735	0.425714	-0.075646	-0.025061
0.079122	0.303324	0.387637	0.104526
0.359287	0.130537	0.150795	0.097645
0.236861	-0.018490	-0.324789	0.095351
0.029979	-0.084677	-0.210504	0.107966
-0.044306	-0.053023	0.013496	0.058654
-0.172306	0.049184	0.175967	0.130902
-0.266021	0.163655	0.182832	0.145810
-0.133449	0.228450	-0.028789	-0.139643
0.021979	0.207571	-0.042504	-0.293137
0.096265	0.116858	-0.089361	-0.121316
0.120265	0.011027	-0.248218	0.103379
0.125979	-0.057339	-0.224218	0.102232
-0.238592	-0.068850	-0.114504	-0.093824
-0.801982	-0.043670	0.053541	-0.145371
-0.645449	-0.017051	0.337294	0.012783
0.061979	-0.014171	0.370474	0.034572
0.178551	-0.040792	0.004354	-0.151098
-0.240878	-0.083238	-0.272218	-0.191190
-0.109449	-0.123526	-0.191075	-0.038823
0.334115	-0.157339	0.100452	0.079296
0.089408	-0.196908	0.236607	0.110260
-0.508306	-0.257339	-0.128218	0.047186
-0.503735	-0.334318	-0.444789	-0.082369
-0.000878	-0.390433	-0.240218	-0.188899
0.225420	-0.373167	-0.064218	-0.254191
0.156837	-0.257339	-0.068789	-0.209517
0.335260	-0.074605	-0.012789	-0.094970
0.441667	0.101740	-0.043646	-0.119025
0.005979	0.202532	0.118758	-0.114443
-0.282021	0.207571	0.491756	0.205443
0.020837	0.142776	0.261779	0.526544
0.027694	0.057823	-0.373932	0.430214
-0.488878	-0.002652	-0.335075	0.058654
-0.381449	-0.019210	0.140497	-0.192335
0.427937	-0.002652	0.216012	-0.151098
0.739150	0.010307	0.046676	0.015076
0.365008	-0.001212	-0.018504	-0.005566
-0.060306	-0.024965	0.005496	-0.135061
-0.339163	-0.021368	-0.003646	-0.097261
-0.327735	0.034065	-0.103075	-0.012447
0.243726	0.124058	-0.203646	-0.066333
0.803223	0.198932	-0.291646	-0.159116
0.461118	0.209011	-0.195646	-0.084660
-0.302592	0.140617	0.045532	0.103379
-0.616878	0.034065	0.217157	0.161865
-0.702592	-0.039353	0.484891	0.125168
-0.635163	-0.022807	0.259491	0.064388
-0.102592	0.075822	-0.553361	-0.081224
0.497731	0.183093	-0.429932	-0.234718
0.582399	0.208291	0.370474	-0.314901
0.201408	0.094540	0.357889	-0.157971
-0.314021	-0.140792	0.046676	0.245581
-0.576878	-0.396188	-0.232218	0.301773
-0.460306	-0.539354	-0.556789	-0.054878
-0.302592	-0.478202	-0.104218	-0.041116
-0.206592	-0.235037	0.455143	0.203150
-0.034021	0.057103	0.135921	0.094205
0.157979	0.232769	-0.371646	-0.194626
0.064265	0.204691	-0.452789	-0.403102
0.033408	0.011027	-0.105361	-0.404248
0.625877	-0.217771	0.310978	-0.117879
0.845557	-0.348706	0.186264	0.102232
-0.054592	-0.319210	-0.163646	-0.021621
-0.675163	-0.158778	-0.177361	-0.145371
-0.284306	0.051344	-0.001361	-0.009006
0.080265	0.224850	0.099308	0.142370
0.120265	0.310523	0.023793	0.107966
0.063122	0.299724	-0.002504	0.134342
-0.475163	0.214771	0.162237	0.352232
-1.041434	0.096700	0.227454	0.399250
-0.688878	-0.019210	0.322420	0.214617
0.100837	-0.113454	0.460864	0.074709
0.485145	-0.191872	0.235463	-0.026208
0.940523	-0.265253	-0.127075	-0.184317
1.630174	-0.332879	-0.259646	-0.253045
1.228805	-0.368850	-0.289361	-0.105279
-0.196306	-0.332879	-0.252789	0.077003
-0.635163	-0.196188	-0.192218	0.046039
0.117979	0.041265	-0.256218	-0.090388
0.316953	0.336441	-0.387646	-0.102988
-0.154021	0.617218	-0.225361	-0.084660
-0.093449	0.798644	0.258346	-0.174007
0.248303	0.826002	0.402511	-0.275955
0.077979	0.699292	0.220589	-0.191190
0.066551	0.476830	0.265211	0.109113
0.474848	0.238529	0.156516	0.328149
0.004837	0.040545	-0.183075	0.340764
-1.179405	-0.097627	-0.064218	0.321269
-1.274045	-0.180361	0.076424	0.208884
-0.525449	-0.221368	-0.209361	-0.056023
-0.332306	-0.232879	-0.224218	-0.165989
-0.291163	-0.227123	0.061550	-0.085806
0.122551	-0.214893	0.155372	-0.080078
0.163694	-0.209857	0.155372	-0.159116
-0.200878	-0.225685	0.091298	-0.200353
-0.102592	-0.273886	-0.042504	-0.164844
0.490866	-0.350864	-0.187646	-0.113297
0.811232	-0.430720	-0.314504	-0.083515
0.482857	-0.476044	-0.191075	0.047186
-0.290021	-0.446548	-0.193361	0.088471
-0.916006	-0.319210	-0.450504	-0.168280
-0.555163	-0.101224	-0.320218	-0.340101
0.417640	0.163655	0.077568	-0.215245
0.482857	0.399076	0.418530	-0.054878
-0.094592	0.524346	0.551253	-0.022768
-0.094592	0.484749	0.043243	0.004755
-0.055735	0.293244	-0.415075	0.237553
-0.599735	0.026146	-0.060789	0.501315
-0.733449	-0.215613	0.267500	0.384342
-0.181449	-0.356620	0.253770	0.077003
0.209408	-0.385397	0.285806	-0.062896
0.344413	-0.336476	0.062694	-0.147662
0.395900	-0.255900	-0.224218	-0.198062
0.235717	-0.175325	-0.255075	-0.170571
0.193408	-0.100505	-0.340789	-0.175153
0.513749	-0.031440	-0.121361	-0.076642
0.495443	0.025426	0.381916	0.198562
-0.156306	0.057823	0.091298	0.230673
-0.419163	0.070062	-0.491646	0.019663
0.217411	0.090941	-0.473361	-0.133916
0.472559	0.155015	-0.233361	-0.245027
0.042551	0.268046	0.169101	-0.233572
0.185408	0.391157	0.593587	-0.113297
0.433658	0.461711	0.372763	-0.047997
-0.412306	0.437233	-0.200218	0.041452
-1.256942	0.326362	-0.283646	0.199709
-0.656878	0.179493	0.022649	0.247874
0.201408	0.047744	0.276653	0.205443
-0.155163	-0.060936	0.344159	0.164159
-0.604306	-0.170289	0.030658	0.038012
-0.133449	-0.302663	-0.298504	-0.058314
0.113408	-0.436476	-0.181932	0.041452
-0.334592	-0.513454	0.048964	0.065535
-0.330021	-0.485397	0.154227	-0.104133
0.414207	-0.361656	0.082145	-0.222117
0.661347	-0.204821	0.028369	-0.133916
0.345557	-0.085397	0.076424	0.024250
0.369584	-0.041512	-0.208218	-0.034236
0.365008	-0.055181	-0.402504	-0.183171
0.075694	-0.071008	-0.347646	-0.255336
0.170551	-0.032879	-0.445932	-0.329792
0.482857	0.077982	-0.171646	-0.247318
0.172837	0.231329	0.323564	-0.011300
-0.600878	0.372438	0.240040	0.161865
-0.968458	0.458831	0.072992	0.277691
-0.779163	0.475390	0.147362	0.298333
-0.376878	0.422834	0.183976	0.158425
0.085979	0.301164	0.332717	0.015076
0.425649	0.106779	0.351024	-0.064042
0.410774	-0.153742	-0.017361	-0.052584
0.113408	-0.437195	-0.344218	0.065535
-0.242021	-0.659497	-0.376218	0.086177
-0.330021	-0.727123	-0.271075	-0.036529
-0.043163	-0.594749	-0.127075	-0.104133
0.184265	-0.306260	0.046676	-0.080078
0.088265	0.024706	0.159948	-0.096115
0.008265	0.270926	0.098163	-0.138498
0.017408	0.361639	-0.105361	-0.108715
-0.008878	0.311243	-0.201361	-0.056023
0.220843	0.192452	-0.029932	-0.058314
0.615580	0.081581	0.118758	-0.062896
0.427937	0.013187	0.072992	0.058654
-0.205449	-0.026404	-0.027646	0.203150
-0.507163	-0.054461	-0.026504	0.193975
-0.498021	-0.064533	0.218301	0.183654
-0.477449	-0.033598	0.437980	0.274250
-0.190592	0.048464	0.173678	0.213471
0.334115	0.150696	-0.340789	-0.128188
0.475992	0.213331	-0.482504	-0.454649
0.310088	0.181653	-0.073361	-0.360720
0.376449	0.046304	0.309834	0.011636
0.234573	-0.145828	0.238896	0.165305
-0.370021	-0.305541	-0.141932	0.058654
-0.564306	-0.345109	-0.339646	0.046039
-0.070592	-0.224965	-0.098504	0.175627
0.343269	0.017506	0.170246	0.096498
0.352422	0.273086	0.178255	-0.093824
0.295214	0.417794	-0.033361	-0.109861
0.073408	0.384677	-0.121361	-0.066333
-0.119735	0.199652	0.015784	-0.080078
0.097408	-0.030720	-0.028789	-0.075497
0.167122	-0.179641	0.031802	0.048333
-0.091163	-0.176764	0.265211	0.104526
-0.126592	-0.041512	0.100452	-0.096115
0.019694	0.137017	-0.052789	-0.217535
0.129408	0.257967	-0.146504	-0.120170
0.244871	0.265167	-0.451646	0.008195
0.162551	0.163655	-0.416218	0.167599
-0.442021	0.007427	-0.119075	0.231819
-1.114410	-0.131440	0.123335	0.203150
-1.017489	-0.192591	0.266356	0.140076
-0.335735	-0.162375	0.237751	-0.081224
0.265466	-0.072447	0.250337	-0.286264
0.617868	0.016067	0.183976	-0.298864
0.661347	0.041265	-0.093932	-0.192335
0.328395	-0.025684	-0.237932	-0.093824
-0.242021	-0.165253	-0.040218	-0.027355
-0.508306	-0.318490	0.142786	0.114847
-0.306021	-0.412735	-0.165932	0.183654
-0.112878	-0.399066	-0.507646	0.020810
0.065408	-0.273886	-0.481361	-0.237009
0.226564	-0.080361	-0.179646	-0.253045
0.082551	0.106779	0.140497	0.059801
-0.272878	0.217650	0.159948	0.214617
-0.493449	0.219810	0.253770	0.062095
-0.343735	0.137737	0.373907	-0.085806
0.055122	0.029745	0.090154	-0.068624
0.519470	-0.048706	-0.145361	0.074709
0.637319	-0.078922	-0.146504	0.005902
0.026551	-0.081080	-0.056218	-0.265645
-0.475163	-0.088994	0.081001	-0.281682
-0.125449	-0.114893	0.008925	-0.031942
0.201408	-0.142231	-0.181932	0.117140
-0.270592	-0.137915	-0.340789	0.010489
-0.796280	-0.081080	-0.248218	-0.058314
-0.576878	0.016786	0.321275	0.191682
-0.216878	0.104619	0.603884	0.442828
-0.312878	0.125498	0.029513	0.239847
-0.262592	0.048464	-0.291646	-0.169426
0.346701	-0.109857	0.256058	-0.272518
0.867296	-0.289713	0.725166	0.005902
0.771186	-0.424965	0.415097	0.323562
0.347845	-0.469569	-0.340789	0.271957
0.011694	-0.410577	-0.688218	-0.067478
0.139694	-0.260936	-0.279075	-0.204935
0.807800	-0.053023	0.257202	-0.027355
1.258452	0.167974	0.216012	0.071269
0.776907	0.348680	-0.213932	-0.100697
-0.157449	0.462431	-0.444789	-0.231281
-0.454592	0.525786	-0.329361	-0.102988
0.114551	0.579781	0.100452	0.146957
0.573246	0.648176	0.503198	0.220351
0.178551	0.707931	0.328140	0.046039
-0.378021	0.704331	-0.177361	-0.049144
-0.358592	0.599220	-0.101932	0.114847
-0.236306	0.405555	0.435692	0.230673
-0.427163	0.183813	0.479170	0.034572
-0.391735	0.000228	0.078713	-0.137352
0.085979	-0.118490	-0.236789	-0.009006
0.072265	-0.186835	-0.439075	0.122874
-0.645449	-0.237915	-0.324789	0.033425
-0.838469	-0.295469	-0.023075	-0.094970
-0.315163	-0.357339	0.038667	-0.030795
-0.196306	-0.399785	0.062694	0.140076
-0.396306	-0.398346	0.029513	0.058654
-0.055735	-0.340792	-0.197932	-0.231281
0.440523	-0.242231	-0.167075	-0.328647
0.427937	-0.143670	0.174822	-0.278246
0.374161	-0.091871	0.179399	-0.337810
0.493154	-0.110577	-0.170504	-0.352702
0.271186	-0.183238	-0.392218	-0.132770
-0.181449	-0.251584	-0.375075	0.083884
-0.453449	-0.243670	-0.017361	0.114847
-0.619163	-0.122087	0.304113	0.025397
-0.658021	0.083741	0.064983	-0.090388
-0.245449	0.286045	-0.275646	-0.053731
0.274619	0.384677	-0.441361	0.016223
0.162551	0.322042	-0.369361	-0.026208
-0.319735	0.111099	0.201138	0.058654
-0.528878	-0.170289	0.486035	0.197416
-0.630592	-0.413454	0.155372	0.190535
-0.453449	-0.528562	0.005496	0.078150
0.154551	-0.482519	0.373907	-0.034236
0.455397	-0.316332	0.610749	0.036865
0.199122	-0.118490	0.135921	0.112553
0.063122	0.013907	-0.328218	-0.067478
0.454253	0.025426	-0.223075	-0.240445
0.533200	-0.073166	-0.231075	-0.086951
0.081408	-0.213454	-0.444789	0.097645
0.169408	-0.309138	-0.340789	-0.082369
0.612147	-0.292591	-0.105361	-0.322919
0.087122	-0.145109	0.022649	-0.120170
-0.686592	0.101740	-0.025361	0.200856
-0.127735	0.372438	-0.113361	0.055214
0.792925	0.586261	0.130200	-0.273664
0.513749	0.679853	0.284662	-0.283973
-0.162021	0.626578	0.081001	0.049480
-0.148306	0.442272	0.078713	0.347645
-0.178021	0.188853	0.172534	0.208884
-0.693449	-0.042231	0.126767	-0.041116
-0.756306	-0.176044	0.185120	0.173333
-0.149449	-0.196908	0.090154	0.524250
0.076837	-0.150864	-0.293932	0.336177
-0.341449	-0.101224	-0.323646	-0.227845
-0.406592	-0.094749	0.131344	-0.352702
0.178551	-0.147987	0.428827	0.113700
0.509173	-0.241512	0.159948	0.294893
0.379882	-0.330720	-0.364789	-0.295428
0.332971	-0.363094	-0.319075	-0.678017
0.513749	-0.306260	0.139353	-0.180880
0.532056	-0.165972	0.154227	0.317828
0.348990	0.015347	-0.163646	0.091911
0.099694	0.182373	-0.250504	-0.289701
-0.234021	0.296844	-0.197932	-0.193481
-0.226021	0.351560	0.045532	0.181361
0.255168	0.363799	0.392214	0.362553
0.123694	0.355879	0.102740	0.192828
-0.861275	0.335001	-0.339646	0.055214
-1.034593	0.293964	0.026081	0.148104
0.068837	0.222690	0.593587	0.152691
0.844413	0.114699	0.589010	0.031131
0.617868	-0.029282	0.232031	-0.004419
0.312376	-0.194030	-0.200218	-0.017034
0.287205	-0.335756	-0.447075	-0.081224
0.165979	-0.390433	-0.332789	-0.084660
0.088265	-0.315613	-0.122504	-0.034236
-0.006592	-0.127123	0.074136	0.066682
-0.426021	0.103900	0.154227	0.122874
-0.655735	0.296124	0.055829	0.058654
-0.204306	0.404115	-0.067646	0.013929
0.136265	0.424274	-0.032218	0.047186
-0.010021	0.373158	0.067271	0.041452
0.151122	0.261567	-0.015075	-0.068624
0.425649	0.091660	0.015784	-0.147662
0.059694	-0.123526	0.175967	-0.139643
-0.373449	-0.335037	-0.026504	-0.121316
-0.187163	-0.465253	-0.247075	-0.083515
0.025408	-0.442951	-0.221932	-0.120170
-0.165449	-0.254461	-0.104218	-0.231281
-0.106021	0.033345	0.224022	-0.135061
0.178551	0.288205	0.275509	0.086177
-0.141449	0.382517	-0.076789	0.167599
-0.718592	0.264447	-0.204789	0.177920
-0.710592	-0.006972	-0.218504	0.119434
-0.258021	-0.293310	-0.105361	0.110260
0.092837	-0.465972	0.206859	0.247874
0.045979	-0.475325	0.134777	0.214617
-0.186021	-0.363094	-0.160218	-0.083515
-0.039735	-0.217771	0.024937	-0.296573
0.554939	-0.111296	0.316699	-0.243881
0.946244	-0.063814	0.127912	-0.176298
0.795214	-0.053742	-0.255075	-0.312610
0.541209	-0.043670	-0.419646	-0.471831
0.292926	-0.005532	-0.196789	-0.278246
-0.110592	0.070062	0.127912	0.216911
-0.471735	0.173014	-0.028789	0.513929
-0.787158	0.281005	-0.409361	0.386636
-1.055117	0.367398	-0.311075	0.081590
-0.735735	0.411315	0.107317	-0.107570
0.151122	0.391876	0.483747	-0.106424
0.596129	0.290365	0.740040	-0.034236
0.320385	0.101020	0.455143	-0.034236
0.023122	-0.144390	-0.178504	0.051773
-0.059163	-0.374605	-0.381932	0.254755
-0.167735	-0.510577	-0.212789	0.284571
-0.155163	-0.509857	-0.152218	0.094205
0.091694	-0.396188	-0.293932	-0.192335
0.234573	-0.237195	-0.311075	-0.466104
0.184265	-0.099785	-0.003646	-0.480995
0.064265	-0.000492	0.078713	-0.294282
-0.132306	0.089501	0.010068	-0.143080
-0.213449	0.200372	0.216012	-0.006713
-0.170021	0.326362	0.147362	0.072416
-0.135735	0.409155	-0.081361	0.073562
0.057408	0.370998	0.083289	0.129755
0.169408	0.172294	0.053541	0.185948
-0.239735	-0.144390	-0.194504	0.172186
-0.516306	-0.451584	-0.136218	0.065535
-0.176878	-0.608418	0.010068	-0.031942
-0.086592	-0.540073	0.113038	0.121728
-0.440878	-0.287555	0.119903	0.254755
-0.210021	0.015347	-0.115646	-0.050291
0.576678	0.215491	-0.048218	-0.344683
0.645328	0.228450	0.330429	-0.143080
0.167122	0.075102	0.082145	0.078150
0.391324	-0.139353	-0.481361	-0.069769
0.811232	-0.285397	-0.492789	-0.317192
0.303223	-0.275325	-0.058504	-0.298864
-0.260306	-0.108418	0.352168	0.068975
0.068837	0.142776	0.326996	0.372874
0.177408	0.374598	0.012354	0.328149
-0.638592	0.516427	-0.040218	0.171039
-1.069940	0.547384	0.203427	0.138929
-0.252306	0.480429	0.572992	0.171039
0.871873	0.335721	0.653083	0.074709
1.099562	0.131977	0.023793	-0.124752
0.513749	-0.104102	-0.586504	-0.073206
0.064265	-0.317771	-0.479075	0.202003
0.027694	-0.437195	-0.169361	0.263929
-0.118592	-0.401224	0.029513	0.102232
-0.342592	-0.206979	0.098163	-0.002126
[truncated: 13,360 more rows]
