# Supplementary material for: Model Parameter Estimation Method on Multichannel Structural Response from Turbulence Flutter Test
Source: Hindawi journal article supplement (doi:10.1155/2022/3343675), 2022-06-11
Supplement: f1 [file 3343675.f1.zip › 12 channles-wing.txt]

-0.255241	0.305297	0.076607	0.158881	0.408613	-0.288507	-0.174851	0.076806	-0.034254	-0.399319	0.185786	0.346533
-0.039379	0.248552	0.148277	0.197078	0.199784	-0.429523	-0.177500	0.234856	-0.044455	0.229682	0.272397	0.232760
0.103936	0.126793	0.218446	-0.147011	-0.167518	-0.484641	-0.146474	0.119975	0.038284	0.461122	0.085559	0.020560
0.108801	0.012180	0.286363	-0.434525	-0.368209	-0.431313	-0.135502	0.048278	0.110846	-0.114579	-0.064943	-0.024709
0.149968	-0.078353	0.251467	-0.219176	-0.292231	-0.294949	-0.140799	0.264146	0.084391	-0.520107	0.058706	0.079317
0.271600	-0.133199	0.060472	0.258193	-0.144878	-0.128163	-0.088964	0.255510	0.033748	-0.190307	0.254621	0.126099
0.289190	-0.090750	-0.149594	0.396849	-0.176344	0.017511	0.039686	-0.170190	0.074565	0.250894	0.260673	0.075574
0.118157	0.053888	-0.191980	0.074083	-0.349790	0.108094	0.135826	-0.359380	0.176606	0.170970	0.152125	0.038898
-0.043868	0.148214	-0.064073	-0.285232	-0.398524	0.139960	0.088134	0.014119	0.234429	-0.148657	0.135105	0.036652
-0.003464	0.085455	0.037958	-0.354724	-0.248485	0.130651	-0.054911	0.478191	0.236696	-0.125181	0.194107	-0.042666
0.151840	0.020820	-0.052820	-0.190921	-0.108424	0.107378	-0.133232	0.193174	0.229894	0.167940	0.137753	-0.248428
0.199370	0.128296	-0.266624	0.016410	-0.080412	0.085896	-0.065127	-0.380025	0.180385	0.270212	-0.084603	-0.400691
0.086720	0.249679	-0.366023	0.106169	-0.007503	0.059401	0.069966	-0.298569	0.041685	-0.066869	-0.261541	-0.236456
-0.036012	0.117022	-0.251620	-0.015663	0.194793	0.007128	0.140746	0.316719	-0.097345	-0.582204	-0.179499	0.182236
-0.031148	-0.180532	-0.099707	-0.242085	0.351031	-0.081277	0.105924	0.520624	-0.098100	-0.603409	0.073456	0.426248
0.066510	-0.304875	-0.093705	-0.323032	0.271569	-0.189366	0.035523	0.070800	-0.004409	0.087258	0.233441	0.265694
0.104310	-0.170765	-0.145468	-0.202757	0.012068	-0.283138	0.021518	-0.263659	0.002391	0.825894	0.236089	-0.000766
-0.003464	-0.008857	-0.055821	-0.085537	-0.198984	-0.331098	0.092676	-0.038434	-0.135879	0.771728	0.216800	-0.038177
-0.171440	0.026079	0.137020	-0.099283	-0.230834	-0.318571	0.194493	0.395953	-0.283593	-0.020296	0.177843	0.065470
-0.244392	0.020445	0.180547	-0.134793	-0.184019	-0.247705	0.236885	0.339625	-0.288882	-0.683681	-0.012770	0.121607
-0.183037	0.050506	-0.017186	-0.047355	-0.202054	-0.135321	0.180110	-0.189710	-0.128323	-0.386067	-0.276664	0.200200
-0.099985	0.027958	-0.235491	0.148567	-0.261916	-0.014706	0.071480	-0.367638	0.080234	0.568318	-0.350009	0.324078
-0.100733	-0.100141	-0.229864	0.268124	-0.253090	0.071217	-0.008373	-0.134530	0.161488	0.738016	-0.189707	0.231637
-0.143007	-0.192178	-0.039692	0.133671	-0.170204	0.085896	-0.018589	0.032512	0.053401	-0.101326	-0.027514	-0.185951
-0.117194	-0.118549	0.087489	-0.130593	-0.116482	0.026462	0.008653	0.047903	-0.097722	-0.623098	0.008025	-0.572408
-0.021795	0.010678	0.015072	-0.133265	-0.159844	-0.073045	-0.012535	-0.055326	-0.107545	-0.356532	0.003110	-0.555573
0.037319	0.013307	-0.134215	0.213885	-0.224310	-0.158586	-0.127178	-0.182953	0.019013	-0.078229	-0.003318	-0.222614
0.005889	-0.082486	-0.150720	0.425115	-0.186321	-0.187218	-0.222902	-0.059830	0.108956	-0.043015	-0.078176	0.050874
-0.058458	-0.103898	-0.020562	0.143220	-0.102668	-0.147490	-0.117341	0.169524	0.039039	0.061500	-0.212391	0.002975
-0.096992	0.007297	0.051091	-0.225667	-0.138738	-0.065529	0.154372	0.229974	-0.111323	0.109985	-0.326569	-0.334847
-0.104848	0.150468	-0.068949	-0.092028	-0.212415	0.013930	0.299717	0.094449	-0.138523	-0.168725	-0.404452	-0.649849
-0.086891	0.217736	-0.225738	0.385771	-0.064679	0.050808	0.149073	0.033263	0.038284	-0.268687	-0.464565	-0.617301
-0.040127	0.188800	-0.181852	0.501891	0.231262	0.036487	-0.086315	0.230725	0.249924	0.112637	-0.502373	-0.318761
0.021976	0.124162	0.049591	-0.005354	0.284237	-0.005758	-0.107503	0.252505	0.283182	0.126652	-0.528081	-0.156396
0.094205	0.092971	0.224825	-0.612074	-0.005968	-0.038686	0.076779	-0.050821	0.141458	-0.471640	-0.526191	-0.247305
0.190013	0.092971	0.182799	-0.667057	-0.272276	-0.032959	0.216825	-0.256902	0.002013	-0.682167	-0.404830	-0.280975
0.284699	0.073430	0.006445	-0.139756	-0.189391	0.011782	0.163078	-0.215611	-0.039543	-0.211890	-0.117117	-0.112625
0.302289	0.040735	-0.128589	0.396085	0.123776	0.062266	-0.008752	-0.148794	-0.059566	0.213773	0.225499	-0.022838
0.224070	0.030589	-0.146593	0.443067	0.294218	0.068352	-0.139664	0.055410	-0.167991	0.317940	0.442972	-0.182958
0.145103	-0.012613	-0.070449	0.067590	0.153719	-0.008621	-0.144204	0.214954	-0.345550	0.362258	0.447132	-0.297436
0.155956	-0.156866	0.070604	-0.303559	-0.087702	-0.163596	-0.058695	-0.014034	-0.442263	0.230061	0.295847	-0.054638
0.209474	-0.265431	0.239084	-0.362360	-0.159460	-0.335751	0.024925	-0.277172	-0.341017	-0.153958	0.122246	0.364497
0.178786	-0.107655	0.356532	-0.135556	-0.086168	-0.435250	0.057854	-0.102623	-0.105656	-0.239531	-0.014282	0.496233
0.032079	0.229010	0.378671	0.068736	-0.058923	-0.394090	0.068452	0.251379	0.075699	0.064531	-0.168157	0.177745
-0.099236	0.331227	0.337020	-0.017190	-0.127994	-0.207977	0.090784	0.222464	0.084769	0.336879	-0.332240	-0.283594
-0.068185	0.057646	0.228202	-0.212685	-0.159844	0.056895	0.093433	-0.048194	-0.043321	0.363773	-0.395756	-0.486362
0.075867	-0.186543	0.004944	-0.088974	-0.004433	0.298213	0.027574	-0.022293	-0.195947	0.102031	-0.340558	-0.316142
0.094205	-0.056941	-0.247119	0.302502	0.309573	0.432477	-0.077235	0.158638	-0.277171	-0.144113	-0.268346	0.041143
-0.123180	0.197067	-0.313510	0.434282	0.518402	0.429970	-0.119232	0.046026	-0.253748	-0.106248	-0.223356	0.299377
-0.333056	0.176774	-0.143593	0.165374	0.409765	0.323275	-0.062100	-0.214485	-0.172902	0.024763	-0.209745	0.244362
-0.222319	-0.025010	0.052592	-0.081337	0.120705	0.187221	-0.003833	-0.145416	-0.113589	0.063394	-0.281957	-0.114496
0.121525	-0.066332	0.091242	-0.070264	-0.091156	0.097711	-0.048858	0.228472	-0.073166	-0.028248	-0.384414	-0.499082
0.278711	0.047124	0.021824	0.041616	-0.190926	0.090909	-0.152906	0.185290	0.022414	-0.253541	-0.323166	-0.592610
0.079983	0.071551	-0.012685	0.189056	-0.216252	0.143540	-0.169932	-0.356377	0.164512	-0.380008	-0.104641	-0.368143
-0.174433	-0.005851	0.029703	0.385771	-0.116098	0.195814	-0.053776	-0.503149	0.220445	-0.193715	0.034878	-0.063617
-0.178174	-0.019751	0.082611	0.428934	0.026271	0.196530	0.071859	-0.098119	0.118405	0.035743	0.070809	0.121982
-0.013939	0.019318	0.090491	0.224198	0.042394	0.133157	0.076022	0.275036	-0.042188	0.011510	0.195998	0.148928
0.069879	-0.026888	0.078859	0.038560	0.040475	0.036487	0.000707	0.348262	-0.112456	-0.089967	0.326482	0.059107
0.016364	-0.127189	0.096870	0.001901	0.232030	-0.036180	-0.008752	0.188668	-0.024432	-0.072549	0.188812	-0.039299
-0.068185	-0.111411	0.114131	-0.109592	0.455830	-0.031885	0.088891	-0.084605	0.195880	0.030442	-0.104263	-0.040796
-0.105222	0.050506	0.056720	-0.296686	0.400552	0.064414	0.198657	-0.224620	0.418480	0.134228	-0.195000	-0.030321
-0.062573	0.191430	-0.026564	-0.228721	0.155638	0.214790	0.250133	0.122602	0.453250	0.120212	-0.101994	-0.172483
0.056031	0.158736	-0.001807	0.061478	0.040859	0.349054	0.251647	0.554420	0.272977	0.072485	-0.078176	-0.352431
0.156705	-0.012989	0.107001	0.101585	0.111876	0.404908	0.194115	0.240489	0.103287	0.201273	-0.060785	-0.263018
0.139115	-0.166257	0.111504	-0.185575	0.202855	0.364092	0.054448	-0.275296	0.103665	0.216803	0.149099	0.082685
0.051540	-0.189172	-0.043068	-0.290195	0.259285	0.258112	-0.104476	-0.172067	0.108578	-0.082772	0.423683	0.301622
0.002522	-0.100141	-0.160847	-0.000008	0.341434	0.145688	-0.165770	0.166146	-0.072033	-0.039607	0.522019	0.219287
-0.024414	0.002789	-0.076076	0.196696	0.424736	0.077661	-0.095396	0.101957	-0.307394	0.410364	0.462261	0.109257
-0.078660	0.034722	0.112255	-0.095465	0.387884	0.069784	0.036280	-0.079725	-0.384462	0.367182	0.331399	0.222281
-0.058458	-0.009608	0.173793	-0.518527	0.192106	0.103082	0.130905	-0.039185	-0.327794	-0.071792	0.094258	0.420260
0.134998	-0.066708	0.045088	-0.504399	0.004776	0.138528	0.108574	0.009614	-0.221259	-0.091103	-0.179121	0.458434
0.329235	-0.086618	-0.115086	-0.079046	0.032413	0.141750	-0.034480	0.035140	-0.027832	0.047485	-0.269480	0.346907
0.255507	-0.080607	-0.155221	0.263541	0.200935	0.098427	-0.169554	0.024629	0.183408	-0.193715	-0.137911	0.235006
-0.043494	-0.053936	-0.097081	0.234511	0.242778	0.021449	-0.141177	0.053909	0.202305	-0.294435	0.026936	0.168389
-0.244392	-0.004724	-0.027689	-0.008027	0.116866	-0.059802	0.012815	0.104209	0.021280	0.142561	0.119598	0.130964
-0.172936	-0.000968	0.027452	-0.130593	0.028575	-0.111342	0.076022	-0.009530	-0.137768	0.345591	0.190703	0.132835
0.012249	-0.090750	0.059722	0.018701	0.008614	-0.118142	-0.041669	-0.193088	-0.163457	-0.025218	0.251595	0.145934
0.079609	-0.133575	0.055219	0.241386	-0.137587	-0.093804	-0.158203	-0.136407	-0.107923	-0.221356	0.240627	0.117116
-0.006831	0.017815	0.054844	0.221524	-0.406198	-0.075193	-0.086315	0.043773	0.015991	-0.039228	0.141157	0.064721
-0.122805	0.201577	0.088615	-0.002681	-0.516329	-0.095951	0.095326	-0.005776	0.204572	-0.001742	0.005000	-0.001888
-0.158720	0.148589	0.076232	-0.048118	-0.325231	-0.157512	0.177839	0.031386	0.371239	0.013403	-0.106153	-0.161634
-0.107467	-0.058443	-0.042693	0.208537	-0.042806	-0.226946	0.115765	0.274285	0.442668	0.386500	-0.158705	-0.391712
-0.048731	-0.099390	-0.164223	0.414037	0.049304	-0.262379	0.035901	0.416606	0.394671	0.636500	-0.158327	-0.474017
-0.073049	0.075309	-0.166474	0.287605	-0.054318	-0.250926	0.027953	0.238987	0.201171	0.352409	-0.103885	-0.291450
-0.177052	0.223749	-0.086954	0.020610	-0.132599	-0.215851	0.065046	-0.080851	-0.059566	0.010374	0.026936	-0.020594
-0.227931	0.211724	-0.015311	-0.043536	-0.085016	-0.193661	0.094190	-0.129650	-0.165346	-0.051345	0.176709	0.145560
-0.095121	0.123411	0.050341	0.122975	-0.060458	-0.202609	0.104410	-0.104500	-0.039543	-0.098675	0.203940	0.209931
0.160447	0.054640	0.128390	0.213885	-0.192844	-0.231241	0.096840	0.029134	0.106689	-0.179705	0.073456	0.183733
0.325118	0.010678	0.170791	0.000373	-0.388930	-0.253074	0.062396	0.190921	0.115003	-0.049452	-0.077042	0.002975
0.310148	-0.043417	0.133643	-0.292104	-0.482944	-0.246631	0.015841	0.063293	0.093839	0.166046	-0.143204	-0.233089
0.255507	-0.127940	0.042461	-0.218412	-0.426152	-0.207261	-0.004590	-0.023419	0.124074	0.210364	-0.149253	-0.258903
0.283202	-0.188045	-0.035191	0.177979	-0.256927	-0.149280	-0.006482	0.052782	0.081367	0.127409	-0.107287	0.000357
0.293307	-0.106152	-0.020187	0.330386	-0.062760	-0.090941	-0.039020	0.101206	-0.072033	-0.105491	-0.008989	0.305739
0.142109	0.133557	0.120510	0.016410	0.014755	-0.042981	-0.077613	0.163894	-0.152124	-0.414465	0.059462	0.425125
-0.095121	0.353024	0.279609	-0.305087	-0.073504	-0.002179	-0.029183	0.023128	-0.052766	-0.378494	0.039039	0.361128
-0.184534	0.375572	0.271354	-0.250867	-0.131448	0.040425	0.104410	-0.434455	0.095351	0.125894	0.064379	0.220036
-0.032270	0.238029	0.054093	0.003810	0.075408	0.093773	0.195250	-0.596617	0.147127	0.494076	0.237601	0.028419
0.187393	0.101990	-0.210734	0.160409	0.426655	0.156788	0.178596	-0.005401	0.089682	0.198622	0.365438	-0.198671
0.187393	0.101990	-0.210734	0.160409	0.426655	0.211925	0.178596	0.563433	0.089682	-0.275502	0.365438	-0.198671
0.081480	-0.050930	-0.279377	-0.047355	0.297673	0.228753	0.094947	0.282922	-0.079211	-0.163424	0.048872	0.008961
-0.029652	-0.135078	-0.062948	-0.292868	0.000172	0.182924	0.050284	-0.320716	-0.027076	0.237637	0.081399	0.569961
0.060896	-0.126438	0.161786	-0.366942	-0.104203	0.081600	-0.034859	-0.148794	0.093839	0.151273	0.265968	0.862625
0.201989	0.006545	0.192930	-0.177939	-0.083865	-0.029022	-0.090099	0.577703	0.162622	-0.214919	0.286769	0.512700
0.124519	0.130175	-0.012310	0.099293	-0.051632	-0.082709	-0.027670	0.594976	0.142970	-0.033170	0.102201	-0.164253
-0.171440	0.134685	-0.223488	0.270798	0.006695	-0.040117	0.121064	-0.113884	0.110468	0.434606	-0.045284	-0.537616
-0.394784	0.095978	-0.190480	0.281493	0.065811	0.081958	0.200549	-0.559830	0.130876	0.395970	-0.039235	-0.400691
-0.330811	0.110634	0.031954	0.182181	0.042010	0.216938	0.105167	-0.442713	0.181897	-0.015752	0.021641	-0.038551
-0.078660	0.095602	0.150153	0.118392	-0.042422	0.292126	-0.074208	-0.012158	0.189455	-0.374329	0.084803	0.247356
0.115912	-0.039661	0.008695	0.198606	-0.087702	0.272076	-0.166149	0.217958	0.120672	-0.407649	0.197889	0.364122
0.140238	-0.156114	-0.209984	0.307085	-0.062376	0.167887	-0.149501	0.130110	0.012591	-0.119880	0.322700	0.326323
0.060896	-0.074597	-0.203983	0.248262	0.004776	0.022881	-0.142691	0.127482	-0.104523	0.103546	0.358252	0.218539
-0.009824	0.108755	0.085613	0.000373	0.072720	-0.110268	-0.177878	0.308082	-0.220881	0.076273	0.343123	0.186353
-0.004586	0.142577	0.394806	-0.321887	0.086156	-0.184355	-0.133232	0.248750	-0.263948	0.026656	0.371868	0.287027
0.088965	-0.004349	0.419572	-0.539527	0.052759	-0.177913	0.070345	-0.042938	-0.153635	-0.043015	0.363925	0.416518
0.201989	-0.096385	0.147151	-0.434144	0.098056	-0.104183	0.310315	-0.188584	0.030725	-0.180084	0.186921	0.464422
0.207603	0.024953	-0.163473	-0.035518	0.298824	-0.010053	0.379959	-0.074845	0.122940	0.079682	-0.054735	0.422131
0.078486	0.203080	-0.290629	0.220760	0.490379	0.045080	0.216446	0.283298	0.103665	0.493318	-0.139424	0.304991
-0.012817	0.172265	-0.225738	0.024810	0.428959	0.022523	-0.039020	0.131236	0.077210	0.055061	-0.059272	0.099901
0.106930	-0.070464	-0.064448	-0.329141	0.128383	-0.073761	-0.187337	-0.295191	0.062471	-0.715487	0.014076	-0.168742
0.333726	-0.254537	0.111504	-0.365415	-0.160995	-0.197956	-0.141556	-0.194590	0.015236	-0.499281	-0.010501	-0.387597
0.378636	-0.203072	0.228202	-0.053846	-0.297603	-0.285286	0.017733	-0.089110	-0.029721	0.265667	-0.083847	-0.429497
0.144729	-0.021629	0.236082	0.275764	-0.363988	-0.286717	0.136583	-0.191587	-0.033499	0.484606	-0.123923	-0.289954
-0.146374	0.103494	0.160660	0.399904	-0.436897	-0.194377	0.154372	0.018623	-0.061833	0.144076	-0.100104	-0.136942
-0.244018	0.108755	0.057470	0.383098	-0.472967	-0.043339	0.136961	0.255510	-0.135501	-0.116093	-0.069102	-0.131705
-0.153108	0.045621	-0.025438	0.414419	-0.445339	0.106304	0.122578	0.029134	-0.113589	-0.030898	-0.122032	-0.197923
-0.081279	0.032843	-0.014561	0.542380	-0.380872	0.198678	0.053691	-0.207728	0.073053	0.179682	-0.238856	-0.123474
-0.172188	0.161742	0.130641	0.593182	-0.257695	0.213716	-0.064370	0.016746	0.227626	0.300894	-0.275529	0.063973
-0.337545	0.342126	0.304750	0.427406	-0.021317	0.179344	-0.093126	0.338874	0.150529	0.189909	-0.171560	0.063224
-0.342783	0.365801	0.331392	0.170340	0.268498	0.153565	0.016220	0.242367	-0.044832	0.042182	-0.068724	-0.249550
-0.083524	0.210596	0.169290	0.042380	0.435101	0.185431	0.094190	-0.053073	-0.094322	0.216425	-0.126947	-0.553328
0.248396	0.070047	-0.046819	0.055367	0.408613	0.273508	0.001086	-0.027548	0.048866	0.331576	-0.282335	-0.490478
0.353936	0.054264	-0.160097	0.031684	0.351799	0.364092	-0.138529	0.171026	0.189077	0.140667	-0.334887	-0.193433
0.197124	0.103118	-0.133840	-0.106537	0.430878	0.387364	-0.117341	0.224717	0.149773	0.136122	-0.254735	-0.132827
0.048920	0.180532	-0.058446	-0.198939	0.528767	0.307880	0.033630	0.251379	-0.055788	0.169076	-0.235832	-0.457182
0.113292	0.262832	-0.026564	-0.079428	0.417442	0.150343	0.084728	0.274285	-0.261682	-0.208482	-0.379121	-0.746744
0.276465	0.191430	0.002694	0.100057	0.157173	-0.016137	-0.059073	0.319347	-0.288504	-0.408785	-0.500860	-0.549961
0.338965	-0.129818	0.138896	0.008392	0.022816	-0.115279	-0.219119	0.216456	-0.110567	0.013403	-0.408611	0.007839
0.319130	-0.451381	0.343399	-0.334105	0.046233	-0.100962	-0.189607	-0.154425	0.087036	0.251652	-0.205964	0.373479
0.325118	-0.424334	0.413943	-0.476526	-0.006735	0.022165	-0.004212	-0.371767	0.102910	-0.144870	-0.101238	0.296757
0.288067	-0.079856	0.264225	-0.157320	-0.178263	0.200110	0.143774	-0.141287	-0.039543	-0.292163	-0.072883	0.128344
0.093082	0.214354	0.080735	0.279965	-0.210496	0.355141	0.149830	0.153758	-0.139657	0.128546	0.012185	0.244736
-0.124676	0.230513	0.064600	0.336879	0.038939	0.424958	0.066560	-0.065085	-0.110945	0.151652	0.134349	0.498105
-0.121309	0.071551	0.128765	0.020610	0.399400	0.396315	0.001842	-0.576722	-0.074300	-0.343280	0.240249	0.522805
0.057902	-0.061824	0.048090	-0.206957	0.647768	0.311818	0.040065	-0.478374	-0.126056	-0.473155	0.375272	0.288524
0.109175	-0.061073	-0.142468	-0.064537	0.710341	0.239852	0.176325	0.083188	-0.188391	-0.220599	0.473986	0.012702
-0.108215	0.088462	-0.163098	0.238331	0.614371	0.226963	0.275871	0.159389	-0.145701	-0.037335	0.349175	-0.188944
-0.386180	0.286507	0.078859	0.344901	0.443162	0.266347	0.216825	-0.183329	0.022414	0.034986	0.065892	-0.251420
-0.431073	0.334610	0.310003	0.208155	0.296905	0.307880	0.078293	-0.142788	0.287717	-0.048694	-0.072505	-0.100279
-0.178548	0.157233	0.240960	0.082104	0.204390	0.299645	0.037794	0.308833	0.574565	-0.258842	0.004244	0.110754
0.139115	-0.056565	-0.065573	0.163464	0.130302	0.221951	0.099111	0.572821	0.720067	-0.131239	0.080264	0.094661
0.215088	-0.096385	-0.265498	0.357506	0.052375	0.096279	0.116522	0.395577	0.599886	0.332334	0.072700	-0.103272
0.011875	-0.013740	-0.112835	0.414419	-0.043574	-0.032243	0.052177	-0.006152	0.291118	0.430061	0.118842	-0.138439
-0.163583	0.028334	0.252592	0.263541	-0.158692	-0.116710	0.001086	-0.260281	0.008435	0.050894	0.297359	0.093164
-0.051724	0.035850	0.434206	0.141692	-0.258462	-0.123153	0.006761	-0.003149	-0.104145	-0.138433	0.534122	0.346907
0.193756	0.092595	0.254844	0.287223	-0.342115	-0.047276	0.023411	0.275412	-0.077322	0.209606	0.689568	0.416143
0.236421	0.133933	0.002319	0.548109	-0.416943	0.079809	0.029845	-0.084230	-0.056166	0.723243	0.637753	0.312476
0.050043	0.067793	0.037958	0.493869	-0.365139	0.201184	0.036658	-0.352998	-0.141168	0.662637	0.392670	0.145934
-0.067437	-0.003222	0.287865	0.028247	-0.085016	0.272434	0.027196	0.055035	-0.263570	-0.057403	0.142670	0.024676
0.059399	0.049754	0.360285	-0.323032	0.240475	0.292842	-0.023508	0.551041	-0.271126	-0.370163	0.019371	0.001853
0.257379	0.145583	0.117508	-0.044300	0.363699	0.296064	-0.100315	0.587090	-0.151746	0.262637	-0.061919	0.066218
0.265612	0.150092	-0.124463	0.553839	0.378287	0.311102	-0.142691	0.086566	-0.066366	0.799379	-0.220331	0.179616
0.075118	0.117774	-0.028064	0.603877	0.516866	0.330078	-0.089720	-0.311707	-0.127568	0.468319	-0.420709	0.271308
-0.075293	0.143704	0.292743	-0.134029	0.716099	0.317905	0.049149	-0.031302	-0.238637	-0.100947	-0.538289	0.260455
0.006637	0.143328	0.419197	-0.854151	0.760628	0.248445	0.162321	0.458288	-0.219370	-0.337979	-0.505775	0.181862
0.254385	0.011429	0.212067	-0.746095	0.672337	0.133873	0.148316	0.302825	-0.041055	-0.344037	-0.394622	0.137700
0.426166	-0.124935	-0.002558	-0.058046	0.601703	0.016437	0.052555	-0.278299	0.134278	-0.214541	-0.334509	0.094287
0.371899	-0.056941	0.072105	0.274236	0.519170	-0.062666	-0.013670	-0.324094	0.150906	-0.173268	-0.289896	-0.043789
0.191510	0.161742	0.292367	-0.152357	0.309189	-0.088077	-0.043561	0.147002	0.029214	-0.415980	-0.048686	-0.222240
0.123397	0.247800	0.327639	-0.758313	0.050839	-0.069466	-0.092747	0.416231	-0.067877	-0.420145	0.376406	-0.331854
0.249893	0.084704	0.093118	-0.786950	-0.053551	-0.021864	-0.123016	-0.026422	-0.016876	0.152788	0.584046	-0.335970
0.362543	-0.114416	-0.238867	-0.207339	0.004393	0.040783	-0.051128	-0.500521	0.152040	0.611121	0.329886	-0.184829
0.221825	-0.108782	-0.440667	0.394939	0.008614	0.095921	0.084349	-0.208103	0.327399	0.381197	-0.072505	0.069212
-0.094373	0.051633	-0.360397	0.603877	-0.165216	0.110601	0.158157	0.255510	0.467989	-0.125559	-0.230539	0.101398
-0.265716	0.132806	-0.046068	0.488522	-0.373965	0.054389	0.149830	0.332490	0.593083	-0.297464	-0.207855	-0.263392
-0.151986	0.039232	0.210941	0.268506	-0.432292	-0.073761	0.163456	0.152632	0.633144	-0.086937	-0.224112	-0.639374
0.041810	-0.096760	0.148652	0.077521	-0.376267	-0.230525	0.252025	-0.051197	0.446447	0.145212	-0.203318	-0.606078
0.061645	-0.111411	-0.132340	0.022519	-0.391233	-0.353646	0.329997	-0.082728	0.053779	0.180061	0.006134	-0.321005
-0.092502	-0.000968	-0.292130	0.130615	-0.517480	-0.401248	0.290254	0.216831	-0.293793	0.236879	0.292064	-0.107013
-0.238406	0.117774	-0.188229	0.247498	-0.547411	-0.376553	0.151723	0.382810	-0.376906	0.450137	0.446376	0.093164
-0.264968	0.189551	-0.002558	0.231837	-0.302591	-0.312845	0.039308	0.103083	-0.249215	0.437258	0.409311	0.371233
-0.208103	0.230889	0.055219	0.168048	0.041243	-0.244484	0.040822	0.055785	-0.113589	0.214909	0.178222	0.461054
-0.132532	0.183163	-0.005933	0.196314	0.117250	-0.192945	0.128634	0.256636	-0.034632	0.242940	-0.226002	0.150425
-0.054717	-0.006978	-0.037816	0.232983	-0.123389	-0.167175	0.201306	0.368164	0.083257	0.406576	-0.593488	-0.299307
0.008882	-0.161749	0.038709	0.056512	-0.345953	-0.163596	0.184274	0.257763	0.238586	0.330440	-0.637722	-0.477758
0.019731	-0.054311	0.138896	-0.290577	-0.312184	-0.163954	0.096461	-0.081227	0.266175	0.149758	-0.401049	-0.304918
-0.012817	0.161742	0.112255	-0.358160	-0.113412	-0.139974	0.013571	-0.199470	0.102154	0.134985	-0.225624	0.018688
-0.005334	0.133557	-0.037816	0.156207	0.054678	-0.076982	-0.039020	-0.097368	-0.090167	0.272106	-0.197647	0.319212
0.079983	-0.093380	-0.103083	0.750554	0.071185	0.009276	-0.098423	-0.188584	-0.169502	0.309228	-0.010879	0.513074
0.153337	-0.155363	0.060097	0.577903	-0.060458	0.072291	-0.159717	-0.200596	-0.187258	0.075894	0.418766	0.525051
0.141735	-0.008481	0.284112	-0.302796	-0.162913	0.071575	-0.146474	0.017872	-0.208414	-0.297842	0.654016	0.349527
0.136870	0.044869	0.284863	-0.834678	-0.096528	0.006054	-0.041669	0.133488	-0.160813	-0.410679	0.393048	0.142191
0.246899	-0.061824	0.055594	-0.415052	-0.012491	-0.079487	0.044985	-0.001272	0.026191	-0.220220	-0.004830	0.089048
0.356555	-0.056189	-0.119587	0.277292	-0.081179	-0.121721	0.011680	-0.268539	0.284693	-0.035442	-0.028270	0.198329
0.255507	0.170386	-0.050945	0.323128	-0.127994	-0.081993	-0.093882	-0.334230	0.476303	0.066046	0.296603	0.323703
-0.004212	0.349266	0.131016	-0.182139	0.049304	0.036129	-0.137772	-0.038058	0.516364	0.094076	0.536391	0.328943
-0.116445	0.206462	0.176420	-0.447507	0.267730	0.187221	-0.080261	0.158263	0.423393	-0.040743	0.414984	0.216293
0.050792	-0.146723	0.024825	-0.174502	0.284621	0.305731	-0.006482	-0.021542	0.306991	-0.306930	0.091989	0.166892
0.252139	-0.321028	-0.155971	0.144366	0.223968	0.338671	0.019626	-0.099995	0.275245	-0.573117	-0.012013	0.356263
0.202738	-0.129443	-0.185603	0.051547	0.304582	0.274224	0.044228	0.003608	0.304723	-0.714351	0.312110	0.615245
-0.043120	0.171513	-0.070074	-0.254686	0.436636	0.154281	0.128255	0.075680	0.269954	-0.548505	0.762942	0.547880
-0.187901	0.232017	0.030454	-0.343269	0.374064	0.049018	0.240670	0.108338	0.126719	-0.136919	0.928222	0.163524
-0.073797	0.046748	0.004569	-0.193975	0.095369	0.009634	0.287983	0.020125	-0.010076	0.224379	0.855983	0.003724
0.153337	-0.137332	-0.095206	-0.076755	-0.143343	0.037203	0.215311	0.081311	-0.018765	0.326273	0.863547	0.379467
0.223696	-0.180532	-0.152220	-0.052700	-0.104203	0.087686	0.065046	0.359152	0.088170	0.264531	0.955453	0.917640
0.030208	-0.109533	-0.116211	0.022901	0.130686	0.111675	-0.043561	0.258138	0.209863	0.319834	0.884727	1.106978
-0.254493	0.009551	-0.023188	0.160027	0.223200	0.087328	-0.017076	-0.081977	0.262396	0.413015	0.615438	0.877970
-0.360366	0.088837	0.051467	0.195932	0.016291	0.031832	0.111980	-0.006152	0.210997	0.392561	0.342367	0.455814
-0.218952	0.055767	0.045838	0.033594	-0.241194	-0.016495	0.221745	0.284800	0.079856	0.375516	0.187677	0.050874
-0.021421	-0.037782	-0.034816	-0.223376	-0.250404	-0.022938	0.238021	0.316719	-0.060322	0.421349	0.154772	-0.141058
0.039564	-0.069713	-0.135716	-0.343269	-0.057772	0.018943	0.177839	0.192798	-0.172146	0.416803	0.226633	0.008213
-0.026659	-0.045295	-0.215236	-0.168393	0.100744	0.083390	0.076401	-0.127398	-0.289638	0.216803	0.325347	0.355515
-0.088387	-0.077226	-0.260997	0.197842	0.141051	0.132799	-0.046966	-0.317338	-0.415441	-0.057782	0.320809	0.571832
-0.076041	-0.153485	-0.249369	0.466367	0.104582	0.136379	-0.153663	0.013368	-0.456619	0.046349	0.174061	0.477895
-0.044616	-0.110284	-0.151095	0.462548	-0.010189	0.083032	-0.196039	0.324605	-0.344039	0.552788	-0.059650	0.158658
-0.085768	0.083952	0.030078	0.238713	-0.163297	-0.020074	-0.177878	0.428998	-0.133234	0.706576	-0.364754	-0.169864
-0.177052	0.213978	0.222574	-0.074846	-0.204356	-0.148564	-0.140420	0.206317	0.060203	0.284228	-0.707665	-0.292947
-0.150116	0.111761	0.286363	-0.321505	-0.105354	-0.265601	-0.100693	-0.084980	0.162244	0.031957	-0.886494	-0.134324
0.085971	-0.097512	0.152405	-0.287523	-0.057772	-0.334677	-0.061722	0.165020	0.169047	0.022869	-0.708800	0.115619
0.335597	-0.196685	-0.034065	0.043907	-0.137587	-0.344341	-0.041291	0.286302	0.127097	-0.309202	-0.326191	0.153045
0.317633	-0.148226	-0.060322	0.287987	-0.143727	-0.316066	-0.014427	-0.182953	0.070408	-0.589020	-0.113715	-0.098409
0.059399	-0.031772	0.078484	0.125267	0.012836	-0.290296	0.079807	-0.365761	-0.004787	-0.246725	-0.173072	-0.423138
-0.125050	0.086958	0.222198	-0.166102	0.102279	-0.294949	0.182760	-0.033179	-0.066366	0.168319	-0.224490	-0.595229
-0.056962	0.147462	0.266851	-0.133647	-0.027841	-0.324656	0.129391	0.124479	-0.008187	-0.066869	-0.074017	-0.592984
0.100942	0.151596	0.184675	0.144748	-0.227764	-0.340046	-0.065127	-0.037308	0.204950	-0.426582	0.087072	-0.546594
0.107678	0.214730	0.002319	0.305939	-0.352092	-0.298886	-0.133610	-0.102623	0.436999	-0.257706	-0.015416	-0.554077
-0.037882	0.362419	-0.107584	0.299446	-0.405815	-0.190082	0.055583	0.088443	0.557180	0.078546	-0.351144	-0.582883
-0.123180	0.392858	0.016947	0.226490	-0.351325	-0.044412	0.275492	0.449276	0.593083	0.117561	-0.653979	-0.557070
0.010004	0.165500	0.219572	0.023283	-0.196298	0.088402	0.298959	0.506354	0.588548	0.009996	-0.729216	-0.501327
0.290313	-0.132072	0.190303	-0.229103	-0.140657	0.166097	0.241427	0.046401	0.467989	-0.111549	-0.570425	-0.498334
0.485672	-0.222230	-0.052820	-0.199703	-0.246183	0.175764	0.305016	-0.348119	0.202305	-0.380387	-0.306531	-0.515917
0.422424	-0.062200	-0.206609	0.119156	-0.223543	0.130293	0.413267	-0.254650	-0.063722	-0.601515	-0.103885	-0.423886
0.153711	0.192558	-0.164598	0.280348	0.069649	0.063340	0.372389	0.028008	-0.190280	-0.351231	-0.001805	-0.189318
-0.072300	0.350769	-0.106834	0.059950	0.304198	0.015721	0.209633	0.094449	-0.202747	0.276273	0.131323	0.069586
-0.051724	0.288762	-0.147719	-0.215358	0.202087	0.013930	0.082457	-0.107503	-0.189525	0.544834	0.358630	0.234631
0.148846	0.081321	-0.186728	-0.191685	-0.014794	0.052957	0.002221	-0.244515	-0.191413	0.207334	0.507647	0.287027
0.263741	-0.034401	-0.096331	0.050783	-0.023236	0.093773	-0.098423	0.123728	-0.212947	-0.185006	0.425196	0.273554
0.148097	0.032843	0.123512	0.168812	0.116483	0.091983	-0.145717	0.507481	-0.212569	-0.204696	0.217556	0.258958
-0.059581	0.105748	0.338521	-0.007645	0.185196	0.030042	-0.025021	0.272783	-0.144190	0.145212	0.052654	0.252221
-0.137396	0.050130	0.362911	-0.269577	0.177135	-0.058729	0.174811	-0.058704	-0.095456	0.495212	-0.068346	0.167640
-0.055839	-0.016370	0.129891	-0.272631	0.181742	-0.108836	0.237642	0.024629	-0.203503	0.338773	-0.182146	-0.044911
0.030582	0.037729	-0.181477	0.056512	0.144889	-0.073761	0.107817	0.180785	-0.376529	-0.183113	-0.242259	-0.227851
0.021228	0.143704	-0.292880	0.463693	0.026271	0.036129	-0.064749	0.061041	-0.353106	-0.322454	-0.234698	-0.153403
-0.012443	0.174519	-0.133840	0.652005	-0.062760	0.155714	-0.152528	-0.234004	-0.109812	0.161122	-0.204830	0.133958
0.029834	0.115895	0.089365	0.497307	-0.106505	0.213358	-0.192255	-0.146167	0.077210	0.548243	-0.154546	0.304991
0.124145	-0.000968	0.179047	0.123357	-0.250788	0.177554	-0.261495	0.239362	0.009569	0.197106	-0.097458	0.160530
0.177663	-0.164003	0.184300	-0.141665	-0.431524	0.073007	-0.325437	0.314090	-0.207658	-0.373950	-0.101994	-0.092049
0.150717	-0.301118	0.272480	-0.087828	-0.338662	-0.035107	-0.292520	0.043023	-0.338750	-0.438319	-0.119008	-0.094294
0.053037	-0.259045	0.444713	0.094710	0.051991	-0.072329	-0.158203	-0.161932	-0.283215	-0.161530	-0.015794	0.191967
-0.087639	-0.006227	0.520885	0.105787	0.362932	0.006054	-0.006860	-0.259155	-0.167235	-0.073306	0.126028	0.436353
-0.189023	0.227507	0.385801	-0.018336	0.409765	0.186147	0.102139	-0.196467	-0.160435	-0.122909	0.117329	0.405290
-0.146749	0.206462	0.111504	-0.042391	0.438939	0.398821	0.159293	-0.056827	-0.224659	0.099379	0.080264	0.256712
0.018235	0.040735	-0.162347	0.063388	0.616674	0.549197	0.136961	-0.137908	-0.175924	0.477788	0.253108	0.187102
0.139115	0.032843	-0.330014	0.099675	0.762548	0.564951	0.021897	0.032512	0.019769	0.451652	0.438812	0.089796
0.111795	0.202328	-0.314636	-0.078664	0.724544	0.437847	-0.088585	0.278416	0.223847	0.144076	0.271263	-0.113373
0.044429	0.271851	-0.129339	-0.360069	0.586348	0.232334	-0.043182	0.149254	0.368971	0.092182	-0.086115	-0.185203
0.103561	0.131678	0.072480	-0.435289	0.399400	0.051166	0.153237	0.022002	0.467989	0.133470	-0.156437	-0.044911
0.272349	-0.020502	0.148277	-0.145102	0.108805	-0.025085	0.296310	-0.003149	0.473280	0.067561	0.058706	-0.056883
0.365163	-0.028391	0.131392	0.240241	-0.177879	0.013572	0.241427	-0.024545	0.371617	0.156955	0.153638	-0.372633
0.274968	0.033219	0.120135	0.309377	-0.251171	0.103082	0.113494	-0.090986	0.287339	0.294834	0.026179	-0.551458
0.092334	0.056143	0.108127	0.037796	-0.150250	0.157862	0.121821	-0.105251	0.281670	0.093697	-0.071371	-0.298184
-0.016932	0.041111	0.049966	-0.200085	-0.103435	0.124206	0.232343	0.116221	0.259372	-0.174404	-0.048308	0.018314
0.021602	0.013683	-0.019062	-0.120665	-0.165600	0.015363	0.216446	0.315592	0.190589	-0.041121	-0.052467	0.011580
0.146226	-0.021253	-0.043818	0.161173	-0.214333	-0.102394	0.008653	0.163143	0.170559	0.263394	-0.139424	-0.170238
0.202738	-0.006603	-0.033690	0.329622	-0.179798	-0.156438	-0.176743	0.153758	0.183408	0.303925	-0.219197	-0.253291
0.068756	0.115143	-0.013810	0.271562	-0.045492	-0.115636	-0.135123	0.628022	0.117271	0.127409	-0.255870	-0.241319
-0.195757	0.256068	0.019198	0.194404	0.164851	-0.002895	0.080564	0.462419	0.024302	0.102409	-0.272127	-0.175102
-0.370093	0.268093	0.050716	0.294098	0.291914	0.122416	0.259595	-0.245266	0.052645	0.278925	-0.225624	0.029916
-0.313602	0.195564	0.055219	0.452234	0.197481	0.202616	0.263002	-0.286181	0.159977	0.036122	-0.049442	0.348778
-0.134029	0.211724	0.066851	0.428552	0.001323	0.207629	0.111980	0.145875	0.175094	-0.712458	0.202049	0.572955
-0.028903	0.281622	0.145275	0.208919	-0.079260	0.143182	-0.064749	0.339625	0.076832	-0.847634	0.395695	0.549751
-0.019925	0.194437	0.242836	0.002283	-0.007119	0.046154	-0.144204	-0.006527	-0.021787	0.070591	0.516346	0.332311
0.036570	-0.042666	0.222198	-0.014900	0.123008	-0.037254	-0.122638	-0.489260	-0.088656	0.836879	0.640779	0.087176
0.186271	-0.193304	0.075482	0.155061	0.188651	-0.071613	-0.105233	-0.389785	-0.162702	0.530440	0.700536	-0.035184
0.285822	-0.179030	-0.008559	0.365145	0.063891	-0.054076	-0.140799	0.225468	-0.201614	-0.330784	0.534122	0.044886
0.231555	-0.142591	0.125388	0.438101	-0.178263	-0.016495	-0.132853	0.475562	-0.096211	-0.714351	0.202428	0.285904
0.133501	-0.144093	0.392555	0.281493	-0.228915	0.002832	0.021140	-0.063209	0.149773	-0.301250	-0.057760	0.493239
0.136870	-0.113290	0.554281	-0.014900	-0.003666	-0.008979	0.261109	-0.630025	0.349319	0.289531	-0.183280	0.455440
0.202738	-0.058443	0.469853	-0.164575	0.170609	-0.026517	0.421594	-0.295191	0.288851	0.258470	-0.255492	0.186353
0.190013	-0.034401	0.267227	0.029774	0.104198	-0.005758	0.414781	0.586339	-0.035766	-0.342901	-0.217684	-0.057257
0.064639	0.026455	0.229703	0.287605	0.053527	0.075513	0.284955	0.505228	-0.371617	-0.497767	0.036391	-0.032191
-0.090632	0.195564	0.422198	0.124121	0.233949	0.206555	0.110088	-0.370641	-0.443775	0.233470	0.402125	0.277670
-0.175929	0.347387	0.529516	-0.368851	0.476943	0.355857	-0.054911	-0.487758	-0.238637	0.818318	0.633971	0.634706
-0.134029	0.322208	0.257095	-0.557473	0.588651	0.489047	-0.139285	-0.014034	-0.001387	0.577788	0.571565	0.686727
0.015990	0.193309	-0.245618	-0.193212	0.628191	0.580346	-0.063235	0.276538	0.080990	0.168697	0.231550	0.306862
0.161570	0.138819	-0.579077	0.273854	0.672337	0.611138	0.128634	0.395953	0.105933	-0.007422	-0.180255	-0.190066
0.202364	0.128296	-0.558446	0.372403	0.628191	0.567457	0.226287	0.194300	0.260128	-0.111171	-0.395756	-0.406303
0.166435	0.004291	-0.309759	0.083250	0.416291	0.441786	0.072237	-0.189710	0.467233	-0.136919	-0.322788	-0.352056
0.166061	-0.186167	-0.058446	-0.313105	0.124160	0.249519	-0.214200	-0.118013	0.458163	-0.069520	-0.073261	-0.284716
0.219953	-0.230119	0.049215	-0.479581	-0.102668	0.034697	-0.365543	0.138368	0.178117	-0.072170	0.234954	-0.252543
0.197498	-0.097136	0.024825	-0.252013	-0.204740	-0.141406	-0.295547	-0.083103	-0.115478	-0.086937	0.522019	-0.112251
0.008134	0.018566	-0.013435	0.156589	-0.204740	-0.231957	-0.159717	-0.482127	-0.197458	0.161500	0.666497	0.175500
-0.203239	0.000535	-0.012310	0.366291	-0.165216	-0.228378	-0.109773	-0.321842	-0.098856	0.456955	0.573078	0.497730
-0.209599	-0.061449	-0.019812	0.265451	-0.172507	-0.162165	-0.113935	0.311086	0.033370	0.348621	0.282231	0.665769
-0.044242	-0.040412	-0.047194	0.063388	-0.241194	-0.084498	-0.058695	0.712513	0.100264	-0.115336	-0.061163	0.498853
0.022724	0.084704	-0.033690	-0.038954	-0.241578	-0.035822	0.093812	0.396328	0.073431	-0.522000	-0.329972	0.045634
-0.113453	0.244418	0.019198	-0.060337	-0.082714	-0.022222	0.294796	-0.172067	-0.011587	-0.689739	-0.489896	-0.338214
-0.239528	0.318826	0.021073	-0.121429	0.081166	-0.013632	0.452631	-0.301196	-0.086767	-0.613253	-0.546985	-0.337092
-0.145626	0.203456	-0.080577	-0.174121	0.057749	0.028968	0.454145	-0.025671	-0.131723	-0.236502	-0.422977	-0.014234
0.085223	-0.038534	-0.219362	-0.009172	-0.046260	0.119910	0.243698	0.312588	-0.166857	0.256197	-0.061919	0.279916
0.182528	-0.150480	-0.288004	0.356360	0.025120	0.233050	-0.060587	0.300571	-0.155902	0.533091	0.301898	0.238374
0.002522	0.037729	-0.248994	0.585542	0.232797	0.311102	-0.236145	0.032137	-0.026699	0.581576	0.287526	-0.119733
-0.278062	0.340998	-0.128214	0.495779	0.254678	0.297497	-0.195282	0.207819	0.189455	0.446728	-0.109178	-0.424634
-0.297889	0.402253	0.039084	0.267742	-0.033980	0.167529	-0.050750	0.585964	0.330423	0.156197	-0.467968	-0.384604
0.080358	0.145959	0.190303	0.043907	-0.345569	-0.053002	0.078672	0.271281	0.282804	-0.139190	-0.481200	-0.182210
0.547798	-0.146347	0.240585	-0.224140	-0.342115	-0.290654	0.192601	-0.301947	0.125207	-0.275124	-0.213147	-0.136568
0.678037	-0.238759	0.202311	-0.439489	-0.078109	-0.462809	0.290254	-0.270040	0.002013	-0.116850	0.174440	-0.157519
0.426166	-0.186167	0.206814	-0.362360	0.109189	-0.518643	0.275492	-0.062833	-0.093945	0.239152	0.571943	-0.003010
0.135747	-0.125310	0.325013	-0.029027	0.080014	-0.462809	0.091541	-0.071091	-0.255259	0.547485	0.807571	0.181488
0.074370	-0.054687	0.454844	0.201661	0.013987	-0.346130	-0.131340	-0.162683	-0.413929	0.662637	0.734954	0.105889
0.151091	0.038105	0.455970	0.090890	0.056981	-0.228736	-0.195282	-0.122893	-0.382951	0.680440	0.394939	-0.159389
0.139115	0.061028	0.302499	-0.179848	0.147960	-0.146775	-0.082153	0.371169	-0.150613	0.433849	-0.123166	-0.359539
0.012249	-0.009232	0.089741	-0.227576	0.209765	-0.098099	0.040065	0.869103	0.107445	-0.312231	-0.788573	-0.438102
-0.077164	-0.020502	-0.030314	0.021756	0.210148	-0.051928	0.091162	0.705754	0.321730	-0.910489	-1.429057	-0.453067
-0.062199	0.108755	0.036457	0.202807	0.076943	0.021091	0.189573	0.131611	0.546220	-0.612875	-1.712026	-0.441843
-0.015061	0.216609	0.190303	0.071027	-0.148332	0.124922	0.383744	-0.095116	0.659977	-0.024840	-1.504415	-0.489355
0.024220	0.148589	0.211692	-0.101956	-0.222775	0.235556	0.465500	0.082812	0.412433	-0.067248	-1.004415	-0.599344
0.075867	0.015561	0.018448	-0.003445	-0.054318	0.319695	0.243698	-0.082353	-0.138523	-0.348202	-0.436966	-0.549961
0.095702	0.017064	-0.248994	0.228017	0.084621	0.351202	-0.143447	-0.463359	-0.551066	-0.236502	0.099175	-0.201664
0.015990	0.141073	-0.404283	0.347956	-0.035132	0.321127	-0.401866	-0.454725	-0.513665	0.123243	0.499704	0.206188
-0.091754	0.221119	-0.347269	0.354450	-0.240427	0.237346	-0.419270	-0.176572	-0.181969	0.499758	0.646073	0.346907
-0.096992	0.177150	-0.109459	0.252464	-0.248485	0.128503	-0.252414	-0.102623	0.081367	0.545591	0.553411	0.181862
-0.027407	0.082825	0.116007	0.030156	-0.078493	0.041857	0.048770	0.024254	0.099886	-0.001742	0.346149	-0.128338
-0.033767	0.042614	0.113005	-0.065300	0.056981	0.024314	0.372767	0.403838	-0.022165	-0.352367	0.132079	-0.404432
-0.150116	0.079067	-0.074200	0.161554	0.094601	0.094489	0.491995	0.356523	-0.065988	0.151273	-0.003696	-0.432116
-0.244018	0.115519	-0.165723	0.417093	0.126079	0.223741	0.320913	-0.194965	0.040929	0.484606	-0.006720	-0.090553
-0.193886	0.073430	-0.047569	0.378896	0.154870	0.345116	0.103653	-0.396542	0.136923	-0.025597	0.084046	0.374976
-0.015435	-0.020502	0.090491	0.210829	0.126847	0.389154	0.110466	0.043773	0.084769	-0.398940	0.148343	0.511578
0.167933	-0.060697	0.083737	0.113426	0.148728	0.319695	0.253539	0.500722	0.004658	-0.110035	0.093502	0.206563
0.239415	-0.011486	0.025951	-0.059955	0.320321	0.156430	0.238021	0.466174	0.070408	0.197485	-0.067590	-0.166871
0.202738	0.022323	0.079234	-0.347469	0.423584	-0.039044	0.028331	0.213076	0.229138	0.074379	-0.232051	-0.238701
0.184774	-0.054311	0.221448	-0.481872	0.223968	-0.196166	-0.110908	0.164269	0.326265	-0.217948	-0.325435	-0.052019
0.259624	-0.148226	0.282236	-0.384124	-0.020550	-0.269896	-0.041669	0.232228	0.326265	-0.445135	-0.345473	0.144063
0.315388	-0.086242	0.167414	-0.239031	0.089227	-0.253790	0.060125	0.089194	0.266553	-0.453465	-0.209745	0.267566
0.203112	0.091844	-0.030314	-0.062628	0.378671	-0.176839	0.024168	-0.286932	0.160733	0.031200	0.231928	0.352146
-0.023666	0.162494	-0.140592	0.225726	0.348344	-0.089509	-0.068911	-0.574470	0.032237	0.705819	0.821187	0.357012
-0.160965	0.104621	-0.074576	0.415565	-0.020933	-0.040117	-0.091991	-0.386782	-0.102256	0.756197	1.096942	0.291892
-0.126172	0.157609	0.129516	0.251318	-0.293765	-0.047276	-0.095396	0.200309	-0.242415	0.102031	0.936543	0.321832
-0.035263	0.357533	0.342649	-0.074082	-0.272276	-0.084856	-0.148744	0.395202	-0.322505	-0.343280	0.714909	0.492116
0.014119	0.381584	0.406814	-0.149302	-0.144495	-0.101320	-0.151393	0.110590	-0.259793	-0.125559	0.619977	0.602521
0.079235	0.068920	0.264225	0.057658	-0.063528	-0.055865	0.001842	-0.173944	-0.138523	0.106197	0.439568	0.561353
0.215837	-0.263177	0.028577	0.228399	-0.005584	0.047586	0.212661	-0.226497	-0.134745	0.100515	0.155529	0.511952
0.318382	-0.283462	-0.133090	0.218850	0.034717	0.159652	0.318642	0.147752	-0.214081	0.330440	0.010673	0.473404
0.253262	-0.093755	-0.139467	0.165756	0.027423	0.214790	0.317885	0.313339	-0.142301	0.669834	-0.032807	0.326697
0.086346	0.033971	-0.013810	0.140928	0.023968	0.171109	0.281170	-0.024920	0.130876	0.610743	-0.175340	0.197206
0.011875	0.059149	0.137771	0.065680	0.037788	0.041857	0.173676	0.030260	0.352720	0.116803	-0.279310	0.267940
0.082229	0.081321	0.183924	-0.046973	-0.059306	-0.102752	-0.034480	0.584837	0.325888	-0.281182	-0.150009	0.270185
0.153337	0.106500	0.125763	-0.091265	-0.265369	-0.170755	-0.193769	0.931814	0.180385	-0.037714	-0.015416	-0.145173
0.102439	0.112889	0.096120	-0.058046	-0.301056	-0.102752	-0.129070	0.625018	0.141836	0.358091	-0.112580	-0.665188
-0.029278	0.147838	0.113380	0.047345	-0.034364	0.090909	0.093433	-0.124770	0.210619	0.189152	-0.196512	-0.670799
-0.132906	0.207590	0.040960	0.268124	0.250456	0.325782	0.234236	-0.615386	0.255971	-0.178191	0.022775	-0.184080
-0.172188	0.219615	-0.119962	0.460256	0.311492	0.487973	0.179353	-0.338359	0.290740	-0.071792	0.349931	0.206188
-0.166951	0.195940	-0.183353	0.326184	0.313795	0.497998	0.027196	0.110966	0.394671	0.394834	0.420279	0.194212
-0.117568	0.201201	-0.109084	-0.079046	0.436636	0.358721	-0.096909	0.041521	0.468745	0.760743	0.225877	-0.013860
-0.009076	0.168882	-0.068199	-0.298214	0.509573	0.155355	-0.169932	0.003608	0.343650	0.657712	0.028827	-0.141432
0.134250	0.004291	-0.115836	-0.155029	0.316483	0.000326	-0.204741	0.180410	0.087792	0.132334	-0.027136	-0.108884
0.253262	-0.167384	-0.104583	0.019083	-0.019015	-0.041191	-0.161987	0.103083	-0.047099	-0.215677	0.000841	0.015321
0.295552	-0.160998	0.037583	-0.003827	-0.180949	0.015721	0.001464	-0.044064	0.004658	-0.027490	0.029961	0.109631
0.238666	-0.057316	0.183549	-0.045827	-0.065446	0.096279	0.237642	0.137993	0.053401	0.248243	0.035256	0.110754
0.105807	-0.034401	0.198183	0.043907	0.095753	0.128861	0.417052	0.561180	-0.030099	0.131955	-0.013526	0.056862
-0.023666	-0.026513	0.109628	0.178361	0.063891	0.089118	0.444682	0.465048	-0.120012	-0.133511	-0.148875	-0.003385
-0.076041	0.095226	0.079984	0.294098	-0.052399	0.002116	0.334917	-0.246767	-0.037654	-0.217570	-0.299726	-0.061746
-0.053595	0.200450	0.215069	0.362471	-0.000212	-0.080203	0.172540	-0.368389	0.180385	-0.307687	-0.339423	-0.090553
-0.009824	0.124538	0.392555	0.227635	0.170993	-0.106331	0.033630	0.112843	0.321352	-0.479213	-0.264565	-0.052767
0.041061	-0.003222	0.391429	-0.124101	0.208997	-0.051570	-0.034102	0.119224	0.265797	-0.398183	-0.178365	0.014199
0.120777	-0.005100	0.226326	-0.339069	0.089611	0.069784	-0.012535	-0.164185	0.127475	-0.026733	-0.103885	0.053119
0.210971	0.020820	0.126889	-0.154647	0.008997	0.207629	0.048770	-0.084230	0.098374	0.258849	0.027314	0.113748
0.235298	-0.071967	0.158409	0.171868	0.074256	0.300361	0.049906	0.028758	0.212887	0.294076	0.254999	0.299377
0.143980	-0.160247	0.161035	0.240622	0.255830	0.304299	-0.016319	0.045275	0.313038	0.077788	0.545847	0.530664
-0.019551	-0.061824	0.072105	0.054221	0.462356	0.219086	-0.003833	-0.018539	0.236696	-0.220978	0.756890	0.533284
-0.151986	0.124538	-0.010810	-0.099665	0.550264	0.088402	0.182003	-0.202473	0.016747	-0.142220	0.710370	0.231637
-0.167325	0.159488	-0.059947	-0.096610	0.464275	-0.024369	0.369361	-0.175070	-0.146079	0.342182	0.499326	-0.007126
-0.058458	0.037729	-0.122588	-0.061100	0.325696	-0.071256	0.291768	0.049029	-0.124923	0.647485	0.483819	0.146682
0.094579	-0.032147	-0.149969	-0.115701	0.208997	-0.051928	-0.035994	0.180410	-0.013854	0.435364	0.717178	0.429242
0.183651	0.006170	-0.060697	-0.224522	0.024352	-0.005400	-0.295169	0.203313	0.042819	0.074379	0.771641	0.388449
0.171301	0.008048	0.074731	-0.284850	-0.243881	0.017511	-0.259981	-0.026422	0.063983	0.073243	0.435786	0.153045
0.095328	-0.040412	0.090491	-0.217649	-0.434211	-0.006832	-0.057182	-0.205476	0.127097	0.247106	0.052276	0.168763
-0.010946	0.026079	-0.062573	0.046199	-0.433059	-0.062308	0.048013	0.165395	0.160355	0.206955	-0.115605	0.356263
-0.126921	0.211348	-0.253870	0.484320	-0.301056	-0.108478	0.000707	0.452656	0.059448	0.217940	-0.243771	0.276173
-0.198002	0.300788	-0.319512	0.811669	-0.173658	-0.112415	-0.036750	0.207443	-0.087900	0.352031	-0.429027	-0.023213
-0.187153	0.232768	-0.233990	0.669576	-0.167134	-0.069824	0.032495	-0.118389	-0.132101	0.199379	-0.431295	-0.098409
-0.132158	0.180156	-0.119962	0.146658	-0.284556	-0.001821	0.091162	-0.196091	-0.113967	-0.021432	-0.169291	0.103269
-0.070804	0.212099	-0.085078	-0.181375	-0.403512	0.057969	-0.002698	-0.066587	-0.146835	-0.005529	0.082912	0.258958
0.024595	0.206838	-0.090329	0.033976	-0.422315	0.081600	-0.168419	0.119224	-0.172146	-0.104734	0.137753	0.276548
0.165687	0.110634	-0.021687	0.432372	-0.353243	0.056895	-0.192634	0.343005	-0.074300	-0.326998	0.079129	0.272057
0.275717	0.018191	0.133268	0.449179	-0.232752	-0.008263	-0.049614	0.325731	0.100642	-0.218327	-0.008989	0.212551
0.273471	-0.006978	0.241711	0.071409	-0.061609	-0.092014	0.048770	-0.137908	0.236318	0.054303	-0.090274	0.079317
0.180283	-0.009232	0.208315	-0.207721	0.142586	-0.169681	-0.017454	-0.612758	0.313794	0.057712	-0.021087	0.019437
0.099819	-0.029142	0.121636	-0.098901	0.324928	-0.223725	-0.096531	-0.462608	0.336469	-0.113821	0.247057	0.008961
0.097199	-0.003222	0.137395	0.117246	0.397865	-0.248063	-0.026535	0.212701	0.256727	-0.118744	0.424061	-0.150036
0.129759	0.141073	0.270228	0.009537	0.320321	-0.245558	0.115765	0.459415	0.107823	-0.131996	0.251595	-0.306415
0.129385	0.272979	0.385050	-0.371906	0.212068	-0.221578	0.169891	0.171776	0.033748	-0.255434	-0.022599	-0.069602
0.119280	0.151596	0.368540	-0.506308	0.199784	-0.175765	0.138854	0.063668	0.081745	-0.035063	0.034122	0.434856
0.163816	-0.141088	0.258596	-0.128302	0.185964	-0.102394	0.130526	0.162017	0.119538	0.414909	0.373002	0.596533
0.210597	-0.191051	0.203812	0.320072	0.071569	-0.000389	0.180489	0.114344	0.058692	0.367182	0.556058	0.240245
0.133501	0.109131	0.257470	0.281111	0.030878	0.120268	0.250890	-0.087233	0.014480	-0.257327	0.420279	-0.109258
-0.034515	0.316947	0.258596	-0.088592	0.156022	0.242359	0.301609	-0.121392	0.124074	-0.442485	0.219069	0.005220
-0.049105	0.097105	0.066101	-0.190157	0.161396	0.340461	0.273222	0.029884	0.322108	0.206197	0.174061	0.433733
0.227813	-0.284589	-0.173225	0.044289	-0.104970	0.385932	0.114251	0.171401	0.409788	0.700894	0.270128	0.739497
0.546301	-0.378879	-0.212610	0.105023	-0.296451	0.359079	-0.090477	0.203688	0.281292	0.411500	0.434273	0.703943
0.507753	-0.150480	-0.062948	-0.152738	-0.123006	0.270286	-0.143826	0.063293	0.018636	-0.045287	0.598418	0.416892
0.094205	0.079818	0.073606	-0.226049	0.174832	0.163590	0.007139	-0.108254	-0.183102	-0.068005	0.629810	0.108509
-0.277313	0.100863	0.107377	0.164228	0.232413	0.095563	0.146424	0.046776	-0.174035	0.099000	0.475499	0.004098
-0.309861	0.036601	0.073981	0.560714	0.091530	0.101650	0.068074	0.269404	-0.005543	0.074000	0.322700	0.190470
-0.189023	0.100487	-0.024688	0.482410	0.071569	0.169319	-0.101071	0.128233	0.111602	0.064152	0.351822	0.474527
-0.233542	0.247049	-0.180352	0.141692	0.303047	0.250594	-0.068154	-0.190085	0.062849	0.240288	0.406285	0.506338
-0.398900	0.249679	-0.272625	0.009919	0.552951	0.293916	0.172540	-0.172067	-0.038788	0.261122	0.207723	0.220036
-0.379072	0.088837	-0.184853	0.050401	0.507269	0.278878	0.298581	0.193549	-0.037654	0.009996	-0.168535	-0.032565
-0.086517	-0.015994	0.014697	-0.082483	0.149112	0.221951	0.123335	0.452280	0.074565	-0.155094	-0.379499	-0.007126
0.215837	0.021572	0.146026	-0.363506	-0.215101	0.157146	-0.134367	0.333241	0.193612	-0.066491	-0.334887	0.072955
0.274594	0.053512	0.120135	-0.446362	-0.274963	0.111317	-0.180526	-0.067713	0.212887	0.256197	-0.248686	-0.049026
0.136495	-0.003222	-0.035941	-0.232540	-0.001363	0.091983	-0.044317	-0.215611	0.088548	0.473621	-0.216172	-0.234586
0.004392	-0.032899	-0.266624	0.078285	0.330686	0.087328	0.038929	0.109840	-0.097722	0.219455	-0.147363	-0.272371
-0.038256	0.059901	-0.450044	0.303648	0.396713	0.071575	0.000707	0.277290	-0.171013	-0.051723	-0.076664	-0.225233
-0.039379	0.176023	-0.403158	0.290661	0.169841	0.011424	-0.021994	0.092948	-0.044077	0.063394	-0.143960	-0.202786
-0.006083	0.147086	-0.121087	-0.057282	-0.058155	-0.115636	0.032873	-0.026046	0.165268	0.185364	-0.297458	-0.179591
0.116660	-0.023507	0.122011	-0.465071	-0.090389	-0.298170	0.058990	0.210448	0.265041	0.050894	-0.343960	-0.195678
0.299669	-0.150855	0.118259	-0.432234	-0.091156	-0.487863	0.003734	0.409847	0.197392	-0.062326	-0.241125	-0.333725
0.386495	-0.119676	0.024075	0.050401	-0.274579	-0.618500	-0.023886	0.099329	0.048866	-0.008179	-0.115227	-0.464664
0.265986	-0.026137	0.103249	0.400286	-0.526306	-0.645701	0.045742	-0.264034	-0.090922	-0.130103	-0.045284	-0.386101
0.021602	0.023826	0.326889	0.289133	-0.601517	-0.568750	0.102518	-0.292938	-0.181213	-0.479970	-0.007098	-0.154152
-0.154979	0.077939	0.436457	0.072173	-0.531294	-0.425586	0.052934	-0.132653	-0.179324	-0.559486	0.008781	0.025425
-0.177052	0.178277	0.308502	0.160409	-0.484479	-0.267032	0.004112	0.117347	-0.063722	-0.077850	-0.059272	0.093164
-0.123554	0.225628	0.071729	0.417475	-0.401977	-0.128521	0.093433	0.271281	0.085903	0.424758	-0.249064	0.067341
-0.091380	0.166252	-0.080577	0.479354	-0.181333	-0.022580	0.257703	0.156011	0.147883	0.290667	-0.489896	-0.107013
-0.066315	0.113640	-0.059197	0.323128	-0.000980	0.051166	0.332646	0.112843	0.115003	-0.216055	-0.646418	-0.410792
0.020479	0.123411	0.100998	0.203571	-0.035899	0.093415	0.297067	0.125605	0.102910	-0.406135	-0.630161	-0.624784
0.157828	0.081697	0.273230	0.195932	-0.121854	0.104872	0.250133	0.016371	0.175472	-0.191822	-0.455114	-0.550710
0.241660	-0.044168	0.320510	0.128705	-0.057388	0.090193	0.213418	-0.023043	0.237452	-0.080879	-0.209745	-0.243938
0.196376	-0.087745	0.221823	-0.037809	0.093066	0.058327	0.131284	-0.069590	0.164134	-0.063083	0.032231	0.081937
0.080358	0.031340	0.073230	-0.084010	0.220897	0.021449	0.020761	-0.154800	-0.018765	0.164531	0.279961	0.267566
0.024969	0.153099	-0.044943	0.099293	0.308421	-0.008621	-0.030697	-0.178073	-0.178946	0.358470	0.534878	0.263823
0.059399	0.163997	-0.110960	0.286459	0.275024	-0.024011	-0.010644	-0.000521	-0.244303	0.196349	0.682004	0.118988
0.092334	0.160991	-0.061072	0.223816	0.093450	-0.023654	0.012058	0.469178	-0.229948	-0.086559	0.606739	-0.023213
0.090088	0.189927	0.162161	-0.047736	-0.048946	-0.009695	0.013571	0.632903	-0.158924	-0.035063	0.357496	-0.046033
0.139115	0.132806	0.409065	-0.293632	-0.051248	0.024314	0.023032	0.187542	-0.067877	0.199379	0.068918	-0.001888
0.261121	-0.008481	0.409816	-0.323032	-0.077726	0.095921	0.027574	-0.142037	-0.020654	0.202031	-0.174206	0.000731
0.315013	-0.056189	0.135895	-0.087828	-0.162146	0.216938	-0.001563	-0.041437	-0.031610	0.009996	-0.323923	-0.017601
0.204235	0.015937	-0.132340	0.228399	-0.050864	0.372684	-0.005725	-0.102623	-0.035766	-0.233851	-0.382146	0.004098
0.043681	0.044493	-0.178101	0.265069	0.308421	0.519480	0.082457	-0.414185	0.014858	-0.384552	-0.439235	0.003349
-0.004586	-0.004724	-0.081327	-0.085155	0.570993	0.603619	0.160428	-0.365386	0.096863	-0.252026	-0.524301	-0.083070
0.050417	-0.003597	-0.022062	-0.412379	0.497289	0.592162	0.044228	0.013368	0.154308	-0.026354	-0.492543	-0.178095
0.085223	0.064411	-0.049444	-0.310432	0.299592	0.496566	-0.230091	0.200684	0.108956	-0.080879	-0.260406	-0.198297
0.050792	0.097105	-0.089579	0.011065	0.304966	0.366240	-0.371976	0.115470	-0.092433	-0.253162	0.004622	-0.166497
-0.001593	0.077188	-0.072700	0.058422	0.516482	0.260261	-0.194147	-0.026046	-0.358017	-0.091860	0.140400	-0.081574
-0.032645	0.044493	-0.011935	-0.189393	0.657365	0.216222	0.136204	-0.255401	-0.482309	0.234985	0.227768	0.113374
-0.047609	-0.032147	-0.001432	-0.326087	0.561012	0.231976	0.315614	-0.301947	-0.374640	0.306576	0.359008	0.322206
-0.040127	-0.125310	-0.095956	-0.148538	0.370609	0.271718	0.273979	-0.027548	-0.139657	0.144076	0.385105	0.304616
-0.007205	-0.055063	-0.192730	0.186383	0.294602	0.288904	0.186923	0.024629	0.096107	-0.072549	0.133214	0.027296
-0.005334	0.232017	-0.134966	0.460256	0.287308	0.256322	0.171783	-0.211482	0.280158	-0.233851	-0.246796	-0.245809
-0.066689	0.425177	0.057846	0.522899	0.151799	0.181850	0.149073	-0.161932	0.350075	-0.261493	-0.415794	-0.362158
-0.093999	0.210972	0.191429	0.339935	-0.146413	0.104872	0.018869	0.237860	0.252947	-0.024840	-0.289896	-0.477384
0.011875	-0.211712	0.183174	0.137490	-0.429990	0.068710	-0.157068	0.463546	0.079100	0.511879	-0.138289	-0.646856
0.140238	-0.352208	0.182048	0.211593	-0.490619	0.091625	-0.228956	0.229599	-0.016121	0.697106	-0.195000	-0.597848
0.078112	-0.120051	0.311504	0.471333	-0.251939	0.158936	-0.144204	-0.049695	-0.008565	0.036879	-0.371182	-0.216254
-0.152360	0.104621	0.457471	0.556130	0.111876	0.233050	0.014328	0.110590	0.035260	-0.645438	-0.455492	0.129093
-0.261227	0.081321	0.457846	0.423969	0.275792	0.276372	0.126363	0.260767	0.111224	-0.463689	-0.401427	0.105140
-0.068933	-0.043417	0.345275	0.316253	0.184429	0.267779	0.122957	-0.056827	0.195880	0.050516	-0.254357	-0.108510
0.228561	-0.083237	0.247714	0.205481	0.192490	0.210851	0.009409	-0.408179	0.136545	0.014161	-0.005964	-0.205405
0.291810	-0.018624	0.189553	-0.092410	0.514563	0.134231	-0.148744	-0.298194	-0.130212	-0.334950	0.298116	-0.199419
0.069879	0.116271	0.137020	-0.342505	0.836252	0.077303	-0.278521	0.112092	-0.375395	-0.176298	0.493275	-0.139187
-0.149741	0.239908	0.120510	-0.169921	0.819362	0.069426	-0.355706	0.305453	-0.343661	0.490288	0.515589	0.157536
-0.121309	0.221119	0.185425	0.169576	0.618978	0.112749	-0.362138	0.051281	-0.127945	0.843697	0.467556	0.668015
0.075492	0.077563	0.298746	0.053075	0.526463	0.180776	-0.219497	-0.239260	-0.039921	0.435364	0.354092	0.919886
0.206106	-0.022756	0.353906	-0.468126	0.486540	0.234124	0.101003	-0.069590	-0.149101	-0.297085	0.060975	0.613748
0.201241	-0.058443	0.262348	-0.663238	0.331454	0.243791	0.413267	0.227346	-0.206147	-0.729876	-0.312580	0.095410
0.180283	-0.139210	0.055969	-0.256595	0.141051	0.211925	0.455659	0.017872	-0.058055	-0.609467	-0.467212	-0.178469
0.224070	-0.195183	-0.103833	0.173396	0.045081	0.169319	0.235371	-0.458103	0.110846	-0.038471	-0.323545	-0.216628
0.273097	-0.081734	-0.095581	0.127559	-0.008270	0.153923	0.028331	-0.444215	0.070785	0.363773	-0.063053	-0.193433
0.242783	0.059149	-0.026188	-0.145484	-0.072353	0.183282	-0.020103	0.095951	-0.127190	0.150894	0.217556	-0.058753
0.143980	-0.000592	-0.115836	-0.162666	-0.093458	0.242359	-0.064370	0.275036	-0.260548	-0.082015	0.487223	0.191593
0.038441	-0.108782	-0.361147	0.152387	-0.073121	0.290694	-0.232361	-0.024920	-0.199725	0.168319	0.530340	0.322955
-0.064444	0.056143	-0.478176	0.527483	-0.085016	0.284249	-0.354193	-0.134905	0.031859	0.369076	0.171792	0.235754
-0.197254	0.401126	-0.283128	0.649713	-0.125692	0.199036	-0.197931	-0.088734	0.300944	0.089909	-0.327703	0.096907
-0.313228	0.521006	0.039084	0.378896	-0.154855	0.047228	0.163835	-0.094365	0.426417	-0.145627	-0.514849	-0.050897
-0.284796	0.300788	0.190303	-0.045827	-0.183635	-0.122795	0.417430	0.091071	0.358767	0.015297	-0.340558	-0.334847
-0.085020	0.013307	0.117883	-0.167629	-0.190158	-0.247705	0.373903	0.303951	0.242743	0.216425	-0.146607	-0.613560
0.106555	-0.125310	-0.009684	0.079049	-0.105738	-0.287433	0.125227	0.096326	0.180007	0.154682	-0.077798	-0.494219
0.090088	-0.154236	-0.041192	0.273472	0.043930	-0.249495	-0.132853	-0.208103	0.082501	-0.089209	0.097662	0.056488
-0.105596	-0.161374	0.047339	0.176451	0.131838	-0.187218	-0.286088	-0.115761	-0.078455	-0.215677	0.485710	0.512326
-0.263471	-0.140712	0.156908	0.041998	0.090379	-0.164670	-0.306520	0.063293	-0.119634	-0.075578	0.765589	0.422131
-0.255241	-0.069713	0.164037	0.100439	-0.003282	-0.213704	-0.207011	0.046026	0.049243	0.119455	0.632458	0.003349
-0.163209	0.019318	0.085238	0.186765	-0.026689	-0.314634	-0.059073	0.098578	0.216666	0.106197	0.255378	-0.187073
-0.103352	0.071175	0.067602	0.056512	0.012068	-0.414133	0.030224	0.312213	0.192856	-0.019539	-0.010501	-0.012737
-0.056962	0.043366	0.150904	-0.256977	-0.040504	-0.459946	0.030981	0.377928	0.111980	0.060364	-0.112959	0.200200
0.051166	-0.053560	0.187302	-0.515854	-0.227764	-0.429523	0.025682	0.156761	0.153174	0.140667	-0.191219	0.296383
0.203861	-0.148601	0.076232	-0.542964	-0.343266	-0.339330	0.079050	0.040395	0.184920	-0.085423	-0.208989	0.437476
0.323247	-0.175273	-0.094456	-0.356633	-0.247334	-0.231957	0.134690	0.021626	-0.006298	-0.075957	-0.047552	0.578569
0.365537	-0.130194	-0.203608	-0.105010	-0.116098	-0.153217	0.105167	-0.097743	-0.309661	0.390288	0.199402	0.428119
0.309399	-0.041163	-0.245618	0.080959	-0.166751	-0.134606	0.010544	-0.096617	-0.430552	0.455819	0.340854	0.050500
0.147349	0.077563	-0.264748	0.148950	-0.364755	-0.179702	-0.046588	0.058413	-0.312683	-0.055510	0.364682	-0.092423
-0.038630	0.189927	-0.253120	0.104259	-0.546643	-0.266674	-0.022751	0.188668	-0.153257	-0.379630	0.347284	0.156039
-0.106344	0.232768	-0.185978	0.008774	-0.590772	-0.358657	0.024925	0.225844	-0.087144	-0.345173	0.258403	0.450949
-0.022544	0.179781	-0.099707	-0.046591	-0.461455	-0.411986	0.037415	-0.175821	-0.075433	-0.205074	0.103713	0.520560
0.088217	0.075684	-0.068949	-0.037809	-0.327917	-0.394806	0.031359	-0.465611	-0.052010	-0.004393	0.057571	0.461428
0.107304	0.013307	-0.111710	-0.015281	-0.442653	-0.305687	0.046121	-0.090986	-0.030099	0.148621	0.196754	0.399302
0.054534	0.065914	-0.155596	-0.014136	-0.678646	-0.183281	0.071102	0.285926	-0.037654	0.219834	0.304167	0.266443
0.007759	0.206087	-0.136841	-0.031318	-0.570435	-0.084140	0.069966	0.287428	-0.003276	0.416046	0.181247	0.004098
-0.013565	0.298157	-0.119962	-0.074082	-0.056620	-0.043339	0.046121	0.126356	0.172448	0.616425	-0.038100	-0.251795
-0.016932	0.246673	-0.215611	-0.137465	0.325696	-0.054434	0.027953	0.171026	0.411299	0.506197	-0.112202	-0.329984
0.021602	0.106876	-0.365273	-0.179084	0.227423	-0.087361	0.039308	0.444770	0.502758	0.314152	-0.064565	-0.281724
0.103187	-0.008105	-0.360772	-0.192448	-0.055085	-0.118858	0.108574	0.577327	0.402607	0.322864	-0.111068	-0.304170
0.148471	-0.065581	-0.156721	-0.240176	-0.136052	-0.145701	0.236507	0.302074	0.264663	0.264152	-0.281957	-0.392460
0.092708	-0.086993	0.013572	-0.310432	-0.061609	-0.177197	0.334539	-0.006902	0.167157	-0.040743	-0.315227	-0.325495
-0.001219	-0.076851	-0.034440	-0.251249	-0.055853	-0.218357	0.281170	0.094449	0.078722	-0.230822	-0.026758	-0.092049
-0.027407	-0.044920	-0.169849	-0.004590	-0.171739	-0.263095	0.085106	0.184539	0.033748	-0.003636	0.356361	0.023179
0.011875	-0.035153	-0.148469	0.217704	-0.355930	-0.299602	-0.091612	-0.116512	0.070785	0.317182	0.433895	-0.101402
0.025717	-0.054687	0.057470	0.178361	-0.528992	-0.318929	-0.119989	-0.376272	0.099130	0.347106	0.136240	-0.246557
-0.024040	-0.030269	0.245838	-0.045446	-0.532062	-0.315708	-0.049614	-0.135281	0.069652	0.178167	-0.256626	-0.228974
-0.084272	0.062532	0.216945	-0.164575	-0.282253	-0.280991	-0.004212	0.478191	0.091949	0.028549	-0.521276	-0.096538
-0.088013	0.079818	-0.018311	-0.046591	0.015139	-0.205114	0.008274	0.549539	0.195880	-0.080500	-0.647930	0.048628
-0.007579	-0.096009	-0.215611	0.157353	0.083853	-0.094878	0.090405	-0.174320	0.232539	-0.257706	-0.661541	0.118988
0.124145	-0.293229	-0.138341	0.194786	-0.071202	0.017153	0.268301	-0.578224	0.136923	-0.372814	-0.536021	0.025425
0.205732	-0.247024	0.153530	-0.028263	-0.241194	0.081958	0.409860	-0.005776	0.025058	-0.435669	-0.292164	-0.173979
0.139489	-0.007354	0.353906	-0.279123	-0.284940	0.071575	0.368604	0.539775	-0.042566	-0.571981	-0.019953	-0.245435
-0.044616	0.162118	0.278859	-0.181375	-0.152937	0.001758	0.160050	0.176281	-0.109056	-0.471640	0.219825	-0.049026
-0.197254	0.187297	0.049215	0.270416	0.143354	-0.070898	-0.046966	-0.538434	-0.131345	0.076273	0.432760	0.295260
-0.220823	0.171889	-0.113210	0.595092	0.435868	-0.087004	-0.104855	-0.615386	-0.022165	0.564152	0.603713	0.525799
-0.159842	0.128296	-0.125588	0.450707	0.465811	-0.027233	-0.023129	-0.020040	0.164134	0.502788	0.643804	0.456937
-0.088387	0.041487	-0.029189	0.062242	0.177903	0.070500	0.081700	0.330237	0.300944	0.191425	0.502730	0.169137
-0.006457	0.015185	0.115632	-0.199703	-0.165983	0.137454	0.130148	0.162017	0.359523	0.121728	0.294334	-0.049774
0.103187	0.085455	0.217696	-0.266140	-0.269974	0.129219	0.129013	-0.002398	0.349697	0.279303	0.192216	-0.097661
0.206855	0.089965	0.179047	-0.177557	-0.165600	0.060475	0.099111	0.007737	0.228382	0.242561	0.183139	-0.184080
0.257379	-0.073094	0.036457	0.058040	-0.130297	-0.006474	0.054069	0.073053	0.004280	-0.161152	0.109765	-0.348315
0.240537	-0.254537	-0.026564	0.238331	-0.208577	-0.012916	0.046499	0.094449	-0.191791	-0.470883	-0.014282	-0.254413
0.155956	-0.262050	0.069103	0.097765	-0.105354	0.059401	0.118036	0.045650	-0.247326	-0.116093	0.005756	0.182611
0.012997	-0.108030	0.162161	-0.219558	0.286156	0.176480	0.174433	0.018999	-0.181969	0.408849	0.122624	0.461054
-0.116445	0.035474	0.081861	-0.302796	0.619362	0.283533	0.064289	0.073428	-0.075811	0.126273	0.008403	0.257461
-0.119064	0.049754	-0.110960	-0.106919	0.598632	0.338671	-0.173338	0.115095	0.028080	-0.453087	-0.354924	-0.005629
0.021602	0.006545	-0.225363	0.006483	0.362932	0.335091	-0.313330	0.020125	0.111224	-0.305037	-0.519386	0.122730
0.150717	0.065162	-0.189354	-0.119138	0.154486	0.296064	-0.260738	-0.117638	0.127097	0.056955	-0.267212	0.397057
0.110672	0.217361	-0.078326	-0.202757	0.025504	0.253100	-0.173338	-0.101122	0.035638	-0.095646	0.083290	0.413898
-0.048731	0.267718	0.028577	0.000373	-0.000212	0.228037	-0.180148	-0.060956	-0.129457	-0.138055	0.299250	0.321832
-0.139266	0.155354	0.095744	0.302502	0.109573	0.228395	-0.185445	-0.160806	-0.282838	0.176273	0.526179	0.400425
-0.104474	0.092595	0.075482	0.336497	0.233565	0.255248	-0.077613	-0.271166	-0.377284	0.101273	0.756512	0.458060
-0.076041	0.201953	-0.052445	0.089362	0.235100	0.307880	0.057476	-0.232503	-0.399196	-0.192958	0.704319	0.238000
-0.126172	0.252310	-0.184853	-0.059955	0.178671	0.376265	0.091162	-0.203599	-0.314949	-0.091103	0.366951	-0.036681
-0.123928	0.037729	-0.191980	0.118010	0.152183	0.433909	0.055583	-0.036182	-0.137390	0.070591	0.081020	-0.075214
0.047049	-0.216220	-0.085828	0.381952	0.106886	0.441786	0.041957	0.308833	0.031103	0.073622	-0.053223	-0.065113
0.255882	-0.203447	0.052968	0.391883	0.048536	0.370178	0.034009	0.431251	0.138813	0.124000	-0.241881	-0.272371
0.267858	-0.062576	0.221823	0.200516	0.087308	0.225531	-0.003076	0.257012	0.251814	0.051652	-0.505019	-0.487859
0.075118	-0.111036	0.406814	0.120684	0.208229	0.056179	0.007896	-0.019665	0.370861	-0.195987	-0.612013	-0.382734
-0.088387	-0.251907	0.494994	0.222670	0.275792	-0.066603	0.130526	0.002482	0.361791	-0.255813	-0.491408	-0.105517
-0.083898	-0.153485	0.437208	0.258575	0.278479	-0.089867	0.247483	0.301698	0.165646	-0.124045	-0.338667	-0.041544
-0.037882	0.126793	0.324262	0.082486	0.316099	-0.007905	0.206227	0.244620	-0.086389	-0.004014	-0.294055	-0.213635
-0.088013	0.221494	0.228953	-0.121429	0.393642	0.132441	0.067317	-0.075971	-0.231081	0.147864	-0.272505	-0.343078
-0.136648	0.073054	0.161410	-0.140138	0.435101	0.263841	0.021140	-0.138284	-0.225414	0.195212	-0.169669	-0.302300
-0.028903	-0.023507	0.171917	-0.026736	0.422816	0.339387	0.081321	-0.071842	-0.127945	0.056955	-0.025624	-0.184080
0.161944	0.027582	0.280360	0.064916	0.377135	0.359437	0.075644	0.006236	-0.024432	0.116803	0.070052	-0.094294
0.224070	0.000535	0.379047	0.124503	0.298824	0.359079	-0.061722	0.077933	0.052267	0.389531	0.087828	-0.111877
0.104684	-0.175273	0.371542	0.209683	0.247385	0.374117	-0.179770	-0.071842	0.127475	0.169076	0.020884	-0.248054
-0.064818	-0.249653	0.282986	0.297918	0.346809	0.414217	-0.151014	-0.191587	0.183786	-0.453087	-0.101994	-0.356172
-0.171066	-0.083237	0.155407	0.320072	0.564851	0.461120	-0.040156	-0.002773	0.145615	-0.393261	-0.169669	-0.315019
-0.186778	0.099736	0.007945	0.245206	0.647001	0.481528	0.023411	0.198056	0.018258	0.348621	-0.128459	-0.247305
-0.105596	0.086207	-0.081327	0.131761	0.444314	0.442502	0.012815	0.119599	-0.097345	0.592940	-0.085737	-0.276486
0.044429	0.011429	-0.018311	0.110752	0.127999	0.334016	-0.008373	0.072677	-0.160435	0.202031	-0.124301	-0.236830
0.157079	0.111010	0.165538	0.182181	-0.055469	0.182924	0.006004	0.231101	-0.206903	-0.135025	-0.177609	0.024676
0.136495	0.314317	0.294243	0.128323	-0.055853	0.056179	0.040443	0.053909	-0.210303	-0.288755	-0.223356	0.299377
0.038067	0.343629	0.189928	-0.087446	0.046617	0.026462	0.057097	-0.274170	-0.112834	-0.295192	-0.317495	0.327446
0.023098	0.129424	-0.119962	-0.107301	0.176751	0.123848	0.074130	-0.321467	0.012969	-0.152064	-0.377231	0.190096
0.142483	-0.084364	-0.347269	0.196696	0.272720	0.301435	0.136961	-0.096242	0.005791	-0.229308	-0.264943	0.090545
0.240912	-0.065205	-0.243743	0.315489	0.311108	0.452527	0.192601	0.117347	-0.150235	-0.450058	-0.075908	0.023554
0.160822	0.142577	0.054469	-0.095083	0.313412	0.475441	0.099489	-0.096242	-0.274904	-0.305037	0.008403	-0.040422
-0.012068	0.319954	0.193305	-0.515854	0.273488	0.339029	-0.144961	-0.401422	-0.213703	0.156955	0.071187	0.049003
-0.041249	0.310183	0.064225	-0.339833	0.176751	0.099860	-0.316735	-0.456977	-0.025188	0.443319	0.292443	0.317715
0.127513	0.130175	-0.131590	0.181417	0.072337	-0.136037	-0.224416	-0.329725	0.101398	0.336122	0.527314	0.415021
0.283950	-0.061824	-0.207359	0.393793	0.028575	-0.277054	0.035901	-0.078974	0.094217	0.158091	0.462639	0.061727
0.240163	-0.106152	-0.138716	0.174541	0.050839	-0.296739	0.196764	0.244620	0.092705	0.054682	0.147586	-0.420893
0.079235	-0.026888	0.007195	-0.108447	0.068882	-0.236610	0.130526	0.524379	0.243877	-0.195608	-0.043393	-0.484866
0.025717	-0.002846	0.126138	-0.194739	-0.029759	-0.174334	-0.025778	0.445521	0.462320	-0.259978	0.025423	-0.150784
0.144355	-0.083612	0.155782	-0.103865	-0.258846	-0.176481	-0.048101	0.068924	0.511073	0.140288	0.117707	0.072955
0.269729	-0.104274	0.175294	0.022138	-0.413489	-0.261306	0.100625	-0.192713	0.306613	0.295970	0.105605	-0.018723
0.221825	0.021196	0.267602	0.034740	-0.314871	-0.386574	0.210769	0.034389	0.019391	-0.102841	0.137753	-0.175476
-0.001593	0.157984	0.329891	-0.057282	-0.120320	-0.477841	0.096083	0.303576	-0.108678	-0.097161	0.230415	-0.211391
-0.239902	0.197443	0.231204	-0.037045	-0.082330	-0.475694	-0.139285	0.068548	0.017880	0.789531	0.151747	-0.159015
-0.327819	0.185793	0.075106	0.203189	-0.121087	-0.373689	-0.238037	-0.163434	0.245389	1.248876	-0.167401	-0.049400
-0.224564	0.154226	0.032330	0.431608	-0.023236	-0.223367	-0.135123	0.197304	0.276379	0.174379	-0.476664	0.040021
-0.027781	0.074181	0.046213	0.433136	0.099208	-0.099888	0.004869	0.736170	0.020147	-1.158140	-0.547363	-0.022838
0.117783	0.002789	-0.011935	0.338025	-0.035515	-0.056581	0.060882	0.752318	-0.243170	-0.932829	-0.400671	-0.116366
0.143980	0.035098	-0.066699	0.275382	-0.395070	-0.097383	0.062775	0.223591	-0.262437	0.339152	-0.162108	0.060230
0.094953	0.137691	0.003819	0.125267	-0.647948	-0.175049	0.051420	-0.320716	-0.204636	0.744076	0.105983	0.467416
0.060148	0.195188	0.103249	-0.067973	-0.620703	-0.220504	0.023032	-0.658179	-0.342528	0.008102	0.400990	0.721907
0.080358	0.165125	0.076983	-0.017572	-0.474118	-0.182565	-0.001941	-0.455476	-0.540488	-0.695040	0.662715	0.661278
0.140986	0.074181	-0.029939	0.205481	-0.400442	-0.061234	-0.015562	-0.026797	-0.446419	-0.648846	0.712639	0.479018
0.219579	-0.034777	-0.079827	0.206245	-0.350557	0.090551	-0.072316	0.007362	-0.061077	0.204303	0.441459	0.350275
0.281705	-0.096760	-0.058446	0.009537	-0.188240	0.197962	-0.154798	-0.137908	0.252947	1.042162	0.016724	0.272057
0.260747	-0.064078	-0.043818	-0.036282	0.040475	0.213716	-0.101828	0.028383	0.256349	0.580440	-0.260785	0.179616
0.137244	0.037353	-0.066323	0.015646	0.195177	0.141034	0.147181	0.275412	0.066628	-0.755245	-0.256626	0.042266
0.008882	0.162494	-0.084328	-0.085919	0.262740	0.029684	0.386772	0.062918	-0.046344	-1.030641	-0.032051	-0.038551
-0.025536	0.301539	-0.032565	-0.221849	0.310341	-0.058013	0.416673	-0.395416	0.046220	0.018704	0.283365	0.115619
-0.009076	0.389852	0.088240	-0.237122	0.370225	-0.076624	0.317128	-0.396166	0.214021	0.878167	0.519371	0.410155
-0.025162	0.307928	0.156532	-0.275686	0.463507	-0.021148	0.256567	0.020500	0.245011	0.761500	0.547359	0.455814
-0.024414	0.088837	0.069853	-0.299741	0.536444	0.075155	0.203577	0.306955	0.167157	0.013403	0.435030	0.166143
0.079983	-0.052809	-0.052445	-0.067973	0.421281	0.158578	0.043093	0.164644	0.235185	-0.614768	0.365438	-0.044911
0.205732	-0.034401	-0.000307	0.181417	0.099208	0.186505	-0.166527	-0.048569	0.525434	-0.314881	0.378297	0.051622
0.187019	-0.018624	0.168540	-0.001536	-0.174042	0.156788	-0.241820	-0.078974	0.749546	0.738773	0.346905	0.138449
0.045178	-0.102020	0.159534	-0.281413	-0.223927	0.108452	-0.110908	-0.013659	0.615003	1.174187	0.216043	-0.045659
-0.033019	-0.160247	-0.104583	0.051929	-0.161762	0.092699	0.104789	0.214203	0.214776	0.436122	0.134349	-0.264140
-0.005334	-0.105401	-0.318386	0.729927	-0.127227	0.131009	0.200171	0.453031	-0.067877	-0.214919	0.247057	-0.203534
-0.042371	-0.017497	-0.206609	0.775000	-0.132599	0.194382	0.073751	0.206692	0.012213	0.133470	0.419523	0.078943
-0.199498	0.040735	0.125013	0.089362	-0.165983	0.225531	-0.150636	-0.299695	0.285449	0.591046	0.343502	0.281039
-0.254119	0.078315	0.362536	-0.431852	-0.196298	0.184715	-0.224794	-0.124019	0.342516	0.253167	-0.021087	0.203943
-0.043494	0.068544	0.324638	-0.331433	-0.130297	0.086254	-0.059452	0.472934	0.033748	-0.315639	-0.316739	-0.035932
0.229310	0.010302	0.065350	-0.027882	0.079630	-0.011842	0.141882	0.699745	-0.316838	-0.385688	-0.256626	-0.082696
0.255133	-0.006978	-0.213735	0.109606	0.366003	-0.051213	0.119550	0.356523	-0.334972	0.003937	-0.002184	0.242865
0.044429	0.030213	-0.302257	0.140928	0.610916	-0.017927	-0.112422	-0.074845	-0.069388	0.566046	0.121490	0.667266
-0.136648	0.015185	-0.164973	0.096619	0.693066	0.045796	-0.273602	-0.108254	0.145237	0.772485	0.073456	0.802745
-0.141511	-0.052057	0.030454	-0.055755	0.534909	0.071217	-0.165392	0.111716	0.128231	0.275516	0.033744	0.607760
-0.049854	-0.044168	0.149778	-0.164575	0.208613	0.014647	0.079050	0.059164	-0.030854	-0.431883	0.082155	0.304616
0.016738	0.048251	0.233831	-0.132883	-0.072737	-0.112057	0.174054	-0.264785	-0.144190	-0.561758	0.140779	0.059856
0.022350	0.079818	0.317883	-0.096610	-0.170588	-0.240905	0.048392	-0.190085	-0.099234	0.047864	0.132836	-0.060250
0.022350	0.079818	0.317883	-0.096610	-0.170588	-0.286002	0.048392	0.058413	-0.099234	0.459606	0.132836	-0.060250
0.054160	-0.242140	0.209816	-0.043536	-0.383942	-0.201535	-0.032588	0.037017	0.075321	-0.149414	0.090098	0.026548
0.176540	-0.397662	0.117508	0.024810	-0.557771	-0.013274	0.139232	-0.029425	-0.052010	-0.908975	0.212639	-0.002636
0.252139	-0.381885	0.069478	-0.035900	-0.372046	0.198320	0.188059	-0.057203	-0.150235	-0.617418	0.301520	-0.089430
0.117783	-0.224484	-0.048694	-0.091265	0.133373	0.351202	0.029845	-0.078599	-0.028588	0.311500	0.152881	-0.054264
-0.188649	-0.078353	-0.238867	0.054603	0.470417	0.411353	-0.132853	-0.107128	0.237074	0.608091	-0.170047	0.117116
-0.407504	0.024201	-0.318761	0.247880	0.408229	0.398105	-0.062857	-0.061332	0.431330	0.066803	-0.379121	0.200200
-0.357747	0.182787	-0.190855	0.209683	0.234717	0.357289	0.207741	0.018248	0.476681	-0.378494	-0.328838	0.052371
-0.167325	0.326342	-0.003308	-0.004972	0.200935	0.326140	0.422351	0.058413	0.444557	-0.263007	-0.123545	-0.163878
-0.085768	0.245921	0.020698	-0.125247	0.238555	0.310386	0.400019	0.024254	0.349319	-0.047558	0.098797	-0.209520
-0.149367	0.024953	-0.165723	-0.059573	0.266962	0.286039	0.196764	0.057662	0.128987	-0.027490	0.278827	-0.065487
-0.180419	-0.015994	-0.369774	0.087452	0.310341	0.220876	0.013950	0.160890	-0.150990	-0.036956	0.417254	0.128344
-0.084646	0.123787	-0.343893	0.173014	0.317250	0.099502	0.004869	0.041521	-0.269615	-0.029383	0.563244	0.273554
0.038441	0.109506	-0.076451	0.059186	0.173296	-0.067676	0.118793	-0.278674	-0.138146	-0.114579	0.703184	0.327446
0.095328	-0.111787	0.167789	-0.227576	-0.117250	-0.242337	0.150209	-0.376647	0.073809	-0.152064	0.668388	0.255964
0.117783	-0.194432	0.162911	-0.377252	-0.384326	-0.372616	0.009031	-0.026046	0.210619	0.134985	0.360521	0.094661
0.126391	0.014058	-0.028439	-0.166484	-0.431524	-0.410554	-0.148744	0.465799	0.302834	0.464152	-0.007098	-0.043789
0.050792	0.213603	-0.179602	0.145894	-0.270358	-0.338256	-0.161230	0.445521	0.366704	0.390288	-0.147741	-0.109632
-0.090258	0.121156	-0.166098	0.192876	-0.151018	-0.182923	-0.089720	0.045650	0.287339	0.059228	-0.094811	-0.156396
-0.110086	-0.145220	-0.035566	0.057276	-0.215868	-0.016137	-0.079505	0.050530	0.023925	-0.036578	-0.103885	-0.184080
0.075118	-0.292102	0.083737	0.053075	-0.301440	0.082316	-0.115449	0.134614	-0.281326	0.110743	-0.232807	-0.089804
0.244280	-0.220352	0.092367	0.195550	-0.235822	0.063340	-0.076478	-0.101122	-0.477397	0.099000	-0.281579	0.118988
0.154085	-0.045671	0.026326	0.225344	-0.077726	-0.059802	0.046121	-0.171317	-0.532177	-0.065355	-0.164376	0.224901
-0.082775	0.090341	0.028953	-0.031318	0.058517	-0.219788	0.121821	-0.102248	-0.475886	-0.040364	-0.076286	0.084931
-0.125798	0.117774	0.133643	-0.452471	0.111492	-0.334319	0.052177	-0.008779	-0.358395	0.069076	-0.169669	-0.136942
0.121151	0.034722	0.183174	-0.644147	0.036252	-0.348636	-0.122638	0.193174	-0.266215	-0.172132	-0.336777	-0.194181
0.377888	-0.081734	0.078859	-0.294777	-0.061993	-0.265243	-0.270576	0.107212	-0.258659	-0.507611	-0.437344	-0.067732
0.343831	-0.119676	-0.030314	0.337261	0.037788	-0.139974	-0.267927	-0.241512	-0.285482	-0.408028	-0.475529	0.100275
0.044055	-0.052433	0.041711	0.618392	0.263124	-0.050855	-0.107503	-0.451347	-0.270371	-0.179327	-0.454735	0.204691
-0.239154	0.018191	0.263099	0.345664	0.251991	-0.050139	0.056340	-0.446467	-0.218236	-0.190307	-0.326569	0.175500
-0.293026	-0.003222	0.449591	-0.055755	-0.064679	-0.133532	0.060882	-0.116137	-0.127190	-0.142220	-0.158327	-0.030321
-0.157224	-0.074221	0.471729	-0.214212	-0.320626	-0.237684	-0.041291	0.268653	0.066628	-0.043015	-0.089140	-0.329610
-0.016184	-0.074597	0.316007	-0.174121	-0.271125	-0.279559	-0.067397	0.083939	0.309259	-0.205453	-0.107287	-0.556695
0.016738	0.024577	0.063474	-0.034373	-0.084249	-0.208335	0.000329	-0.332353	0.390513	-0.407649	-0.079688	-0.632640
-0.009824	0.114016	-0.147344	0.192112	-0.011724	-0.037254	0.028710	-0.211857	0.256349	-0.168725	0.023910	-0.585502
0.010378	0.094099	-0.222362	0.288369	-0.083865	0.162874	0.016977	0.138368	0.119160	0.195970	0.104470	-0.464290
0.083726	0.011429	-0.215986	0.006865	-0.161379	0.302867	0.102139	0.265649	0.115381	0.092940	0.077995	-0.325120
0.109175	-0.004724	-0.258746	-0.404361	-0.140273	0.326498	0.259595	0.156761	0.125585	-0.055510	-0.050955	-0.230844
0.033950	0.078691	-0.383653	-0.462780	-0.053167	0.233766	0.277385	-0.054200	0.063605	0.073243	-0.204452	-0.201290
-0.061077	0.166628	-0.496181	-0.216885	0.021281	0.080884	0.080943	-0.204350	0.031103	-0.032791	-0.268724	-0.212887
-0.073423	0.177526	-0.518311	-0.103101	0.065427	-0.056581	-0.125286	-0.197218	0.082501	-0.283075	-0.213147	-0.266011
0.000651	0.124914	-0.464298	-0.168393	0.049688	-0.128521	-0.127178	0.042647	0.095351	-0.091103	-0.170804	-0.368143
0.099070	0.009551	-0.359272	-0.140902	-0.079644	-0.142480	0.024168	0.265273	-0.022165	0.381197	-0.266834	-0.435857
0.168307	-0.195558	-0.207734	-0.051173	-0.238892	-0.149280	0.097597	0.122602	-0.206147	0.391425	-0.384792	-0.329984
0.158576	-0.360848	-0.070449	-0.100810	-0.292614	-0.197240	-0.017076	-0.092863	-0.370862	-0.081258	-0.309556	-0.055386
0.029834	-0.269563	-0.013810	-0.178321	-0.330987	-0.289581	-0.180526	0.088443	-0.482309	-0.236123	-0.074773	0.176622
-0.160965	-0.013365	0.027076	-0.057282	-0.495607	-0.385143	-0.194526	0.280669	-0.483820	0.114531	0.047738	0.197580
-0.264968	0.040735	0.164412	0.181799	-0.589237	-0.426302	-0.038264	0.070800	-0.342528	0.305440	-0.084981	0.088299
-0.225312	-0.142966	0.335894	0.273854	-0.334057	-0.370110	0.135069	-0.067338	-0.167991	-0.001364	-0.312202	0.003724
-0.178174	-0.177151	0.350153	0.130615	0.100744	-0.212272	0.175190	-0.140536	-0.097345	-0.409543	-0.391219	-0.078955
-0.253744	0.052385	0.167789	-0.068355	0.329150	0.009634	0.041579	-0.183329	-0.088656	-0.542447	-0.284603	-0.243190
-0.353632	0.201201	-0.040442	-0.087064	0.318402	0.223741	-0.186202	-0.022293	-0.031610	-0.339115	-0.177609	-0.388719
-0.277687	0.123035	-0.123713	0.049255	0.286924	0.355857	-0.336788	0.018999	0.023169	-0.006665	-0.212013	-0.334847
-0.028529	0.060653	-0.131590	0.069117	0.286924	0.363017	-0.279278	-0.066587	-0.038788	0.116803	-0.303507	-0.119359
0.184399	0.089589	-0.212985	-0.094319	0.248536	0.257754	-0.090099	-0.028674	-0.163457	-0.053238	-0.309934	0.001479
0.233801	0.023826	-0.370149	-0.157320	0.163699	0.096279	0.018112	0.156761	-0.195947	-0.107006	-0.264943	-0.138065
0.207229	-0.116670	-0.385903	0.027101	0.014371	-0.058371	-0.012535	0.204439	-0.087900	0.103167	-0.287250	-0.435857
0.211720	-0.132824	-0.098582	0.178361	-0.230066	-0.170397	-0.007995	-0.096617	0.090060	0.087258	-0.370425	-0.656957
0.228187	-0.077602	0.316758	0.016410	-0.471816	-0.243410	0.145667	-0.298194	0.223469	-0.202424	-0.412770	-0.667432
0.221825	-0.163628	0.512255	-0.294014	-0.584633	-0.299960	0.284577	0.043773	0.203061	-0.194472	-0.350766	-0.512176
0.224070	-0.348451	0.393305	-0.358924	-0.550481	-0.352215	0.187302	0.134990	0.015613	-0.019539	-0.184792	-0.303048
0.199744	-0.385265	0.185425	-0.113792	-0.340964	-0.387648	-0.082910	-0.307202	-0.212947	-0.130860	0.014455	-0.055760
0.021228	-0.194807	0.094619	0.081341	0.056981	-0.369394	-0.228956	-0.417187	-0.339128	-0.252784	0.140779	0.272805
-0.274695	0.042990	0.095744	-0.004590	0.386732	-0.263453	-0.111665	-0.115010	-0.320616	0.042940	0.187677	0.572955
-0.418353	0.152347	0.083737	-0.113029	0.346425	-0.073761	0.076779	0.223966	-0.198591	0.419076	0.239114	0.559482
-0.273572	0.155729	0.037208	0.043143	0.119170	0.143182	0.110466	0.310335	-0.043699	0.368318	0.265968	0.131712
-0.065566	0.170386	-0.029189	0.253991	0.149496	0.305731	0.031359	-0.062082	0.074187	0.116803	0.147965	-0.342330
-0.062573	0.208341	-0.135341	0.133671	0.402471	0.359079	0.022275	-0.618389	0.124451	-0.030519	-0.050199	-0.389842
-0.202491	0.204959	-0.263998	-0.258886	0.442010	0.305373	0.103275	-0.713359	0.118405	-0.163045	-0.126569	-0.057631
-0.212966	0.162118	-0.325138	-0.499054	0.173296	0.195814	0.135069	-0.145040	0.070030	-0.340251	-0.093677	0.177371
0.000277	0.107252	-0.285753	-0.358924	-0.086551	0.098069	0.059368	0.505228	0.018258	-0.307309	-0.097458	0.140320
0.238666	0.027206	-0.242618	-0.029791	-0.179414	0.056895	-0.046209	0.383561	0.033748	0.114152	-0.026380	0.105140
0.279085	-0.052809	-0.286504	0.179507	-0.243497	0.066562	-0.128691	-0.223494	0.109712	0.445591	0.267480	0.138449
0.139115	-0.073845	-0.382528	0.194404	-0.360151	0.076229	-0.205498	-0.237758	0.140702	0.114909	0.472473	-0.042292
0.008134	-0.058819	-0.424163	0.143984	-0.455699	0.027536	-0.242199	0.066296	0.106689	-0.420523	0.204697	-0.338963
-0.025911	-0.056941	-0.336016	0.106551	-0.500596	-0.100246	-0.149501	0.028758	0.122184	-0.369406	-0.239613	-0.185577
-0.042746	-0.027264	-0.120337	0.105023	-0.537050	-0.267032	0.044985	0.024629	0.202683	0.195212	-0.257382	0.470784
-0.100359	0.066290	0.117133	0.223052	-0.518631	-0.396954	0.149452	0.051656	0.189455	0.523621	0.121868	0.891817
-0.152734	0.162118	0.225200	0.414419	-0.332522	-0.420218	0.037794	0.055410	0.015991	0.234985	0.400612	0.632087
-0.158720	0.210596	0.178671	0.388827	-0.048178	-0.315350	-0.162365	0.140620	-0.163079	-0.248997	0.460748	0.168015
-0.114949	0.195940	0.124638	0.033594	0.084621	-0.125300	-0.224794	0.064794	-0.198213	-0.208104	0.562110	0.083060
0.011875	0.065914	0.171917	-0.304705	0.022433	0.062624	-0.120367	-0.221242	-0.130968	0.347864	0.735332	0.316218
0.219953	-0.132824	0.230078	-0.287523	0.039707	0.166097	-0.026535	-0.173194	-0.087144	0.679303	0.769371	0.511203
0.358052	-0.163252	0.163662	-0.010699	0.265811	0.160368	-0.063992	0.317470	-0.110189	0.416425	0.644561	0.543389
0.256630	0.071175	0.034956	0.238713	0.455446	0.084822	-0.158203	0.499971	-0.129079	-0.244832	0.505378	0.454691
-0.006457	0.272227	0.041711	0.297536	0.425120	0.007128	-0.179770	0.279543	-0.038788	-0.740857	0.309841	0.288524
-0.131036	0.131678	0.240585	0.130615	0.316866	-0.026875	-0.093504	-0.050070	0.167157	-0.505718	-0.078554	0.156787
0.041810	-0.203447	0.465726	-0.152357	0.242778	-0.017927	0.048392	-0.010656	0.337603	0.261122	-0.462297	0.199077
0.306031	-0.355588	0.546026	-0.301650	0.100744	0.002474	0.163078	0.398206	0.293008	0.600894	-0.417684	0.357760
0.334474	-0.245896	0.483362	-0.197412	-0.083098	0.004621	0.180110	0.347511	0.032993	0.200516	0.046981	0.404542
0.096450	-0.085866	0.382048	0.012974	-0.070435	-0.010053	0.099111	-0.358254	-0.214458	-0.138055	0.411580	0.280290
-0.122057	0.021196	0.287865	0.128705	0.164083	-0.007548	0.002599	-0.887872	-0.205014	-0.060054	0.419901	0.223404
-0.110086	0.121908	0.164037	0.073701	0.321089	0.052957	-0.028805	-0.583103	0.032237	0.048243	0.388509	0.370859
0.033950	0.150844	-0.012310	-0.066446	0.251991	0.187579	0.014706	0.090695	0.199281	0.149758	0.504621	0.442715
0.114789	0.008799	-0.176226	-0.073701	0.184429	0.371252	0.107060	0.316719	0.101398	0.389909	0.466043	0.156413
0.100193	-0.138083	-0.218611	0.097001	0.294218	0.546333	0.213797	0.082812	-0.105278	0.395591	0.129432	-0.250672
0.060148	-0.039661	-0.122588	0.118392	0.398632	0.653744	0.264516	-0.017788	-0.150990	0.004695	-0.149253	-0.355798
0.005141	0.197443	-0.034440	-0.174121	0.309189	0.666992	0.198278	0.172152	0.026191	-0.241424	-0.148119	-0.201290
-0.069682	0.247800	-0.112460	-0.342124	0.177135	0.607915	0.077158	0.189794	0.296409	-0.096025	-0.126191	-0.132079
-0.102603	0.105748	-0.302633	-0.040100	0.217442	0.525209	0.041957	0.112092	0.507671	0.160743	-0.290274	-0.243938
-0.065192	0.073054	-0.406158	0.320072	0.318402	0.453243	0.094947	0.208570	0.561715	0.372106	-0.481957	-0.431742
-0.037882	0.232768	-0.366398	0.261631	0.230494	0.385932	0.067317	0.208570	0.484618	0.341046	-0.555303	-0.643863
-0.071552	0.328221	-0.299257	0.026719	-0.019782	0.284965	-0.110908	0.186041	0.410544	-0.141462	-0.554546	-0.742629
-0.073049	0.186545	-0.244118	0.040470	-0.167902	0.122058	-0.254306	0.324980	0.393915	-0.550020	-0.471371	-0.538364
0.032828	-0.034401	-0.119962	0.218468	-0.106121	-0.083067	-0.166906	0.261142	0.325132	-0.350095	-0.253223	-0.184829
0.120403	-0.094882	0.056345	0.282639	0.003625	-0.263095	0.070723	-0.009905	0.125207	0.018326	0.001219	-0.051271
0.008882	0.011053	0.171917	0.218850	0.008614	-0.345772	0.202442	0.028008	-0.126056	0.127031	0.178600	-0.121230
-0.235039	0.093723	0.224450	0.132143	-0.036283	-0.302465	0.107060	0.155260	-0.324394	0.343319	0.340098	-0.045659
-0.332308	0.049754	0.291617	0.090126	0.001707	-0.169681	-0.096909	-0.046692	-0.440752	0.581576	0.531474	0.233883
-0.157972	-0.033650	0.325013	0.159645	0.137596	-0.028306	-0.201714	-0.250146	-0.450575	0.191803	0.586315	0.423628
0.100567	-0.057316	0.216195	0.285695	0.249304	0.045438	-0.100693	-0.134905	-0.312305	-0.324726	0.337072	0.389197
0.224819	-0.046047	0.047714	0.262013	0.209381	0.016437	0.124092	-0.012533	-0.079589	-0.042257	-0.106909	0.296383
0.236421	-0.048301	0.050716	0.024047	0.030878	-0.093804	0.285712	-0.118389	0.071541	0.385364	-0.446418	0.270934
0.279459	-0.056941	0.276983	-0.234831	-0.127610	-0.222294	0.285334	0.012242	-0.002143	-0.086559	-0.512958	0.226398
0.364040	-0.067835	0.494244	-0.322269	-0.152169	-0.303897	0.202442	0.299069	-0.238259	-0.711701	-0.400671	0.051997
0.373397	-0.086993	0.483737	-0.207721	-0.103052	-0.304613	0.149452	0.113593	-0.404863	-0.466718	-0.284603	-0.175850
0.257004	-0.065581	0.316758	0.064916	-0.062760	-0.236610	0.112737	-0.059455	-0.348195	0.021734	-0.221465	-0.251795
0.076615	0.045996	0.222198	0.343373	0.012452	-0.144985	0.016598	0.119975	-0.138146	0.082712	-0.174962	-0.108510
-0.084272	0.185042	0.263850	0.341081	0.139899	-0.073045	-0.097288	0.085440	0.073431	0.166046	-0.128081	0.068838
-0.137022	0.225252	0.285613	-0.018336	0.194026	-0.032601	-0.085180	-0.238884	0.232539	0.306197	-0.098592	0.063224
-0.010946	0.137691	0.156532	-0.327996	0.103815	-0.005758	0.073373	-0.395416	0.339493	-0.057782	-0.094433	-0.108136
0.212094	0.023074	-0.044568	-0.166484	-0.019782	0.033623	0.196764	-0.112758	0.365570	-0.461038	-0.072127	-0.243190
0.283950	0.009551	-0.146969	0.246734	-0.069283	0.095921	0.115387	0.160140	0.319841	-0.132754	0.073078	-0.208772
0.074370	0.147086	-0.116586	0.365527	-0.049713	0.165739	-0.115827	-0.039560	0.259372	0.426273	0.390022	-0.066235
-0.221571	0.350017	-0.066699	0.173396	0.028575	0.217296	-0.291385	-0.261782	0.172070	0.370591	0.728524	0.024302
-0.298638	0.403757	-0.072700	0.115336	0.124928	0.234482	-0.280035	-0.110506	0.020525	-0.027112	0.830264	-0.019097
-0.092128	0.158736	-0.097081	0.259721	0.079630	0.214432	-0.112422	0.113218	-0.089789	-0.057403	0.593880	-0.104769
0.192259	-0.203072	-0.101207	0.228399	-0.173274	0.158220	0.099111	0.209321	-0.010076	0.176652	0.178222	-0.088308
0.328112	-0.301494	-0.089204	-0.034373	-0.382023	0.062266	0.243698	0.179284	0.173582	0.252409	-0.182902	-0.004133
0.255882	-0.079480	-0.054696	-0.143193	-0.275346	-0.068392	0.251268	0.131987	0.222713	0.288773	-0.405586	-0.057257
0.081106	0.086583	-0.005558	0.006865	-0.005201	-0.199029	0.138475	0.258889	0.096863	0.115667	-0.562486	-0.276112
-0.042371	-0.026888	0.007195	0.074083	0.037404	-0.275622	0.016977	0.552918	-0.025943	-0.456873	-0.666834	-0.362906
-0.064070	-0.154236	-0.020562	-0.055755	-0.196298	-0.253432	-0.008373	0.403087	-0.050121	-0.567437	-0.584036	-0.090553
-0.088013	-0.023507	-0.009309	-0.074464	-0.335976	-0.131026	0.038551	-0.253149	-0.047477	0.208849	-0.278932	0.327072
-0.219700	0.184666	0.065726	0.120302	-0.140273	0.046512	0.047635	-0.378899	-0.087900	0.658849	0.026558	0.517566
-0.370841	0.182787	0.112255	0.200134	0.177135	0.213358	-0.014806	0.175530	-0.174791	0.166425	0.147208	0.421009
-0.335301	0.045996	0.051091	0.016792	0.306502	0.319337	-0.076478	0.489456	-0.277171	-0.099811	0.205831	0.226024
-0.085020	0.000535	-0.077576	-0.146629	0.257749	0.350486	-0.084045	0.100080	-0.300216	0.233470	0.351822	0.043015
0.146226	0.009926	-0.164598	-0.110738	0.247001	0.325423	-0.067019	-0.499770	-0.171768	0.249000	0.434651	-0.101028
0.164564	-0.078353	-0.141717	-0.060719	0.359861	0.275656	-0.056047	-0.542188	-0.011965	-0.156608	0.271641	-0.105891
0.064639	-0.174897	-0.052820	-0.110738	0.478095	0.227321	-0.042047	-0.210731	0.001258	-0.306551	0.023910	0.108134
0.040687	-0.103898	-0.002182	-0.100047	0.447001	0.187937	-0.037885	-0.053449	-0.073544	-0.103219	-0.018441	0.394437
0.085971	0.020069	-0.014185	0.035504	0.235484	0.147120	-0.088585	-0.175821	-0.039543	0.179303	0.117707	0.439347
0.063516	-0.046798	-0.002933	0.108079	-0.002898	0.090193	-0.164635	-0.175821	0.093839	0.131197	0.159311	0.114122
-0.019551	-0.222230	0.098746	0.024047	-0.096912	0.011424	-0.142691	0.134614	0.160355	-0.336085	-0.010501	-0.282098
-0.028529	-0.216220	0.264975	-0.050027	-0.090005	-0.072329	0.030981	0.290057	0.147883	-0.582204	-0.228270	-0.306789
0.040687	-0.047549	0.406439	0.002664	-0.140657	-0.119216	0.225909	0.274285	0.162622	-0.204696	-0.262675	0.054242
0.044804	0.003916	0.410566	0.063006	-0.223159	-0.080561	0.269437	-0.012533	0.177362	0.039909	-0.059272	0.353643
-0.069682	-0.091126	0.219947	0.055748	-0.153704	0.070142	0.172162	-0.222368	0.090816	-0.273231	0.206210	0.311353
-0.189771	-0.104274	-0.058822	0.127559	0.103815	0.305731	0.099111	0.026881	-0.024054	-0.384552	0.326860	0.151922
-0.210347	-0.025010	-0.221612	0.317781	0.374064	0.544185	0.120307	0.156386	0.016747	0.025520	0.310219	0.147431
-0.147123	-0.058443	-0.175851	0.341463	0.486156	0.685610	0.116144	0.033263	0.221957	0.474758	0.315136	0.191218
-0.061451	-0.171516	-0.004058	0.026338	0.462356	0.670572	-0.011022	-0.128899	0.398072	0.516803	0.380945	0.079317
-0.005334	-0.114792	0.141898	-0.338687	0.466579	0.521986	-0.146474	-0.113884	0.388624	0.142561	0.400990	-0.099157
-0.025536	0.103869	0.156532	-0.428034	0.552951	0.330794	-0.117719	0.020875	0.228760	-0.122909	0.329886	-0.133201
-0.103726	0.201953	0.040960	-0.326851	0.570993	0.197962	0.034009	-0.053073	0.072675	-0.001364	0.230794	-0.023213
-0.115323	0.066290	-0.107584	-0.246285	0.450840	0.170751	0.107438	-0.231752	0.031859	0.245591	0.168010	0.087176
0.008508	-0.114416	-0.203608	-0.154266	0.385964	0.219444	0.042714	-0.234380	0.051133	0.422485	0.191837	0.145934
0.129759	-0.168511	-0.239617	0.000373	0.480782	0.265989	-0.031832	-0.047818	-0.032743	0.369455	0.315514	0.175500
0.071001	-0.133199	-0.210359	0.066826	0.493834	0.235914	-0.029940	0.121852	-0.261682	0.092561	0.400612	0.178868
-0.103352	-0.113665	-0.084328	-0.016809	0.228191	0.103082	-0.004212	0.150380	-0.454353	-0.042257	0.250082	0.177745
-0.162835	-0.107279	0.103249	-0.070264	-0.118401	-0.091656	-0.007995	0.038893	-0.429419	-0.002500	-0.089518	0.219661
-0.041623	-0.036280	0.218071	-0.027118	-0.290312	-0.257727	-0.025400	-0.011407	-0.239770	-0.015752	-0.337911	0.289272
0.084100	0.076060	0.152405	-0.045827	-0.317173	-0.308908	-0.037507	0.128608	-0.067500	-0.037335	-0.374584	0.280290
0.064265	0.089213	-0.043818	-0.124483	-0.290696	-0.220504	-0.045074	0.441390	0.022791	0.019840	-0.385170	0.095036
-0.038630	-0.012613	-0.199482	-0.063391	-0.177879	-0.047276	-0.040912	0.416982	0.102532	-0.032413	-0.522410	-0.223362
-0.085020	-0.032523	-0.217111	0.091654	-0.037434	0.109527	-0.034480	-0.143539	0.204572	-0.177433	-0.662675	-0.462794
-0.056962	0.113264	-0.175851	0.108461	-0.038201	0.159294	-0.067776	-0.424695	0.257482	-0.177055	-0.630161	-0.438850
-0.020299	0.198946	-0.169474	0.090126	-0.152169	0.068352	-0.163122	-0.108254	0.200415	-0.110035	-0.439235	-0.248802
0.012623	0.059901	-0.155221	0.270798	-0.176344	-0.129953	-0.271711	0.139119	0.088170	-0.058160	-0.185548	-0.165375
0.054160	-0.094507	-0.079452	0.362853	-0.099598	-0.354720	-0.298952	0.015620	0.028458	-0.113821	0.107496	-0.264140
0.040687	-0.034777	-0.004058	-0.040482	-0.113796	-0.520075	-0.197552	-0.273794	0.039795	-0.229308	0.378297	-0.352431
-0.064444	0.082073	0.020698	-0.531891	-0.277649	-0.576982	-0.034102	-0.396166	0.039795	-0.347066	0.482307	-0.258155
-0.133655	-0.003973	0.046213	-0.339833	-0.414640	-0.538686	0.062018	-0.013659	-0.039921	-0.428853	0.411959	0.010083
-0.040127	-0.174146	0.090116	0.387299	-0.376651	-0.467820	0.051798	0.381683	-0.182346	-0.303901	0.345771	0.328943
0.087843	-0.098639	0.100622	0.719996	-0.250020	-0.430597	0.034387	0.115846	-0.325150	-0.037714	0.357496	0.533658
0.019731	0.203080	0.091617	0.297918	-0.230834	-0.452072	0.108195	-0.453224	-0.401840	0.143697	0.311353	0.524676
-0.189023	0.329348	0.114506	-0.285232	-0.358232	-0.503611	0.237642	-0.458103	-0.335728	0.089909	0.121490	0.383209
-0.211096	0.099736	0.123512	-0.398634	-0.474886	-0.524369	0.314857	0.107963	-0.078833	-0.199395	-0.129216	0.264197
0.090088	-0.144093	0.066476	-0.083246	-0.450711	-0.462093	0.311072	0.284800	0.275245	-0.354260	-0.334509	0.165395
0.423920	-0.059570	0.016947	0.159263	-0.332906	-0.308550	0.283820	-0.174320	0.476681	-0.142598	-0.420331	-0.037429
0.441510	0.150468	0.033080	0.015265	-0.253090	-0.109910	0.241427	-0.368389	0.333824	0.054682	-0.328459	-0.322502
0.203486	0.093347	0.037958	-0.270340	-0.259230	0.056179	0.107060	0.082437	-0.044077	-0.164181	-0.097458	-0.459801
0.068382	-0.142215	-0.030314	-0.277595	-0.248102	0.123848	-0.119232	0.435382	-0.310794	-0.398940	0.155907	-0.288457
0.161570	-0.151607	-0.130465	-0.043155	-0.108424	0.081600	-0.267927	0.231852	-0.242037	-0.065355	0.353713	0.029916
0.229310	0.111761	-0.238492	0.088216	0.058517	-0.025801	-0.200579	-0.132278	0.042063	0.593318	0.436164	0.164272
0.076615	0.307928	-0.333390	0.092036	0.038939	-0.134963	-0.026913	-0.192713	0.240098	0.764909	0.347284	0.020934
-0.114201	0.262080	-0.280877	0.149331	-0.134134	-0.206903	0.036658	0.168398	0.190589	0.345591	0.180113	-0.180713
-0.072674	0.108755	-0.017561	0.110370	-0.220473	-0.238399	-0.045453	0.241240	0.002769	0.058091	0.101822	-0.270500
0.151091	-0.026888	0.226326	-0.215740	-0.180181	-0.243410	-0.137772	-0.135656	-0.110945	0.134606	0.052276	-0.288457
0.274220	-0.146347	0.200060	-0.502108	-0.182867	-0.233031	-0.161608	-0.311707	-0.095834	0.183091	-0.142448	-0.245809
0.168307	-0.209833	0.012821	-0.346706	-0.248485	-0.206903	-0.147609	-0.176947	-0.098856	0.103167	-0.379121	-0.071473
-0.033019	-0.125686	-0.063323	0.030538	-0.226229	-0.162165	-0.113935	0.158263	-0.232592	0.091803	-0.408233	0.133209
-0.168821	0.070423	-0.017186	0.145130	-0.079260	-0.095235	-0.053398	0.494338	-0.411663	0.182712	-0.285737	0.144063
-0.219700	0.192934	-0.024313	-0.030173	0.069266	-0.007190	-0.007995	0.316719	-0.487220	0.404303	-0.299348	-0.033688
-0.225312	0.134685	-0.130465	-0.164193	0.120705	0.091983	-0.018967	-0.096242	-0.426774	0.530440	-0.510312	-0.165375
-0.187153	0.032468	-0.249744	-0.054228	0.097672	0.178986	-0.036750	0.008113	-0.267348	0.158849	-0.696701	-0.157893
-0.118316	0.074933	-0.324013	0.236803	0.083085	0.220518	-0.000050	0.306204	-0.029343	-0.537903	-0.682335	-0.157519
-0.083898	0.201201	-0.309009	0.426260	0.093834	0.187937	0.046121	0.170275	0.216288	-0.867702	-0.523923	-0.269004
-0.086891	0.188800	-0.176976	0.202807	0.053910	0.078019	0.020761	-0.271166	0.327399	-0.571981	-0.372694	-0.395079
-0.006083	-0.008105	-0.013435	-0.312723	-0.076574	-0.079487	-0.067776	-0.534305	0.252569	-0.110792	-0.265699	-0.399569
0.214714	-0.223357	0.044337	-0.550600	-0.246950	-0.231957	-0.154041	-0.324845	0.121806	0.083849	-0.128459	-0.305667
0.387618	-0.310885	-0.007059	-0.232540	-0.406966	-0.331814	-0.188850	0.112467	0.082123	0.100137	0.020884	-0.249550
0.285822	-0.219976	-0.041192	0.245970	-0.490235	-0.359731	-0.127556	0.270155	0.131254	0.125137	0.033365	-0.291450
-0.019925	0.017815	0.021824	0.411363	-0.399675	-0.329666	0.039308	0.078308	0.191345	0.120970	-0.130350	-0.346819
-0.235413	0.214354	0.129516	0.253609	-0.193612	-0.271327	0.210390	-0.054575	0.230271	-0.013480	-0.281579	-0.299307
-0.223441	0.141073	0.174919	0.001901	-0.101133	-0.210125	0.255053	0.010365	0.220823	-0.310338	-0.221843	-0.160885
-0.111582	-0.119676	0.119759	-0.177557	-0.176728	-0.155006	0.201306	0.185665	0.132388	-0.603787	0.034122	-0.079329
-0.052847	-0.206077	0.039084	-0.173739	-0.190158	-0.103468	0.193736	0.162767	0.043197	-0.637865	0.298872	-0.112251
-0.065192	0.006170	0.021073	-0.002299	-0.011340	-0.051928	0.260352	-0.153674	0.070408	-0.359940	0.427465	-0.050523
-0.094747	0.199322	0.037208	0.118010	0.213987	-0.002537	0.275492	-0.375146	0.138435	0.065667	0.465287	0.267940
-0.084272	0.086583	-0.002182	0.016410	0.327231	0.036487	0.154372	-0.275671	0.069652	0.413394	0.523910	0.539646
0.023472	-0.189172	-0.082077	-0.191685	0.317634	0.054747	-0.042804	0.077557	-0.094700	0.445591	0.528827	0.379841
0.214714	-0.321779	-0.100832	-0.291341	0.220513	0.040425	-0.194147	0.390320	-0.144190	0.150894	0.310219	0.029542
0.337468	-0.248526	-0.040817	-0.243231	0.079246	-0.015779	-0.207390	0.263771	-0.038788	-0.042257	-0.041503	0.025051
0.225193	-0.097887	0.014322	-0.166102	-0.046260	-0.107762	-0.062100	-0.175070	0.080234	0.088016	-0.228649	0.269063
-0.062573	0.037729	0.024825	-0.156175	-0.136436	-0.210482	0.154372	-0.197593	0.121806	0.144455	-0.180633	0.219661
-0.241399	0.084704	0.036457	-0.182139	-0.204740	-0.285286	0.280413	0.186416	0.069652	-0.145249	-0.067212	-0.114870
-0.142259	-0.029893	0.073606	-0.134029	-0.248869	-0.293160	0.219474	0.174404	-0.093189	-0.299357	0.092745	-0.169490
0.049669	-0.208706	0.098746	0.006483	-0.279184	-0.210125	0.023411	-0.348119	-0.305127	0.047106	0.411580	0.254093
0.027214	-0.211712	0.073981	0.097765	-0.321778	-0.037970	-0.189607	-0.591737	-0.431308	0.482334	0.751217	0.721533
-0.229427	0.016688	-0.019437	0.077139	-0.338278	0.188295	-0.339437	-0.232878	-0.430174	0.580819	0.793577	0.802371
-0.431073	0.251934	-0.190855	0.112662	-0.255392	0.405982	-0.375381	0.162392	-0.380306	0.344455	0.480415	0.552745
-0.362611	0.281622	-0.381777	0.274618	-0.055469	0.550987	-0.265278	0.073803	-0.330817	0.176273	0.045090	0.320335
-0.134403	0.110634	-0.462047	0.274618	0.212068	0.588581	-0.072694	-0.166061	-0.250348	0.377788	-0.333753	0.238000
0.009630	-0.121178	-0.391530	-0.080192	0.438939	0.533443	0.050284	-0.027548	-0.101878	0.466425	-0.629783	0.079317
0.011501	-0.253785	-0.285003	-0.411998	0.497673	0.432477	0.027574	0.284049	0.099508	-0.001364	-0.785170	-0.276112
-0.006457	-0.197812	-0.228739	-0.249340	0.391722	0.328288	-0.059073	0.188668	0.272977	-0.502689	-0.707665	-0.541731
0.014868	-0.031772	-0.160472	0.178361	0.275024	0.229827	-0.119611	-0.302323	0.315684	-0.433018	-0.447174	-0.498708
0.018983	0.062532	-0.038567	0.174159	0.230494	0.116687	-0.179013	-0.536181	0.210241	-0.042257	-0.181011	-0.371136
0.008134	0.015561	0.032705	-0.410852	0.169074	-0.029022	-0.275116	-0.229125	0.061715	0.070591	0.013320	-0.350934
0.075867	-0.089999	-0.035566	-0.889279	0.044697	-0.192587	-0.352301	0.195802	-0.010454	-0.131239	0.192972	-0.264140
0.206855	-0.156866	-0.151845	-0.636511	-0.047411	-0.326445	-0.342463	0.381683	0.032615	-0.353125	0.322322	-0.046782
0.216211	-0.133199	-0.151095	0.077139	-0.055853	-0.376195	-0.258468	0.320098	0.168669	-0.470883	0.247057	0.057985
-0.004586	-0.020126	0.025951	0.488904	-0.049330	-0.320361	-0.136259	0.155635	0.352343	-0.388717	-0.012013	0.005594
-0.277313	0.085455	0.287865	0.356742	-0.056620	-0.186145	0.036280	0.112843	0.476303	-0.272852	-0.187439	0.003724
-0.322207	0.053888	0.459722	0.094710	-0.027841	-0.034391	0.244834	0.104209	0.400340	-0.295571	-0.128459	0.027670
-0.120935	-0.103898	0.410191	0.008774	0.008614	0.077661	0.388286	-0.032428	0.118027	-0.298978	0.032987	-0.066984
0.063891	-0.243267	0.195182	-0.000008	-0.028224	0.129935	0.382987	-0.255401	-0.156279	-0.283075	0.163093	-0.105517
0.060896	-0.257918	0.025200	0.011828	-0.086168	0.139602	0.273600	-0.282803	-0.208791	-0.291405	0.258782	0.097655
-0.005709	-0.154987	0.026326	0.161554	-0.049330	0.137096	0.174433	-0.052698	-0.084500	-0.159259	0.267859	0.303868
0.017861	-0.017121	0.111129	0.351012	0.023200	0.134589	0.132798	0.146626	0.000124	0.050137	0.131701	0.268688
0.057154	0.037729	0.147902	0.300210	0.005160	0.118478	0.117279	0.216080	-0.057299	0.099379	0.017102	0.167640
-0.007579	-0.041915	0.144900	0.017556	-0.003282	0.070142	0.094569	0.138743	-0.176680	-0.053238	0.130945	0.184108
-0.099610	-0.136956	0.162161	-0.193212	0.176751	-0.003611	0.069588	-0.063209	-0.240526	-0.119122	0.351444	0.206188
-0.096618	-0.085866	0.153530	-0.168393	0.402855	-0.059444	0.070723	-0.144665	-0.202747	0.075894	0.425952	0.217790
-0.062573	0.088086	0.054469	0.001901	0.347577	-0.045486	0.116522	-0.096617	-0.121523	0.483470	0.416119	0.380215
-0.108215	0.224125	-0.052445	0.197460	0.066195	0.055463	0.178218	-0.119515	-0.118123	0.797864	0.505756	0.537027
-0.171440	0.243666	-0.044193	0.317017	-0.009422	0.205123	0.182003	-0.111257	-0.248837	0.746349	0.549629	0.319212
-0.125798	0.189176	0.007945	0.260103	0.250072	0.338313	0.077158	-0.008028	-0.397307	0.476273	0.297359	-0.138813
0.001774	0.106500	-0.069699	0.100057	0.431646	0.402044	-0.095396	0.118473	-0.386729	0.214909	-0.110690	-0.301551
0.085971	0.024201	-0.224613	0.044289	0.211300	0.384142	-0.219497	0.137617	-0.194436	-0.052481	-0.377609	-0.132453
0.094579	0.002037	-0.189729	0.052693	-0.179798	0.311460	-0.213822	0.181536	0.022791	-0.251269	-0.557193	-0.167245
0.097573	0.071551	0.095744	-0.122956	-0.362069	0.226247	-0.122638	0.281796	0.137301	-0.181220	-0.822599	-0.576897
0.136495	0.149717	0.313756	-0.385652	-0.292998	0.162158	-0.073073	0.128984	0.182653	-0.050209	-0.993488	-0.869453
0.187019	0.127545	0.163287	-0.320360	-0.110726	0.129935	-0.138529	-0.098119	0.234051	-0.063461	-0.833185	-0.715693
0.216959	0.027958	-0.238492	0.066826	0.144122	0.119552	-0.266792	-0.118389	0.257482	-0.102083	-0.562108	-0.440347
0.204983	-0.029142	-0.514936	0.268506	0.412836	0.105588	-0.348139	-0.081977	0.173960	-0.239910	-0.545851	-0.405929
0.143980	-0.008481	-0.472175	0.088980	0.526847	0.058327	-0.322411	-0.044815	-0.007809	-0.360697	-0.694811	-0.438102
0.079235	0.006170	-0.206609	-0.140520	0.432413	-0.042623	-0.216092	0.015996	-0.188769	-0.171754	-0.637344	-0.244687
0.082977	-0.031772	0.101373	-0.243995	0.271185	-0.191513	-0.087829	0.113593	-0.274904	0.053925	-0.328838	0.006342
0.139864	-0.068211	0.316758	-0.345178	0.117634	-0.354720	0.030224	0.046401	-0.248459	0.005073	-0.060407	-0.022090
0.142858	-0.068211	0.366664	-0.328378	-0.093458	-0.483568	0.127120	-0.149170	-0.161190	-0.135404	0.050763	-0.236082
0.042184	-0.062951	0.300622	0.039324	-0.310266	-0.536180	0.178218	-0.056827	-0.064099	-0.042636	0.159689	-0.297810
-0.092876	-0.065581	0.270228	0.491959	-0.345953	-0.496810	0.170648	0.200309	0.027325	0.241803	0.287904	-0.197923
-0.180793	-0.074597	0.338146	0.516024	-0.226229	-0.377626	0.143774	0.309959	0.072675	0.343697	0.242896	-0.144425
-0.199124	-0.122305	0.398559	0.154679	-0.219706	-0.215851	0.146802	0.175530	0.012969	0.183849	0.011807	-0.109258
-0.162087	-0.188421	0.329516	-0.069882	-0.389698	-0.062666	0.172540	-0.139034	-0.096967	-0.060054	-0.168157	0.017192
-0.111582	-0.153109	0.140022	0.071027	-0.452630	0.039709	0.181246	-0.329725	-0.095834	-0.267929	-0.203696	0.093164
-0.108963	0.021572	-0.041942	0.326566	-0.241578	0.078377	0.170648	-0.193088	0.071919	-0.304658	-0.216172	-0.002262
-0.164332	0.186545	-0.090705	0.397231	0.031646	0.079093	0.155508	0.051281	0.266931	-0.203560	-0.235076	-0.110755
-0.197628	0.211724	-0.017936	0.216940	0.129918	0.085180	0.124471	0.132362	0.316061	-0.014238	-0.189329	-0.143302
-0.133281	0.144080	0.015822	-0.034373	0.095369	0.125638	0.064667	0.098203	0.187188	0.098622	-0.108044	-0.235708
-0.011694	0.087710	-0.092205	-0.083246	0.076559	0.191517	0.008274	-0.011407	-0.009320	-0.061190	-0.038100	-0.346071
0.049669	0.079442	-0.233240	0.085160	0.129150	0.243075	-0.000050	0.074554	-0.130968	-0.187657	0.064757	-0.211765
0.014119	0.109882	-0.259872	0.134435	0.239707	0.239494	0.032873	0.150755	-0.122656	0.130061	0.200536	0.139946
-0.015435	0.132054	-0.217111	-0.090883	0.301511	0.168245	0.076779	-0.010281	-0.033121	0.415288	0.264833	0.353643
0.069130	0.096353	-0.226864	-0.230631	0.131838	0.054031	0.133176	-0.014410	0.062093	0.159606	0.206210	0.280664
0.226690	0.052761	-0.233990	-0.014518	-0.238508	-0.059802	0.195629	0.065545	0.130498	-0.141084	0.086694	0.129841
0.297424	0.068168	-0.088079	0.189820	-0.470665	-0.129953	0.187302	-0.049320	0.162244	0.017947	-0.000293	0.065844
0.210597	0.066665	0.140397	-0.025209	-0.381256	-0.134963	0.048392	-0.199845	0.155064	0.224758	0.000085	0.029542
0.098322	-0.026888	0.180547	-0.334487	-0.219322	-0.077698	-0.127556	-0.091362	0.130498	0.009238	0.082533	-0.020594
0.121525	-0.077978	-0.038567	-0.174502	-0.206275	0.012498	-0.177500	0.116596	0.113114	-0.186521	0.221716	0.010083
0.211346	0.037729	-0.235491	0.303266	-0.185937	0.092699	-0.093882	0.059915	0.081367	0.055061	0.382080	0.132087
0.155582	0.171513	-0.152220	0.445741	-0.005584	0.125638	-0.040534	-0.176572	0.003902	0.349000	0.449780	0.200200
-0.032645	0.145959	0.114506	0.075229	0.186732	0.100576	-0.114314	-0.220491	-0.086011	0.237637	0.338585	0.197206
-0.079408	0.056519	0.288240	-0.340978	0.235868	0.042215	-0.201336	-0.086482	-0.125679	-0.004014	0.195620	0.304242
0.095328	0.069672	0.249215	-0.397870	0.210148	-0.000747	-0.130962	0.085815	-0.111323	0.244834	0.202806	0.494362
0.189639	0.139194	0.094619	-0.150829	0.240475	0.012140	0.079807	0.309959	-0.071655	0.603925	0.205453	0.449826
-0.003838	0.131303	0.007945	0.111516	0.374064	0.080884	0.219474	0.291184	-0.000254	0.270591	-0.028649	0.150799
-0.228305	0.064035	0.089741	0.170340	0.539131	0.164306	0.139611	0.171401	0.105177	-0.445514	-0.263431	0.045260
-0.157598	0.046372	0.221448	0.035886	0.550264	0.207629	-0.067397	0.198807	0.181519	-0.640516	-0.088762	0.319212
0.092708	0.068920	0.199684	-0.041627	0.340283	0.180418	-0.199823	-0.071467	0.156575	-0.070656	0.347662	0.554616
0.178037	0.018942	0.063849	0.117628	0.134141	0.095563	-0.180148	-0.580100	0.022791	0.597485	0.518237	0.453568
0.063516	-0.104649	0.044337	0.304412	0.107269	0.002116	-0.081775	-0.610881	-0.167235	0.515288	0.340476	0.311727
0.008508	-0.170389	0.172668	0.203953	0.078095	-0.045128	-0.009509	-0.265536	-0.314949	-0.248619	0.216421	0.414272
0.118157	-0.151231	0.256345	-0.061482	-0.148716	-0.013990	-0.031453	-0.063959	-0.273015	-0.637108	0.314379	0.529916
0.216585	-0.165506	0.236833	-0.092410	-0.406966	0.091625	-0.141177	0.007737	0.036394	-0.237259	0.392291	0.394063
0.149968	-0.212087	0.217320	0.144366	-0.412338	0.240210	-0.223281	-0.110881	0.446825	0.135743	0.318161	0.177371
-0.021421	-0.135453	0.188052	0.318927	-0.163681	0.390228	-0.143826	-0.095116	0.608578	-0.031277	0.252352	0.115619
-0.156850	0.077563	0.052968	0.317399	0.094985	0.502294	0.058611	0.350140	0.372373	-0.318289	0.312110	0.127970
-0.213340	0.261329	-0.134215	0.297154	0.206694	0.550271	0.191087	0.399708	0.016369	-0.260357	0.435408	0.115619
-0.234291	0.331603	-0.220862	0.265451	0.280398	0.525925	0.160807	-0.090986	-0.073922	0.125516	0.539795	0.211428
-0.241773	0.304546	-0.164973	0.105405	0.498056	0.442144	0.084349	-0.206602	0.121050	0.494834	0.553033	0.455814
-0.183785	0.177526	-0.042317	-0.108828	0.775216	0.325423	0.095326	0.168773	0.314172	0.567561	0.409311	0.578194
-0.015061	0.036977	0.053343	-0.222994	0.820513	0.207629	0.171026	0.499971	0.361035	0.321349	0.168766	0.340545
0.179160	0.047124	0.054469	-0.229485	0.574832	0.117403	0.207741	0.363283	0.371239	-0.123666	-0.027136	-0.142554
0.225941	0.143704	-0.027689	-0.143193	0.295369	0.070142	0.155129	-0.224245	0.410166	-0.387581	-0.131862	-0.521155
0.090462	0.073805	-0.089204	0.062624	0.175216	0.056537	0.036280	-0.551572	0.375396	-0.151686	-0.136021	-0.532378
-0.027033	-0.151231	-0.037816	0.269270	0.178287	0.046154	-0.087072	-0.027548	0.185676	0.323622	0.005378	-0.248054
0.057154	-0.263552	0.122761	0.291807	0.168306	0.008560	-0.154420	0.637785	-0.102256	0.472106	0.206966	-0.008996
0.226316	-0.205325	0.324262	0.166520	-0.002898	-0.056939	-0.145339	0.495089	-0.358773	0.299379	0.280340	0.036652
0.203112	-0.139586	0.469853	0.080959	-0.339046	-0.115279	-0.083667	-0.138659	-0.455108	0.290288	0.227390	0.121607
-0.042746	-0.069713	0.465350	0.128705	-0.549713	-0.121721	-0.008752	-0.410806	-0.360284	0.313773	0.135484	0.345036
-0.224564	0.089589	0.323887	0.262013	-0.388163	-0.051928	0.039308	-0.069590	-0.198213	-0.007043	-0.110312	0.398928
-0.129165	0.198195	0.176045	0.329622	-0.078109	0.079093	0.054826	0.237860	-0.105656	-0.277396	-0.525813	0.150425
0.106181	0.083952	0.099872	0.210447	0.041243	0.224457	0.088513	0.211950	-0.072789	-0.104734	-0.738667	-0.055386
0.206855	-0.086993	0.054844	0.037414	0.078862	0.335448	0.151723	0.115095	-0.038410	0.073622	-0.538667	-0.022464
0.109549	-0.043793	0.023324	0.035122	0.320321	0.385574	0.132041	0.051281	-0.038032	-0.077850	-0.279688	0.019437
-0.028903	0.138067	0.037583	0.108079	0.655062	0.373759	-0.045831	-0.005776	-0.106789	-0.305037	-0.227514	-0.015730
-0.057710	0.162118	0.057470	0.025574	0.743354	0.314682	-0.239928	-0.170566	-0.158546	-0.439834	-0.114471	0.062850
0.031705	-0.005851	0.021448	-0.109974	0.540283	0.226605	-0.250523	-0.280926	-0.091678	-0.373571	0.216800	0.175874
0.127888	-0.097887	-0.005183	-0.115701	0.327231	0.128144	-0.100693	-0.153299	0.065494	0.071728	0.400990	0.015321
0.093456	0.029461	0.073981	-0.106919	0.325696	0.039709	0.018112	0.134990	0.212887	0.565288	0.174818	-0.366273
-0.079408	0.191430	0.199684	-0.141284	0.414371	-0.013632	0.014328	0.296441	0.300944	0.448622	-0.190085	-0.626280
-0.202117	0.177150	0.239835	-0.036664	0.278095	-0.011127	-0.039399	0.140996	0.333446	-0.079743	-0.337533	-0.654713
-0.096243	0.049003	0.170791	0.131379	-0.113412	0.046512	-0.058695	0.014869	0.308125	-0.124045	-0.243015	-0.554451
0.147349	-0.015994	0.058221	0.071791	-0.383174	0.134231	-0.023129	0.141746	0.203061	0.288394	-0.081579	-0.334099
0.261495	-0.012989	-0.062948	-0.084774	-0.273811	0.217654	0.071102	0.210072	0.030347	0.298243	0.005000	-0.007126
0.148471	-0.040036	-0.194981	0.014883	0.011684	0.273866	0.218339	0.097077	-0.135123	-0.231958	-0.005964	0.229018
-0.017306	-0.070464	-0.301132	0.253227	0.162932	0.298571	0.339081	-0.003149	-0.214081	-0.616661	-0.025624	0.183359
-0.057336	-0.010359	-0.285003	0.283785	0.113412	0.292842	0.305016	-0.034305	-0.196325	-0.389474	0.008403	-0.091675
0.002896	0.085079	-0.095206	0.140928	-0.024387	0.249877	0.104410	-0.224995	-0.137012	0.159606	0.010294	-0.332977
0.048546	0.051258	0.157658	0.030156	-0.060841	0.151775	-0.075343	-0.329350	-0.092811	0.464152	-0.123923	-0.287709
0.059025	-0.126438	0.267227	-0.059955	0.126463	-0.009695	-0.052263	0.105335	-0.074678	0.257712	-0.338667	0.038524
0.079235	-0.260547	0.150529	-0.177939	0.333757	-0.212988	0.099111	0.603238	-0.034254	-0.048694	-0.471371	0.324078
0.089340	-0.208706	-0.047569	-0.278359	0.233565	-0.405543	0.139611	0.350515	0.079856	0.132334	-0.430917	0.267940
0.023846	-0.057316	-0.102707	-0.384888	-0.071202	-0.527591	0.007139	-0.195341	0.225358	0.234228	-0.265699	-0.041544
-0.098862	0.029837	0.040210	-0.493326	-0.158309	-0.539759	-0.088585	-0.401797	0.258238	-0.349338	-0.088006	-0.269752
-0.176303	0.042238	0.182048	-0.442544	0.029726	-0.438829	0.026439	-0.193839	0.110468	-0.647710	0.076860	-0.269004
-0.157598	0.049754	0.097996	-0.176412	0.149880	-0.256653	0.225909	0.124854	-0.079589	-0.061568	0.305302	-0.158641
-0.098862	0.004667	-0.156346	0.074847	0.063507	-0.050855	0.242563	-0.004650	-0.140412	0.296728	0.559840	-0.059501
-0.068933	-0.164379	-0.305258	0.066062	-0.034748	0.119552	0.020761	-0.276422	-0.105656	-0.096782	0.623381	0.066218
-0.068559	-0.328917	-0.234365	-0.183284	-0.057388	0.206913	-0.220632	-0.313209	-0.105656	-0.236881	0.419145	0.295634
-0.062199	-0.297737	-0.121837	-0.410089	-0.142192	0.192591	-0.272467	-0.186332	-0.115101	0.134228	0.173305	0.555739
-0.042371	-0.119676	-0.136841	-0.332196	-0.316405	0.086612	-0.147609	0.041521	-0.019143	0.128167	0.061353	0.619736
-0.038256	-0.008481	-0.237366	0.042380	-0.400826	-0.074835	0.015841	0.327609	0.139569	-0.209618	-0.016550	0.375724
-0.074919	-0.006978	-0.321762	0.320454	-0.315638	-0.241979	0.135826	0.396704	0.209108	-0.120258	-0.147741	0.016069
-0.134403	0.023450	-0.377276	0.184473	-0.244648	-0.376195	0.186166	0.178909	0.152040	0.216046	-0.223356	-0.193807
-0.162835	0.116647	-0.418536	-0.141284	-0.367058	-0.470325	0.137718	0.072677	0.059070	0.211879	-0.149632	-0.212887
-0.122057	0.139570	-0.428289	-0.206576	-0.571586	-0.544770	0.011680	0.010740	-0.001009	0.010753	0.029583	-0.105891
-0.037134	0.030964	-0.378026	-0.013372	-0.599214	-0.625658	-0.077235	-0.229875	-0.030099	-0.055131	0.248948	0.140320
0.026840	-0.076099	-0.248994	0.002664	-0.422699	-0.716209	-0.053398	-0.447218	-0.059944	-0.072170	0.442216	0.419886
0.035822	-0.049052	-0.083953	-0.304323	-0.317173	-0.791728	-0.015562	-0.352998	-0.107545	-0.123666	0.506890	0.425125
0.011875	0.050506	-0.012310	-0.478435	-0.487933	-0.818571	-0.116584	0.011866	-0.121901	0.033472	0.417632	0.063598
-0.024040	0.089965	-0.101582	-0.103865	-0.768056	-0.784212	-0.308790	0.168398	-0.019143	0.388394	0.262942	-0.307911
-0.085768	0.086207	-0.200232	0.485848	-0.842499	-0.709767	-0.359868	0.015996	0.158843	0.392561	0.096905	-0.345697
-0.151986	0.121908	-0.120337	0.551165	-0.679798	-0.640332	-0.175986	0.085440	0.229894	0.043319	-0.113715	-0.138439
-0.125798	0.112889	0.064600	-0.029409	-0.549713	-0.619931	0.053312	0.344131	0.103287	-0.193715	-0.333753	0.032161
0.047798	-0.070464	0.116758	-0.572746	-0.641041	-0.663238	0.142639	0.110966	-0.085633	-0.166831	-0.426758	0.058359
0.261870	-0.299240	-0.004058	-0.550982	-0.826766	-0.743768	0.151344	-0.408179	-0.161568	-0.105491	-0.369669	-0.017227
0.334100	-0.297362	-0.097081	-0.214212	-0.831755	-0.809266	0.194115	-0.481001	-0.127945	-0.250891	-0.327325	-0.123100
0.205358	-0.070840	-0.046068	-0.050409	-0.576574	-0.809266	0.199035	0.033638	-0.092056	-0.303522	-0.384792	-0.160885
0.004018	0.092595	0.016947	-0.114556	-0.296835	-0.720504	0.051041	0.335494	-0.085633	-0.058918	-0.383658	-0.101028
-0.105222	0.043742	-0.066699	-0.184430	-0.230834	-0.554434	-0.174851	-0.076722	-0.070522	0.086122	-0.190085	-0.077833
-0.095495	-0.080607	-0.237366	-0.180230	-0.307963	-0.353289	-0.310682	-0.332728	-0.047477	-0.027112	0.048116	-0.165001
-0.061825	-0.139210	-0.294380	-0.169539	-0.329452	-0.172186	-0.303493	0.022377	-0.031610	-0.135783	0.106361	-0.165375
-0.050602	-0.155363	-0.166849	-0.223758	-0.294533	-0.058371	-0.199444	0.224342	0.000880	0.041425	-0.002562	0.079317
-0.004212	-0.185791	0.000818	-0.373815	-0.299138	-0.031170	-0.047723	-0.028299	0.043575	0.253167	-0.086494	0.308733
0.083352	-0.202320	0.018823	-0.509363	-0.312184	-0.064097	0.087756	-0.048194	0.019391	0.008481	-0.029027	0.139571
0.087468	-0.158744	-0.136466	-0.387943	-0.264986	-0.094878	0.124471	0.079434	-0.089411	-0.233094	0.116195	-0.339711
-0.069307	-0.079480	-0.302257	0.001901	-0.169437	-0.061592	0.056340	-0.056452	-0.174791	0.108091	0.194863	-0.641245
-0.273198	-0.026137	-0.336766	0.282639	-0.066597	0.054747	-0.037885	-0.095866	-0.158924	0.409606	0.091610	-0.515917
-0.365604	-0.000217	-0.315386	0.204717	-0.019782	0.214074	-0.113557	0.035140	-0.086011	0.006966	-0.122032	-0.181836
-0.334178	0.039608	-0.388904	0.025574	-0.084249	0.344400	-0.186202	-0.022293	0.004280	-0.490194	-0.240747	0.054991
-0.260852	0.059525	-0.478552	0.027865	-0.186321	0.384500	-0.214200	-0.155926	0.113869	-0.367513	-0.216928	0.099527
-0.175181	-0.025386	-0.367899	0.042380	-0.210880	0.321485	-0.115827	-0.128524	0.168669	-0.005908	-0.244906	-0.001140
-0.070430	-0.156866	-0.098206	-0.161138	-0.207810	0.196172	0.061261	-0.083854	0.073809	-0.046801	-0.407855	-0.148540
-0.007205	-0.151982	0.035332	-0.396725	-0.240427	0.081600	0.152858	-0.093989	-0.101500	-0.399698	-0.488762	-0.219995
-0.080531	0.002789	-0.085078	-0.368470	-0.136436	0.044006	0.108952	0.222840	-0.199725	-0.632564	-0.334509	-0.159015
-0.261975	0.089589	-0.283128	-0.122574	0.264275	0.105588	0.037415	0.392948	-0.188391	-0.462553	-0.118252	-0.008622
-0.374582	-0.006978	-0.407659	0.093182	0.740283	0.224099	0.012815	-0.183329	-0.146079	0.020598	-0.005208	0.153045
-0.286666	-0.125310	-0.454170	0.136726	0.891914	0.312534	0.006383	-0.477248	-0.142301	0.295212	0.085559	0.213299
-0.073049	-0.104274	-0.376151	-0.008408	0.610148	0.289620	0.006383	-0.105251	-0.194058	0.027413	0.205453	0.072955
0.091959	-0.020502	-0.096706	-0.282559	0.148728	0.133515	0.040443	0.012242	-0.215214	-0.361076	0.247057	-0.143302
0.151465	-0.047549	0.263850	-0.534182	-0.170588	-0.098099	0.084349	-0.255776	-0.055788	-0.312231	0.189946	-0.149288
0.189265	-0.194807	0.434206	-0.602910	-0.225845	-0.297097	0.071859	-0.365010	0.240476	-0.208861	0.132079	0.065844
0.264115	-0.320652	0.313005	-0.452853	-0.151402	-0.365815	-0.008373	-0.291437	0.373507	-0.438698	0.100310	0.184108
0.300418	-0.345446	0.075482	-0.186339	-0.116098	-0.275622	-0.089342	-0.259530	0.158087	-0.488679	0.101822	0.066592
0.182154	-0.314642	-0.050194	0.024047	-0.058923	-0.081635	-0.097288	-0.209605	-0.226925	-0.173268	0.204319	-0.045285
-0.068933	-0.236129	-0.009309	0.070645	0.161396	0.110959	-0.039399	-0.094740	-0.495154	-0.014616	0.365816	0.053868
-0.272450	-0.059570	0.079234	0.030156	0.387500	0.209061	-0.009130	-0.050070	-0.530665	0.088016	0.403638	0.260829
-0.274321	0.136564	0.081861	0.060332	0.306502	0.182208	-0.058695	-0.077097	-0.349706	0.389531	0.262564	0.384332
-0.116071	0.178277	0.012071	0.148186	-0.032062	0.066204	-0.107503	0.132362	-0.036899	0.455819	0.069296	0.357386
0.027588	0.084704	0.013947	0.115718	-0.229683	-0.066245	-0.057182	0.346760	0.215910	0.231197	-0.089518	0.187102
0.046301	0.033595	0.124638	-0.074082	-0.093075	-0.146775	0.061261	0.127858	0.220067	0.162637	-0.230539	-0.071099
-0.020673	0.036226	0.162161	-0.189393	0.156406	-0.140332	0.127877	-0.172818	-0.001009	0.138394	-0.311068	-0.270500
-0.075667	-0.024634	-0.002933	0.003428	0.200552	-0.056939	0.069588	-0.226122	-0.232592	0.007724	-0.213147	-0.274241
-0.094373	-0.065205	-0.199107	0.420913	-0.013259	0.054389	-0.088207	-0.147293	-0.299082	-0.050209	0.059462	-0.115618
-0.135899	0.095226	-0.196856	0.701661	-0.213182	0.128144	-0.256955	-0.006902	-0.215970	-0.090345	0.294334	0.037027
-0.220074	0.355654	-0.053570	0.629469	-0.160995	0.120268	-0.354193	0.175530	-0.118123	-0.112685	0.272019	0.063224
-0.239902	0.416909	0.028202	0.424733	-0.068900	0.035055	-0.373867	0.306955	-0.081100	0.115667	0.022019	-0.034810
-0.066315	0.211348	0.054844	0.388445	-0.311033	-0.075550	-0.370462	0.252881	-0.061455	0.356576	-0.229783	-0.193433
0.227813	-0.027264	0.182048	0.378132	-0.709345	-0.142838	-0.350031	0.197304	-0.015743	0.156576	-0.377231	-0.352805
0.372274	-0.094882	0.391804	0.095855	-0.704356	-0.122079	-0.240307	0.154885	0.020902	-0.236881	-0.536021	-0.459052
0.234549	-0.026888	0.472480	-0.206576	-0.258846	-0.018285	-0.021616	-0.029425	0.022791	-0.265658	-0.767023	-0.438102
0.032828	0.036977	0.320510	0.003428	0.127231	0.113823	0.177461	-0.266287	0.021280	-0.016131	-0.882335	-0.243938
0.027962	0.052385	0.103624	0.543525	0.271185	0.202258	0.196764	-0.238509	0.003524	-0.022568	-0.684603	-0.000018
0.151465	0.079442	0.044337	0.607697	0.406694	0.201542	0.044607	0.026131	-0.103767	-0.293677	-0.281579	0.028793
0.179909	0.124914	0.139647	0.001137	0.552567	0.119910	-0.110908	0.156011	-0.275660	-0.340251	0.027692	-0.224110
0.126016	0.110634	0.223324	-0.555182	0.520321	0.010708	-0.143447	0.031011	-0.359528	-0.045665	0.107117	-0.472146
0.155582	0.038856	0.234581	-0.543727	0.410532	-0.058013	-0.065505	-0.107503	-0.280193	0.204682	0.028827	-0.475887
0.238292	0.027206	0.231204	-0.284468	0.461588	-0.033317	0.068074	0.006987	-0.131723	0.097485	-0.134131	-0.364402
0.195253	0.080194	0.213943	-0.190539	0.560245	0.091625	0.216446	0.162392	-0.009320	-0.261114	-0.340936	-0.332603
0.033202	0.050130	0.163287	-0.159611	0.437788	0.270286	0.311450	0.008488	0.115381	-0.509883	-0.494055	-0.326991
-0.053969	-0.058068	0.144525	-0.047736	0.187884	0.421020	0.289497	-0.197968	0.280158	-0.391746	-0.525813	-0.289580
-0.006831	-0.028015	0.152405	-0.043536	0.141818	0.476515	0.186923	-0.187458	0.412811	-0.059675	-0.499726	-0.367395
0.023846	0.155729	0.033080	-0.142811	0.318402	0.428180	0.102896	-0.031677	0.406008	0.043697	-0.484981	-0.612438
-0.029278	0.180156	-0.217111	0.041616	0.373680	0.330078	0.072616	0.046776	0.241609	-0.072170	-0.430917	-0.796501
-0.010572	-0.089623	-0.325888	0.475917	0.122625	0.253458	0.048392	-0.037308	0.006547	0.047485	-0.275908	-0.712326
0.150717	-0.322155	-0.153720	0.505328	-0.187472	0.236630	-0.002698	-0.046317	-0.168746	0.229682	-0.089140	-0.411540
0.219953	-0.209833	0.057846	-0.007263	-0.260381	0.270644	-0.035237	-0.032052	-0.195569	0.016433	0.006512	-0.059501
-0.010572	0.064786	0.066101	-0.256977	-0.147948	0.320769	0.021518	0.137617	-0.123790	-0.186521	0.003488	0.218539
-0.338668	0.142201	-0.016811	0.180271	-0.063144	0.355499	0.151723	0.359152	-0.101123	-0.052859	0.018237	0.334182
-0.395533	0.010302	0.017322	0.590890	-0.034748	0.361585	0.220988	0.021626	-0.173657	-0.006286	0.128297	0.269063
-0.168821	-0.065581	0.108127	0.346810	0.029342	0.346548	0.122578	-0.399545	-0.233348	-0.082394	0.290173	0.144063
0.005889	0.007672	0.062348	-0.121811	0.168306	0.329004	-0.071938	-0.312458	-0.217481	0.065288	0.427465	0.113748
-0.055839	0.058022	-0.106834	-0.191685	0.408997	0.323633	-0.193390	-0.119890	-0.186124	0.312258	0.489114	0.198329
-0.178922	-0.014867	-0.209984	0.014883	0.715715	0.322201	-0.190364	-0.128524	-0.160813	0.276273	0.401369	0.287027
-0.144130	-0.063327	-0.158221	0.065680	0.861588	0.296780	-0.158960	-0.141662	-0.100367	0.084228	0.123759	0.302745
0.007759	0.046372	-0.034065	-0.124865	0.681166	0.221592	-0.162365	-0.030926	-0.038032	0.064909	-0.211257	0.262326
0.091211	0.180908	0.050716	-0.336778	0.388651	0.100576	-0.146474	0.258138	-0.042943	0.085364	-0.391597	0.153419
0.052663	0.132054	0.055594	-0.287141	0.278479	-0.027591	-0.062100	0.364785	-0.072033	-0.212647	-0.393866	-0.109258
-0.001219	-0.043417	0.020698	0.126031	0.246617	-0.114205	0.035523	0.153008	-0.033499	-0.593942	-0.365889	-0.483370
0.007759	-0.092253	0.059722	0.530920	0.017826	-0.136395	0.053312	0.137993	0.069274	-0.451951	-0.356815	-0.693994
0.034325	0.065538	0.234581	0.387299	-0.314103	-0.104183	-0.027670	0.230350	0.153930	0.122485	-0.286872	-0.509557
0.024220	0.220743	0.411692	-0.158084	-0.418861	-0.041549	-0.133232	0.025755	0.145993	0.364909	-0.139424	-0.046782
0.038816	0.163621	0.372292	-0.311959	-0.280719	0.031832	-0.160852	0.002482	0.026947	-0.044908	0.016724	0.345036
0.167558	-0.030645	0.117133	0.194786	-0.175577	0.099144	-0.080261	0.248750	-0.120012	-0.402727	0.154772	0.420634
0.334849	-0.108030	-0.089954	0.658117	-0.152937	0.139602	0.015463	0.113969	-0.144190	-0.142598	0.268993	0.203569
0.350567	-0.003597	-0.050945	0.490814	-0.007119	0.127070	0.010544	-0.237758	-0.020654	0.216046	0.298116	-0.090927
0.184774	0.085079	0.132142	0.070263	0.262356	0.046870	-0.058317	-0.294815	0.074943	0.067182	0.180491	-0.254413
0.037319	0.067041	0.240960	0.009155	0.382509	-0.085214	-0.027670	-0.117263	-0.005920	-0.071792	-0.033563	-0.233463
0.064265	0.118150	0.240210	0.178361	0.214755	-0.221578	0.153994	-0.096242	-0.169880	0.233470	-0.178365	-0.102150
0.190762	0.288762	0.246589	0.078285	-0.081179	-0.308192	0.319020	-0.328599	-0.228814	0.295970	-0.140558	0.059856
0.263741	0.309807	0.285238	-0.230249	-0.267672	-0.315350	0.289119	-0.158929	-0.165346	-0.124802	-0.012013	0.184856
0.243157	0.077939	0.269478	-0.253922	-0.231985	-0.248779	0.105924	0.443643	-0.088278	-0.242939	0.025801	0.195335
0.154834	-0.079856	0.196683	0.065680	-0.055085	-0.146059	-0.026535	0.557425	-0.016498	0.082712	-0.047174	0.058359
-0.012443	0.044493	0.170416	0.264687	0.072337	-0.050855	0.007896	0.208946	0.095729	0.272485	-0.123166	-0.165375
-0.235039	0.164373	0.204187	0.143602	0.090379	0.012856	0.126742	-0.014785	0.189077	0.228925	-0.150388	-0.318761
-0.359244	0.019318	0.184300	0.042380	0.129918	0.053673	0.188437	-0.077473	0.164890	0.184606	-0.097080	-0.224859
-0.248507	-0.167760	0.061973	0.188674	0.244698	0.104156	0.160807	-0.036932	0.077966	0.249379	0.080264	0.089422
-0.016932	-0.095634	-0.073450	0.313579	0.290379	0.182924	0.098732	-0.146167	0.078722	0.413015	0.231172	0.309482
0.080732	0.124538	-0.144718	0.168812	0.150648	0.270644	0.027196	-0.312458	0.182275	0.413773	0.102957	0.212176
0.007385	0.186169	-0.159347	-0.077519	-0.089621	0.316115	-0.057938	-0.215611	0.239342	0.042561	-0.185926	-0.006377
-0.013565	0.039232	-0.126338	-0.211539	-0.236973	0.274940	-0.126421	-0.132278	0.148261	-0.308445	-0.189707	-0.071473
0.142858	-0.115919	-0.061822	-0.260413	-0.174425	0.149627	-0.156311	-0.174695	-0.006676	-0.258085	0.171036	-0.069228
0.304909	-0.136205	-0.049069	-0.227576	0.016674	-0.001821	-0.186202	-0.005776	-0.082611	-0.025218	0.453940	-0.159015
0.248396	-0.055814	-0.143593	-0.016045	0.149112	-0.099888	-0.235010	0.271281	-0.059944	0.210364	0.391157	-0.148166
-0.009824	0.028334	-0.245618	0.267361	0.152183	-0.094878	-0.230091	0.326858	0.002769	0.432712	0.223986	0.171009
-0.236161	0.059525	-0.208109	0.339935	0.072720	-0.001463	-0.112422	0.265649	0.102154	0.403167	0.167632	0.542640
-0.240276	0.033595	-0.033690	0.125649	-0.084249	0.109885	0.044228	0.189419	0.245011	0.100137	0.082533	0.581563
-0.072674	-0.014867	0.137395	-0.169539	-0.268439	0.165022	0.120686	0.030260	0.335714	-0.100190	-0.110690	0.343164
0.052663	-0.056941	0.193681	-0.286377	-0.280719	0.134231	0.107438	-0.051947	0.271088	-0.170239	-0.200671	0.127221
0.021228	-0.100517	0.131767	-0.107683	-0.063144	0.050092	0.072616	-0.079350	0.094973	-0.286104	-0.074017	0.001479
-0.078286	-0.129443	0.026701	0.199370	0.129534	-0.020790	0.034009	-0.030176	-0.031610	-0.297464	0.111278	-0.096538
-0.122805	-0.076851	-0.032565	0.275764	0.136060	-0.029380	-0.031453	0.090320	-0.004031	0.014539	0.253487	-0.080077
-0.105970	0.025328	-0.025063	-0.003063	0.157941	0.023239	-0.093882	0.137617	0.110846	0.369834	0.394182	0.130215
-0.073423	0.019318	-0.036316	-0.338305	0.362932	0.095563	-0.105612	0.069299	0.142214	0.394076	0.500082	0.397057
-0.030026	-0.109157	-0.142092	-0.409325	0.549112	0.143898	-0.082910	-0.073344	0.042819	0.226273	0.497057	0.546383
0.019357	-0.135078	-0.251995	-0.237122	0.430110	0.146404	-0.051506	0.011491	-0.032743	0.189152	0.428600	0.555365
0.032453	0.029837	-0.178101	-0.049646	0.047385	0.107378	0.029467	0.261518	0.035638	0.190288	0.349931	0.470410
0.002522	0.124162	0.086739	-0.016809	-0.262300	0.050450	0.182760	0.125981	0.139191	0.009617	0.233441	0.324452
-0.004212	-0.074221	0.291242	-0.140902	-0.247718	0.009276	0.313343	-0.294815	0.113869	-0.090724	0.101822	0.181488
0.035073	-0.390149	0.222949	-0.246285	-0.003666	0.014289	0.297445	-0.235130	-0.016498	0.049000	0.068539	0.147431
0.017861	-0.488947	-0.022062	-0.163811	0.173296	0.073723	0.130526	0.119599	-0.105278	0.217182	0.199023	0.277296
-0.131410	-0.290975	-0.174350	0.034740	0.170609	0.164664	-0.063614	0.130860	-0.085633	0.358470	0.419901	0.459931
-0.287040	-0.005100	-0.116961	0.156207	0.125312	0.243075	-0.159717	-0.006527	0.001635	0.482712	0.526558	0.444961
-0.254867	0.145583	0.016572	0.173396	0.124160	0.271360	-0.144204	0.045650	0.118405	0.465288	0.331777	0.144437
-0.049105	0.144080	0.024075	0.151241	0.121089	0.240568	-0.087450	0.056536	0.255215	0.188773	-0.070615	-0.164253
0.115163	0.114392	-0.137966	0.054221	0.123008	0.169677	-0.019346	-0.183704	0.369727	-0.293299	-0.333753	-0.186325
0.093456	0.104245	-0.315761	-0.124865	0.159861	0.092341	0.089270	-0.242638	0.384466	-0.605302	-0.283469	-0.034062
-0.048357	0.066290	-0.322512	-0.239031	0.147577	0.034339	0.204334	0.106837	0.273733	-0.434533	-0.091030	0.020934
-0.146374	0.026831	-0.148844	-0.177939	0.047768	0.001758	0.202063	0.340001	0.112736	0.004695	0.081777	0.023928
-0.102603	0.052009	0.033455	0.016028	-0.024771	-0.019001	0.039686	0.096701	0.012591	0.124000	0.282231	0.178494
0.040687	0.070799	0.077733	0.254373	-0.043190	-0.045844	-0.152528	-0.061707	0.023547	-0.035820	0.498948	0.413524
0.144729	-0.023507	0.017698	0.382334	-0.127994	-0.095951	-0.218362	0.190170	0.116893	0.146349	0.557571	0.496607
0.107678	-0.131321	-0.020937	0.190202	-0.252706	-0.173260	-0.121881	0.335494	0.225736	0.433470	0.405151	0.392566
-0.021421	-0.087745	0.007570	-0.250486	-0.265753	-0.267032	0.071859	0.134614	0.282048	0.162637	0.189568	0.227895
-0.092876	0.044117	0.054844	-0.487981	-0.201287	-0.351857	0.257324	0.009239	0.269954	-0.280803	0.030340	0.099152
-0.024040	0.084704	0.085613	-0.266522	-0.180565	-0.403038	0.310693	0.064044	0.248790	-0.290648	-0.013526	0.069212
0.110672	0.030589	0.106626	0.082486	-0.138738	-0.410196	0.171405	0.053909	0.263151	-0.057025	0.141913	0.145560
0.174295	-0.001719	0.114131	0.145512	0.012452	-0.385858	-0.056425	-0.206977	0.235563	0.110743	0.462261	0.233883
0.117409	0.004291	0.068727	-0.000008	0.127615	-0.359373	-0.170689	-0.569965	0.063227	0.184606	0.746679	0.288898
0.013745	0.001286	-0.037816	-0.039718	0.023200	-0.362952	-0.096531	-0.518914	-0.195569	0.193697	0.873759	0.367491
-0.033767	0.010302	-0.104958	0.038942	-0.231217	-0.411270	0.021140	-0.075221	-0.364817	0.166425	0.837450	0.447206
0.009256	0.056895	-0.007059	0.004955	-0.385093	-0.489652	0.024546	0.344131	-0.370106	0.114152	0.582533	0.449452
0.099070	0.090341	0.193305	-0.192448	-0.317173	-0.555865	-0.034102	0.533767	-0.273393	0.184985	0.137375	0.422506
0.172049	0.050506	0.245463	-0.313105	-0.221240	-0.564097	0.019247	0.312964	-0.133234	0.264152	-0.249821	0.398179
0.202364	-0.051306	0.042461	-0.128683	-0.383174	-0.495021	0.204334	0.003608	0.022791	-0.043393	-0.413904	0.249976
0.195253	-0.126062	-0.188979	0.255137	-0.762300	-0.378700	0.347408	-0.129650	0.144482	-0.373571	-0.454357	0.006716
0.143232	-0.081359	-0.176226	0.457200	-0.979491	-0.277770	0.313721	-0.271542	0.206462	-0.087695	-0.440747	-0.058005
0.032079	0.058022	0.034956	0.232601	-0.794533	-0.239115	0.149073	-0.241137	0.228004	0.403546	-0.320142	0.084182
-0.091380	0.149341	0.150904	-0.211539	-0.404663	-0.247347	-0.045453	0.109840	0.188321	0.267940	-0.151900	0.112251
-0.122431	0.116271	0.008695	-0.405125	-0.202821	-0.230883	-0.238415	0.188668	0.064361	-0.286483	-0.026380	-0.103646
-0.034889	0.026831	-0.235491	-0.121047	-0.316789	-0.124584	-0.409054	-0.048569	-0.026699	-0.467097	0.139644	-0.345697
0.044804	-0.047549	-0.323263	0.353304	-0.415024	0.065488	-0.463916	-0.035431	0.071541	-0.223249	0.365438	-0.477010
-0.025536	-0.078353	-0.215236	0.505328	-0.114947	0.256680	-0.319384	-0.026797	0.283182	0.101273	0.409311	-0.546968
-0.217082	-0.023507	-0.092205	0.198606	0.415523	0.354424	-0.035994	-0.113884	0.351965	0.410743	0.138509	-0.524148
-0.362611	0.074181	-0.072700	-0.149684	0.612068	0.321843	0.200549	0.045275	0.194746	0.359606	-0.195000	-0.321005
-0.357373	0.069672	-0.088454	-0.152357	0.314179	0.200468	0.243698	0.218709	-0.025565	-0.182734	-0.297836	-0.025457
-0.231298	-0.020126	-0.050945	0.018319	-0.058539	0.075155	0.111980	0.252130	-0.149479	-0.501174	-0.205586	0.155290
-0.231298	-0.020126	-0.050945	0.018319	-0.058539	0.014647	0.111980	0.207068	-0.149479	-0.052859	-0.205586	0.155290
0.091211	0.106876	0.034956	-0.275686	0.024352	0.038993	-0.068911	0.085065	-0.059944	0.539152	-0.259272	-0.051645
0.158576	0.058022	-0.043818	-0.427271	0.198248	0.120268	0.047635	0.173278	-0.012343	0.388773	-0.457760	-0.195304
0.144355	-0.144845	-0.193105	-0.348996	0.218594	0.210135	0.192601	0.343005	-0.092433	-0.329270	-0.537533	-0.170238
0.117034	-0.233875	-0.291005	-0.193212	0.114179	0.266347	0.215689	0.301322	-0.192169	-0.579933	-0.353790	0.012328
0.104684	-0.156114	-0.223863	-0.145102	0.093066	0.272434	0.074130	-0.082728	-0.146457	-0.060054	-0.013526	0.187476
0.073995	-0.109533	-0.052445	-0.212685	0.256598	0.239494	-0.107882	-0.620641	-0.041810	0.211500	0.220960	0.191593
0.039190	-0.159495	0.029328	-0.226431	0.403239	0.197962	-0.157068	-0.651797	-0.101878	-0.331920	0.253487	0.025051
0.045926	-0.206077	-0.050945	-0.075992	0.313028	0.172183	-0.047723	-0.116137	-0.285104	-0.877169	0.207344	-0.141058
0.051166	-0.210209	-0.135341	0.082104	0.083085	0.158220	0.068831	0.223215	-0.338372	-0.529952	0.169145	-0.120856
-0.015061	-0.164003	-0.053945	0.034740	-0.021317	0.129577	0.048013	-0.088734	-0.201236	0.316803	0.097662	0.090545
-0.107841	-0.025761	0.136270	-0.156938	0.058133	0.064414	-0.079505	-0.412308	-0.050499	0.516046	-0.011635	0.275799
-0.144878	0.154978	0.217320	-0.259649	0.144122	-0.031170	-0.145339	-0.319215	0.005413	0.119076	-0.090274	0.207685
-0.148245	0.259826	0.073981	-0.174121	0.116099	-0.120647	-0.036750	-0.011031	0.038284	0.005830	-0.124679	-0.085689
-0.169569	0.274106	-0.170599	0.046581	0.048536	-0.163954	0.158536	0.102332	0.138435	0.106955	-0.168535	-0.328487
-0.168821	0.236902	-0.274125	0.283785	0.045081	-0.144269	0.252404	-0.096242	0.272977	0.094455	-0.236588	-0.325120
-0.105970	0.123411	-0.117336	0.337261	0.061204	-0.078414	0.192979	-0.041437	0.299055	0.128925	-0.276286	-0.176972
-0.036012	-0.042666	0.145651	0.109606	-0.008654	-0.004684	0.098732	0.328360	0.125585	0.137637	-0.205964	-0.123849
-0.017680	-0.139961	0.239459	-0.101956	-0.144878	0.038993	0.056340	0.576951	-0.127568	-0.175919	-0.004452	-0.249924
-0.014687	-0.148977	0.108878	0.128705	-0.205124	0.034697	0.023789	0.349389	-0.241281	-0.347824	0.190325	-0.415281
0.016364	-0.172643	-0.014561	0.660791	-0.124157	-0.016853	-0.039399	-0.145040	-0.172146	0.068697	0.187299	-0.404806
0.035073	-0.210209	0.049215	0.794862	-0.042422	-0.099172	-0.112422	-0.404425	-0.056166	0.371728	0.003110	-0.169116
0.009256	-0.164003	0.215819	0.197078	-0.129145	-0.187576	-0.193390	-0.059455	0.044708	0.145591	-0.161730	0.031039
0.018235	-0.057316	0.308127	-0.560909	-0.316789	-0.246274	-0.281926	0.452280	0.168669	0.020598	-0.252089	-0.113747
0.135747	0.017439	0.251467	-0.665148	-0.388163	-0.238399	-0.304628	0.270530	0.279402	0.085743	-0.416550	-0.476262
0.264115	0.083200	0.073981	-0.037809	-0.301824	-0.144269	-0.195282	-0.302698	0.280536	-0.217948	-0.662675	-0.573905
0.232678	0.176774	-0.099332	0.601585	-0.186705	0.016795	-0.032210	-0.539560	0.160733	-0.657555	-0.739424	-0.279105
0.050417	0.199322	-0.104208	0.574465	-0.048178	0.185789	0.042336	-0.195716	-0.038032	-0.447407	-0.498214	-0.023213
-0.086142	0.092595	0.070979	-0.012990	0.206694	0.298213	-0.001185	0.153758	-0.315327	0.055061	-0.126947	-0.098035
-0.062573	-0.022380	0.237583	-0.449417	0.483085	0.319337	-0.078748	-0.097743	-0.624356	-0.010830	0.119220	-0.193059
0.014494	-0.044544	0.253343	-0.313868	0.558709	0.261335	-0.121124	-0.319965	-0.780760	-0.307309	0.211505	0.065095
0.001774	-0.017121	0.178296	0.023665	0.420897	0.167887	-0.119611	0.091446	-0.628890	-0.255056	0.231550	0.484257
-0.076041	0.045245	0.111504	-0.003827	0.289227	0.085180	-0.076856	0.420361	-0.255259	-0.256570	0.150234	0.562476
-0.096243	0.173392	0.022199	-0.295541	0.306118	0.040425	0.018490	-0.069590	0.071163	-0.366377	-0.083469	0.198329
-0.031522	0.236526	-0.157471	-0.264995	0.395945	0.031474	0.163456	-0.565085	0.153174	-0.149414	-0.343204	-0.170238
0.036570	0.091468	-0.358146	0.182563	0.415139	0.035771	0.287226	-0.233254	0.011080	0.124758	-0.408611	-0.181462
0.053037	-0.059570	-0.402032	0.421677	0.285388	0.027178	0.275114	0.239738	-0.177058	0.081955	-0.232429	0.005594
0.044804	0.070423	-0.223863	0.057658	0.004393	-0.006832	0.106681	0.173278	-0.244303	0.040288	0.025801	0.082311
0.068756	0.282374	0.002694	-0.403597	-0.346336	-0.053360	-0.073073	-0.220491	-0.163457	0.235743	0.217178	0.083060
0.163067	0.155729	0.057095	-0.268813	-0.604587	-0.081635	-0.125286	-0.343239	-0.026321	0.218697	0.312110	0.122730
0.292184	-0.204199	-0.049069	0.326566	-0.669053	-0.070540	-0.083667	-0.030926	0.089304	-0.043772	0.301142	0.020560
0.308651	-0.319150	-0.080202	0.668048	-0.625692	-0.029022	-0.041669	0.249877	0.183030	-0.113443	0.170657	-0.329984
0.098696	-0.129067	0.119009	0.493869	-0.590005	0.006412	-0.000806	0.050530	0.258238	0.027035	0.022775	-0.622913
-0.211844	0.035098	0.399684	0.209683	-0.492154	0.001400	0.037037	-0.208103	0.269198	0.198622	0.009916	-0.596351
-0.364481	0.085079	0.452592	0.208537	-0.220857	-0.042265	-0.013292	0.000605	0.183786	0.107334	0.097662	-0.378244
-0.291156	0.162118	0.188427	0.473243	0.104966	-0.088793	-0.171446	0.249501	0.049621	-0.295571	0.087828	-0.111877
-0.158720	0.201577	-0.115086	0.704717	0.283085	-0.099172	-0.293277	0.163518	-0.044077	-0.398183	-0.059650	0.232386
-0.089884	0.091092	-0.127464	0.524809	0.355254	-0.058371	-0.239550	-0.060956	-0.064855	0.113016	-0.155303	0.530664
-0.050602	0.000159	0.143774	-0.148538	0.470033	0.025030	-0.040534	-0.054200	-0.070522	0.583470	-0.111446	0.508583
-0.002716	0.095602	0.395182	-0.760222	0.547193	0.134947	0.167241	0.223966	-0.126812	0.423621	-0.104641	0.161652
0.032079	0.200074	0.421823	-0.667439	0.445849	0.262767	0.275114	0.238236	-0.208414	0.011131	-0.259272	-0.184080
0.078861	0.106876	0.308878	-0.079046	0.338747	0.399537	0.256567	-0.151422	-0.223147	-0.184628	-0.387061	-0.224859
0.184774	-0.057316	0.206063	0.205481	0.477711	0.524851	0.144531	-0.274545	-0.136257	-0.346309	-0.253979	0.062850
0.281705	-0.064830	0.093118	-0.040864	0.696137	0.599680	-0.006482	-0.104124	-0.016121	-0.539796	0.070052	0.425500
0.245777	0.023074	-0.089954	-0.331433	0.629726	0.581421	-0.125665	-0.051572	0.048866	-0.433018	0.361278	0.566218
0.123022	-0.028391	-0.233990	-0.378779	0.334141	0.450737	-0.151014	0.002482	0.026569	-0.127831	0.560597	0.415021
0.106181	-0.210960	-0.200982	-0.347469	0.174064	0.236988	-0.117341	-0.012158	-0.047855	0.092182	0.692972	0.092790
0.243157	-0.242891	-0.077201	-0.299359	0.177903	0.017153	-0.140042	-0.149170	-0.087900	0.283470	0.654394	-0.243938
0.332229	-0.017872	-0.052070	-0.104247	0.066578	-0.115636	-0.215335	-0.172443	-0.010076	0.370591	0.364682	-0.374503
0.193756	0.166628	-0.136091	0.183709	-0.154088	-0.101678	-0.156311	-0.102998	0.167157	0.274000	-0.034320	-0.170987
-0.072674	0.052385	-0.188229	0.356742	-0.223927	0.045080	0.113494	0.199933	0.303590	0.223243	-0.365511	0.057610
-0.202865	-0.172643	-0.125963	0.318163	-0.159076	0.238420	0.361034	0.599483	0.286961	0.130819	-0.626380	-0.120107
-0.105596	-0.201193	0.012821	0.061096	-0.175193	0.367672	0.335296	0.487954	0.173960	-0.174404	-0.799159	-0.502075
0.015616	-0.041915	0.115632	-0.313868	-0.196298	0.364808	0.120686	0.050906	0.102910	-0.211511	-0.703885	-0.493471
-0.066689	0.133182	0.069853	-0.442925	0.015907	0.245223	-0.003833	-0.047443	0.088170	0.161879	-0.270614	-0.115992
-0.285918	0.261705	-0.087704	-0.031318	0.380590	0.089476	0.032495	0.186791	-0.003654	0.286879	0.223607	0.030290
-0.370467	0.300788	-0.166098	0.547345	0.576751	-0.020432	0.051041	0.113969	-0.234103	0.048622	0.435408	-0.172483
-0.224190	0.190303	-0.079452	0.566062	0.488459	-0.060160	-0.053776	-0.341362	-0.430930	-0.052481	0.344636	-0.198671
-0.038630	0.018191	0.021448	0.005719	0.282317	-0.075193	-0.174094	-0.541437	-0.360662	0.135743	0.166497	0.166518
-0.005709	-0.053184	-0.011185	-0.339069	0.154103	-0.137111	-0.197174	-0.389410	-0.050121	0.238394	-0.000293	0.466667
-0.089884	-0.015994	-0.111710	-0.014900	0.109573	-0.279559	-0.141177	-0.069590	0.202305	-0.080879	-0.207477	0.293763
-0.135525	0.035098	-0.110209	0.456054	-0.020550	-0.468535	-0.047344	0.226970	0.190967	-0.525408	-0.426002	-0.203160
-0.068559	0.056519	0.051467	0.413273	-0.333673	-0.626016	0.066938	0.225093	0.046598	-0.453087	-0.514093	-0.619546
0.073621	-0.000592	0.259722	-0.022918	-0.669053	-0.680418	0.119550	0.003233	0.007302	-0.006665	-0.422977	-0.718686
0.228561	-0.189172	0.353531	-0.264231	-0.814871	-0.611341	0.042714	0.043398	0.073809	0.122864	-0.255870	-0.517788
0.344579	-0.402921	0.307752	-0.118756	-0.774579	-0.458514	-0.048101	0.071176	0.071163	0.067561	-0.129594	-0.214757
0.377513	-0.435979	0.243587	0.096237	-0.668286	-0.295307	0.027574	-0.163434	-0.031988	0.173622	-0.111446	-0.048278
0.307903	-0.248526	0.234956	0.092418	-0.545108	-0.187218	0.225909	-0.149920	-0.082611	0.047106	-0.240369	-0.066609
0.162319	0.003916	0.210941	-0.091265	-0.408501	-0.152859	0.296310	0.088443	-0.006676	-0.337979	-0.444149	-0.101776
-0.002342	0.186545	0.107752	-0.234831	-0.228148	-0.161091	0.114630	0.239738	0.105933	-0.274745	-0.517117	-0.052019
-0.130662	0.288762	-0.028814	-0.155793	0.068498	-0.157154	-0.142691	0.023503	0.159599	0.049000	-0.347363	-0.042292
-0.182663	0.335361	-0.151095	0.108842	0.392490	-0.103825	-0.213444	-0.315085	0.113869	-0.047180	-0.053223	-0.162008
-0.152734	0.310934	-0.256871	0.253227	0.462356	-0.007905	-0.066641	-0.117638	-0.062211	-0.072170	0.239871	-0.230470
-0.076790	0.188800	-0.282753	0.028247	0.240091	0.086254	0.071480	0.210072	-0.306638	0.518697	0.518237	-0.050897
0.002148	0.008799	-0.160472	-0.372288	0.075791	0.136737	0.011680	0.026881	-0.436597	0.777788	0.675574	0.261952
0.066136	-0.133575	-0.004058	-0.523872	0.137212	0.139602	-0.170689	-0.261031	-0.350461	0.115667	0.558328	0.445335
0.105058	-0.187670	-0.012685	-0.295923	0.119170	0.131009	-0.241064	-0.137533	-0.134745	-0.281939	0.291308	0.428868
0.095328	-0.171892	-0.160472	0.082868	-0.181716	0.153207	-0.098044	0.158638	0.092327	0.245212	0.124515	0.288898
0.021228	-0.086618	-0.225738	0.349102	-0.463758	0.218012	0.112737	0.112467	0.262773	0.446728	0.012185	0.064347
-0.105222	0.064035	-0.143968	0.384626	-0.413873	0.297855	0.177839	-0.153299	0.289984	-0.218706	-0.181768	-0.135446
-0.245514	0.175271	-0.077576	0.241386	-0.169437	0.349054	0.062396	-0.279425	0.154308	-0.732148	-0.274395	-0.082322
-0.324826	0.140698	-0.116211	0.120684	-0.012491	0.341893	-0.098044	-0.122143	0.016747	-0.782886	-0.070993	0.252221
-0.263845	0.027958	-0.149219	0.157353	0.028575	0.282101	-0.195282	0.037767	0.022791	-0.607195	0.229659	0.554242
-0.094747	-0.015618	-0.079452	0.226490	0.061204	0.207987	-0.216092	0.110215	0.079856	-0.047558	0.363925	0.562102
0.014494	0.024953	0.021073	0.164228	0.109573	0.163232	-0.146096	0.086191	0.034126	0.431955	0.372246	0.370111
-0.036012	0.068920	0.026701	0.073701	0.161780	0.166813	0.018490	-0.040311	-0.061455	0.108091	0.349931	0.196832
-0.120935	0.085079	-0.059572	0.137490	0.232030	0.200468	0.170648	0.017122	-0.055033	-0.409543	0.254621	0.115245
-0.084272	0.065538	-0.107209	0.242150	0.311876	0.221951	0.174433	0.199558	0.071919	-0.273231	0.131701	0.122356
0.016738	-0.008857	-0.020937	0.086688	0.374448	0.195456	0.065424	0.068924	0.225358	0.059606	0.131323	0.204317
0.040313	-0.099014	0.152405	-0.349378	0.423968	0.111675	0.024925	-0.110506	0.303968	0.143697	0.239114	0.254841
0.033202	-0.126062	0.286739	-0.693021	0.460053	-0.005758	0.114251	-0.000521	0.225358	0.199379	0.303789	0.164272
0.139489	-0.099390	0.297245	-0.605201	0.445081	-0.115994	0.177461	0.071927	0.008435	0.088773	0.287904	0.025425
0.312393	-0.102020	0.199309	-0.190921	0.352183	-0.186145	0.068831	-0.175821	-0.173657	-0.244454	0.289039	0.041143
0.358052	-0.154987	0.087864	0.101203	0.223968	-0.211556	-0.123394	-0.417187	-0.182724	-0.247104	0.404394	0.210305
0.234924	-0.195183	0.051467	-0.011463	0.136444	-0.212988	-0.185067	-0.148043	-0.093945	0.203925	0.597284	0.278045
0.103561	-0.183913	0.090491	-0.317305	0.088459	-0.215493	-0.073451	0.440264	-0.065611	0.619076	0.623759	0.057236
0.076241	-0.153109	0.151654	-0.378779	-0.004817	-0.226231	0.040065	0.665198	-0.132479	0.653167	0.273910	-0.276860
0.085597	-0.133951	0.208315	-0.084392	-0.172123	-0.229452	0.030224	0.237860	-0.198591	0.391425	-0.241125	-0.330732
0.024595	-0.086993	0.255219	0.210447	-0.314487	-0.200103	-0.012157	-0.053449	-0.146835	0.028549	-0.496323	0.010458
-0.096992	0.027206	0.268728	0.150859	-0.342499	-0.123153	0.054826	0.217958	0.039039	-0.091860	-0.472127	0.360006
-0.171066	0.122659	0.216945	-0.140520	-0.280719	-0.005042	0.213418	0.339250	0.192856	0.264152	-0.501994	0.265320
-0.121683	0.061028	0.070228	-0.243995	-0.185554	0.127429	0.314100	0.077557	0.117271	0.519455	-0.634698	-0.199419
-0.006457	-0.111036	-0.183728	-0.034754	-0.046260	0.241285	0.245969	-0.103374	-0.131345	0.150894	-0.586683	-0.520033
0.017861	-0.155363	-0.469924	0.227254	0.157941	0.308238	0.020004	0.220962	-0.279060	-0.173268	-0.296323	-0.397324
-0.120561	0.035850	-0.623713	0.385390	0.336444	0.308954	-0.235767	0.390695	-0.192925	0.003180	-0.032807	-0.066609
-0.289659	0.274482	-0.538942	0.467895	0.311108	0.236272	-0.349274	-0.146917	-0.023676	0.113016	0.015589	0.084182
-0.297515	0.324839	-0.306008	0.308613	0.015907	0.102366	-0.251279	-0.504275	0.045086	0.089531	-0.082335	-0.020968
-0.136648	0.168507	-0.133840	-0.196648	-0.370128	-0.057297	-0.079126	-0.121016	0.024302	0.179682	-0.188195	-0.187822
0.026840	-0.029893	-0.147719	-0.521200	-0.590772	-0.189724	-0.035615	0.148128	0.042441	0.010374	-0.243015	-0.306789
0.055657	-0.085866	-0.259122	-0.111501	-0.567365	-0.248421	-0.129448	-0.213734	0.148261	-0.390989	-0.276664	-0.425756
-0.059581	0.057646	-0.260247	0.597383	-0.407349	-0.216567	-0.159338	-0.375521	0.256349	-0.295571	-0.323166	-0.528637
-0.232794	0.236150	-0.076451	0.764305	-0.263067	-0.117784	-0.004590	-0.008404	0.254459	0.294834	-0.342070	-0.502449
-0.295271	0.204207	0.132893	0.392647	-0.215485	-0.008979	0.189573	0.257763	0.126341	0.367940	-0.287628	-0.345322
-0.104100	-0.035528	0.191804	0.041998	-0.190542	0.049734	0.219096	0.252130	-0.033121	-0.277017	-0.198403	-0.179217
0.228187	-0.203072	0.131016	-0.141665	-0.039353	0.026104	0.118036	0.242367	-0.103389	-0.590535	-0.127325	-0.068480
0.364414	-0.117046	0.097245	-0.252013	0.191338	-0.065529	0.084728	0.225468	-0.032365	-0.188414	-0.097458	-0.019471
0.158576	0.112513	0.141148	-0.170684	0.267346	-0.174692	0.186166	-0.045191	0.141080	0.027035	-0.153034	-0.054638
-0.104474	0.286132	0.213943	0.051165	0.152183	-0.248063	0.308422	-0.214485	0.328155	-0.208861	-0.250955	-0.131705
-0.059955	0.288386	0.272480	0.070263	0.091147	-0.259158	0.357249	-0.024920	0.426795	-0.310338	-0.186683	-0.145173
0.266361	0.061028	0.287114	-0.131356	0.178287	-0.219072	0.317885	0.252505	0.367082	-0.238395	0.095771	-0.103272
0.526465	-0.325912	0.229328	-0.206194	0.238555	-0.159659	0.168377	0.325731	0.186432	-0.152064	0.317405	-0.084193
0.483426	-0.574972	0.150153	-0.072937	0.181742	-0.112057	-0.068154	0.068548	0.030347	0.146728	0.296225	-0.034062
0.208726	-0.398038	0.185425	0.040088	0.085005	-0.087361	-0.219497	-0.302323	0.002769	0.423243	0.254999	0.120485
-0.086891	0.080194	0.382424	0.050019	-0.036283	-0.070898	-0.121881	-0.277923	0.046976	0.191425	0.390778	0.236503
-0.231672	0.386094	0.571167	0.006483	-0.160227	-0.033317	0.127498	0.109089	0.039417	-0.034306	0.500461	0.136952
-0.150116	0.244794	0.517508	-0.122956	-0.123006	0.053315	0.256946	0.272783	-0.054655	0.283849	0.343880	-0.058379
0.083726	-0.110660	0.201561	-0.300887	0.106886	0.189369	0.160428	0.111716	-0.172902	0.412637	0.057571	-0.041918
0.249145	-0.282711	-0.154095	-0.321505	0.292298	0.337239	-0.003833	-0.047067	-0.256393	-0.114957	-0.048686	0.299751
0.182154	-0.175649	-0.339767	-0.135556	0.317634	0.430329	-0.063992	-0.033554	-0.290771	-0.339872	0.123002	0.742865
-0.034889	0.031340	-0.351395	0.008010	0.344506	0.416007	-0.042047	0.033263	-0.282838	0.096728	0.401747	0.935979
-0.166951	0.180156	-0.338266	-0.058046	0.425887	0.291410	-0.062857	-0.135281	-0.262059	0.315288	0.543956	0.768688
-0.098862	0.207590	-0.426038	-0.159611	0.385964	0.109885	-0.146474	-0.436332	-0.264326	0.017568	0.473229	0.538149
0.048172	0.097857	-0.564823	-0.080955	0.159861	-0.055865	-0.188850	-0.322968	-0.273015	-0.181599	0.355983	0.546009
0.062393	-0.050179	-0.548319	0.082868	-0.114180	-0.157154	-0.140799	0.123728	-0.217103	0.002044	0.340476	0.607012
-0.126172	-0.050179	-0.268124	0.103877	-0.337894	-0.191871	-0.094261	0.363658	-0.070522	0.179682	0.300763	0.363374
-0.361863	0.118901	0.084487	-0.009554	-0.518247	-0.185787	-0.118097	0.243117	0.085903	0.139531	0.066270	-0.047156
-0.403015	0.230513	0.221448	-0.049264	-0.649867	-0.161091	-0.136259	0.119599	0.161110	0.016811	-0.235454	-0.220743
-0.159094	0.102366	0.099872	0.067590	-0.694379	-0.121721	-0.068911	0.111716	0.183030	-0.131618	-0.356437	-0.196800
0.184399	-0.157993	-0.124088	0.192494	-0.615715	-0.059444	0.024168	0.006987	0.240476	-0.190307	-0.298592	-0.283594
0.306406	-0.276325	-0.342768	0.149713	-0.394686	0.025388	0.066181	-0.008404	0.330045	0.059985	-0.218441	-0.410044
0.077364	-0.113290	-0.490555	-0.040864	-0.086168	0.109885	0.072994	0.240489	0.346674	0.341046	-0.129216	-0.327365
-0.253744	0.187672	-0.459422	-0.129065	0.171377	0.152849	0.055583	0.419235	0.228760	0.341803	0.031474	-0.159763
-0.324452	0.319954	-0.235116	0.084778	0.281166	0.114539	-0.012157	0.180410	0.051133	0.028170	0.184273	-0.139561
-0.098114	0.145207	0.025200	0.375076	0.275024	-0.017927	-0.074964	-0.289185	-0.053899	-0.443621	0.182004	-0.142928
0.126016	-0.117422	0.189928	0.268124	0.224736	-0.211556	-0.021994	-0.578974	-0.033877	-0.433397	0.012942	0.037027
0.136870	-0.168511	0.274731	-0.253922	0.131838	-0.399817	0.144910	-0.574845	0.028458	0.186122	-0.158705	0.288524
0.037693	-0.041915	0.311504	-0.608256	-0.018631	-0.516495	0.297445	-0.247518	0.009569	0.585743	-0.148119	0.356263
0.015990	-0.003973	0.270228	-0.394434	-0.154855	-0.530096	0.318642	0.244244	-0.092433	0.412258	0.046603	0.137700
0.085223	-0.098263	0.160660	0.113808	-0.189007	-0.458872	0.189951	0.546159	-0.129079	0.189531	0.198645	-0.250298
0.137244	-0.115168	0.092742	0.445359	-0.146413	-0.356868	0.007518	0.324605	0.014858	0.248243	0.094258	-0.493845
0.112918	-0.009608	0.176045	0.429316	-0.117633	-0.283138	-0.071181	-0.054200	0.249546	0.210743	-0.176475	-0.334099
0.051166	0.012180	0.378671	0.115718	-0.150634	-0.269896	0.018869	0.038143	0.378420	-0.126695	-0.311824	0.040395
0.020105	-0.123057	0.517883	-0.315778	-0.250020	-0.301750	0.184652	0.309584	0.312660	-0.278153	-0.196134	0.154916
0.045178	-0.209458	0.444337	-0.523109	-0.338662	-0.323582	0.290633	0.188293	0.133144	0.030064	-0.040369	-0.088682
0.089340	-0.105025	0.211317	-0.304705	-0.256160	-0.277054	0.255810	-0.044440	0.006169	0.359606	-0.043393	-0.292199
0.108801	0.037729	-0.010434	0.074847	-0.014794	-0.138901	0.052934	0.005485	0.061337	0.356955	-0.098592	-0.176598
0.107678	0.027958	-0.152595	0.190202	0.100744	0.056895	-0.236145	-0.003149	0.263529	0.070591	0.000841	0.065470
0.112543	-0.080232	-0.271500	0.006865	-0.053934	0.231260	-0.401487	-0.177323	0.386356	-0.138055	0.199780	0.111877
0.104684	-0.100893	-0.381402	-0.139756	-0.207426	0.308954	-0.320897	-0.246016	0.242743	-0.093374	0.248570	-0.071473
0.022724	0.012556	-0.411410	-0.045827	-0.121471	0.263125	-0.138529	-0.109380	-0.078833	-0.115336	0.074969	-0.212139
-0.132158	0.138443	-0.323638	0.113426	0.028958	0.134231	-0.061722	-0.066587	-0.331194	-0.230822	-0.127703	-0.072969
-0.247759	0.170762	-0.174350	0.048873	0.007846	0.002116	-0.080640	-0.000521	-0.382195	-0.188414	-0.173828	0.226772
-0.215211	0.117022	-0.053945	-0.253922	-0.118017	-0.059802	-0.055290	0.209321	-0.262059	-0.103219	-0.073261	0.354766
-0.077164	0.037729	-0.023563	-0.478435	-0.166367	-0.021506	0.035901	0.258138	-0.071655	-0.090724	0.059840	0.252970
0.011501	-0.018248	-0.114335	-0.332196	-0.090389	0.085180	0.096840	0.139870	0.041685	-0.093374	0.130945	0.164272
-0.038630	-0.011486	-0.297006	0.087834	0.061588	0.187221	0.084349	-0.029800	-0.014610	-0.005908	0.088585	0.162401
-0.168447	0.066290	-0.444793	0.362471	0.186732	0.211567	0.037037	-0.273794	-0.128701	0.109228	-0.031295	0.110006
-0.252622	0.130175	-0.424163	0.220760	0.157941	0.127429	-0.004968	-0.330476	-0.104523	0.039909	-0.078554	0.073703
-0.205484	0.062156	-0.262122	-0.164575	-0.009805	-0.038328	-0.023508	-0.111632	0.056802	-0.170618	0.038282	0.219287
-0.044242	-0.117797	-0.135716	-0.415434	-0.143343	-0.216567	0.001842	0.074179	0.189455	-0.231958	0.183517	0.363000
0.108801	-0.229743	-0.154095	-0.339069	-0.152169	-0.339330	0.076022	0.068548	0.215910	-0.273231	0.195620	0.214048
0.121151	-0.164379	-0.219737	-0.019481	-0.127994	-0.373331	0.143017	-0.216362	0.160733	-0.456873	0.176709	-0.089804
-0.010572	-0.002470	-0.161972	0.291043	-0.177879	-0.332888	0.110088	-0.404800	0.027325	-0.467475	0.320431	-0.208772
-0.145626	0.132430	0.024825	0.318545	-0.305277	-0.264169	-0.014806	-0.276797	-0.147212	-0.135025	0.540551	-0.117114
-0.149367	0.182411	0.150153	0.037414	-0.449943	-0.219072	-0.072316	-0.089485	-0.228814	0.321349	0.557193	0.033658
-0.023292	0.077939	0.073981	-0.190921	-0.525922	-0.233389	0.045742	0.065545	-0.138901	0.476273	0.303033	0.215919
0.127888	-0.198188	-0.054320	-0.057664	-0.467211	-0.312129	0.196764	0.186791	0.038661	0.214531	-0.008989	0.363748
0.209100	-0.416069	0.035707	0.202807	-0.312952	-0.425586	0.161564	0.113593	0.181897	-0.110792	-0.208611	0.291518
0.163067	-0.275198	0.333268	0.149331	-0.187856	-0.514348	-0.019724	-0.049320	0.255215	-0.209618	-0.326947	0.036652
-0.014687	0.111385	0.526138	-0.177939	-0.152553	-0.511842	-0.093126	0.040770	0.261262	-0.052481	-0.398403	-0.086063
-0.189771	0.263208	0.417320	-0.332960	-0.131831	-0.381563	0.032873	0.246497	0.179629	0.088394	-0.301616	0.050125
-0.135151	0.004667	0.140022	-0.147393	-0.025538	-0.144627	0.155508	0.231852	-0.007809	0.060364	0.063244	0.210679
0.164190	-0.277076	-0.080952	0.082868	0.148728	0.122774	0.053312	0.110590	-0.245815	0.104682	0.568918	0.221907
0.368157	-0.208706	-0.166849	0.096619	0.283853	0.325065	-0.226686	-0.056076	-0.402974	0.304682	0.968313	0.220410
0.173921	0.095226	-0.141342	0.004574	0.324928	0.405982	-0.429864	-0.330100	-0.397685	0.440288	1.086392	0.340919
-0.238780	0.323336	-0.041942	0.023665	0.304582	0.380203	-0.384461	-0.346992	-0.306260	0.431197	0.855604	0.469661
-0.400022	0.370310	0.072855	0.125267	0.237788	0.318263	-0.184310	0.145875	-0.228436	0.209985	0.349175	0.456188
-0.120561	0.257947	0.129516	0.137872	0.072337	0.292842	-0.053398	0.586715	-0.113967	-0.146763	-0.176096	0.306113
0.328861	0.002037	0.099497	0.024428	-0.161762	0.327214	-0.069289	0.366662	0.119916	-0.136919	-0.487250	0.065470
0.554160	-0.243267	0.015072	-0.134411	-0.244648	0.383784	-0.104098	-0.163058	0.355366	0.270212	-0.605964	-0.242816
0.402214	-0.240262	-0.080202	-0.235594	-0.007887	0.405266	-0.039777	-0.281302	0.360657	0.318319	-0.643771	-0.500953
0.041435	-0.011862	-0.177351	-0.155793	0.362548	0.362659	0.077158	-0.002773	0.098752	-0.208104	-0.551900	-0.529011
-0.212218	0.157233	-0.265498	0.097765	0.505734	0.274940	0.131284	0.122602	-0.208791	-0.576525	-0.281201	-0.313523
-0.179670	0.139194	-0.281627	0.281875	0.361780	0.185073	0.090784	0.049404	-0.327039	-0.406135	-0.053601	-0.061746
0.019357	0.107252	-0.153345	0.243678	0.183661	0.127429	0.022654	-0.127398	-0.218236	-0.191443	-0.148875	0.041892
0.106555	0.209469	0.081485	0.133671	0.122241	0.109527	0.004869	-0.346242	-0.016498	-0.166453	-0.464943	0.013076
-0.031522	0.355654	0.259722	0.055367	0.112644	0.117761	0.061261	-0.138284	0.133522	-0.226657	-0.621087	-0.075962
-0.209599	0.377075	0.239459	-0.084010	0.109957	0.136379	0.157022	0.320474	0.191723	-0.303144	-0.494055	-0.266759
-0.180044	0.209469	0.068352	-0.198557	0.147193	0.152133	0.221745	0.365160	0.202683	-0.074821	-0.310690	-0.551084
0.062019	-0.082110	-0.040067	-0.059191	0.217442	0.150701	0.187680	-0.047443	0.212887	0.278167	-0.199159	-0.694743
0.281705	-0.329292	0.057846	0.204335	0.281550	0.112749	0.054069	-0.307202	0.219690	0.155819	-0.045284	-0.530508
0.278711	-0.364604	0.246964	0.228017	0.313028	0.027536	-0.057182	-0.121767	0.210619	-0.187657	0.163471	-0.276486
0.085971	-0.191051	0.288615	0.047345	0.266579	-0.091656	-0.005347	-0.098869	0.200037	-0.149414	0.261807	-0.239823
-0.096243	0.006921	0.138521	0.030538	0.129918	-0.204398	0.164213	-0.212233	0.179629	0.067182	0.213018	-0.390216
-0.113453	0.089589	0.014697	0.239477	-0.015561	-0.261306	0.234993	0.136491	0.097240	-0.024840	0.112412	-0.501327
-0.012068	0.094850	0.106251	0.364381	-0.111110	-0.230525	0.117658	0.385438	-0.034254	-0.303144	-0.034698	-0.462045
0.036570	0.091844	0.343774	0.253227	-0.193612	-0.116710	-0.018211	0.153008	-0.089411	-0.336085	-0.219953	-0.236082
-0.029278	0.054264	0.520885	0.081341	-0.255392	0.044006	-0.009887	0.122978	-0.015743	-0.063840	-0.286872	0.163898
-0.085768	-0.029893	0.529516	0.002664	-0.181333	0.203691	0.063910	0.318221	0.034504	0.308470	-0.131484	0.518314
-0.032645	-0.080232	0.392180	0.020610	0.065043	0.329720	0.051420	0.213452	-0.092811	0.427031	0.103335	0.528793
0.056780	-0.055814	0.165163	0.177215	0.319553	0.412785	-0.024643	-0.096617	-0.311172	0.064152	0.193350	0.220784
0.067259	-0.024634	-0.058071	0.436574	0.387116	0.452527	-0.043939	-0.265161	-0.399196	-0.402727	0.082912	-0.029572
0.015242	-0.019751	-0.144343	0.461020	0.289611	0.446440	-0.007617	-0.194965	-0.288127	-0.406135	-0.067590	0.049003
-0.002342	0.014810	-0.059947	0.054221	0.238555	0.390228	-0.003455	-0.128899	-0.143812	0.268319	-0.072505	0.276173
0.043307	0.080946	0.046964	-0.340596	0.361396	0.293558	-0.033345	-0.222743	-0.167613	0.920591	0.015589	0.258209
0.081855	0.102366	0.018073	-0.221085	0.518786	0.190085	-0.043939	-0.115010	-0.366328	0.706197	-0.005208	-0.068480
0.035073	0.082825	-0.095206	0.189056	0.464275	0.122058	-0.069289	0.321600	-0.537843	0.045212	-0.107287	-0.335596
-0.071926	0.110634	-0.101207	0.360561	0.161012	0.111317	-0.173716	0.418859	-0.484198	-0.245968	-0.102751	-0.266385
-0.113827	0.183163	0.070228	0.255519	-0.136820	0.139602	-0.277386	-0.054575	-0.214836	-0.223249	-0.096323	-0.041544
-0.020299	0.180156	0.266476	0.111516	-0.147948	0.163232	-0.212308	-0.408179	0.071919	-0.285347	-0.350009	0.034407
0.114789	0.066290	0.274356	-0.048118	0.093066	0.153565	0.028710	-0.213359	0.174716	-0.408407	-0.701616	-0.072595
0.160073	-0.023507	0.056720	-0.180230	0.257749	0.116329	0.227801	0.344507	0.075321	-0.471262	-0.729216	-0.266011
0.123022	0.023826	-0.181852	-0.071028	0.144506	0.078019	0.179732	0.396704	-0.059944	-0.424688	-0.459272	-0.524522
0.105058	0.112137	-0.191230	0.207391	-0.055469	0.055463	-0.078748	-0.223869	-0.073922	-0.036956	-0.294811	-0.729909
0.130882	0.092595	0.031579	0.243678	-0.047411	0.043290	-0.312195	-0.447968	0.024302	0.365288	-0.338289	-0.640871
0.134624	0.012180	0.210566	-0.046591	0.146809	0.028252	-0.330356	-0.072218	0.148639	0.109228	-0.374206	-0.283220
0.094579	0.008048	0.149028	-0.231013	0.249304	0.011424	-0.146474	0.266024	0.269576	-0.561379	-0.342826	-0.052767
0.065388	0.046372	0.003444	-0.038191	0.124160	0.012856	0.084728	0.294939	0.375396	-0.758274	-0.325435	-0.197548
0.057154	0.029461	0.034956	0.241005	-0.062376	0.057969	0.225909	0.035140	0.395427	-0.273988	-0.269480	-0.505442
-0.001967	0.057270	0.207189	0.232219	-0.098447	0.157504	0.243320	-0.130401	0.274867	0.165288	-0.110690	-0.643489
-0.124676	0.245921	0.266476	0.017556	0.047001	0.296780	0.208498	0.168023	0.063605	0.052031	0.095771	-0.488233
-0.171814	0.389476	0.117508	-0.036282	0.292298	0.437131	0.218717	0.332866	-0.140035	-0.251269	0.362791	-0.073343
-0.017680	0.197067	-0.104958	0.171486	0.524544	0.535234	0.268680	-0.190836	-0.288504	-0.175162	0.733819	0.453943
0.240163	-0.212463	-0.235116	0.308995	0.562932	0.561012	0.229315	-0.548194	-0.376151	0.399758	1.007643	0.812850
0.370777	-0.419450	-0.176976	0.059186	0.314179	0.506233	0.045742	-0.015911	-0.384084	0.967940	0.882458	0.819587
0.282453	-0.269187	0.052217	-0.371906	0.015139	0.381993	-0.108260	0.600985	-0.285482	0.863016	0.383592	0.580440
0.090088	-0.018999	0.273606	-0.419252	-0.003282	0.219086	-0.023886	0.535645	-0.115856	0.217561	-0.150388	0.286652
-0.074919	0.067417	0.299872	0.081723	0.235484	0.064414	0.230451	0.195051	0.034504	-0.234609	-0.444906	0.002975
-0.192390	0.029837	0.162911	0.605405	0.428191	-0.028306	0.366711	0.003608	0.114625	-0.136161	-0.467212	-0.218125
-0.276191	0.055016	0.059347	0.618392	0.406310	-0.025443	0.252782	-0.179200	0.124451	0.334228	-0.343582	-0.277608
-0.291156	0.152723	0.113756	0.233747	0.241243	0.060833	0.062396	-0.153299	0.034504	0.644455	-0.198403	-0.188196
-0.203613	0.130175	0.287489	-0.105392	0.110724	0.175405	-0.020103	0.085440	-0.178946	0.519834	-0.031295	-0.089430
-0.052098	-0.087745	0.410566	-0.245522	0.151415	0.260261	-0.072694	0.041897	-0.388240	0.276273	0.165362	-0.061372
0.077738	-0.279330	0.306251	-0.257740	0.299592	0.285681	-0.264900	-0.125896	-0.365573	0.246728	0.203562	-0.059501
0.118531	-0.233875	0.031954	-0.114174	0.371377	0.260977	-0.507428	-0.020416	-0.055410	0.234228	-0.098214	-0.018349
0.050043	-0.061449	-0.116961	0.135580	0.359477	0.211567	-0.495698	0.056912	0.319085	-0.108142	-0.538667	0.039272
-0.077538	0.024201	-0.008184	0.204717	0.392106	0.157862	-0.139285	0.011866	0.471390	-0.418251	-0.719386	-0.022838
-0.144504	0.050882	0.115632	-0.012990	0.423968	0.106304	0.247105	-0.002398	0.339115	-0.289134	-0.574206	-0.291450
-0.067437	0.139946	0.008695	-0.177939	0.326847	0.050092	0.304259	-0.129650	0.124829	-0.055131	-0.351900	-0.544724
0.093456	0.200825	-0.213360	-0.022154	0.147193	-0.021506	0.062396	-0.243389	0.048488	-0.063083	-0.166645	-0.414907
0.198995	0.106500	-0.266624	0.187147	-0.035515	-0.108478	-0.143826	-0.114260	0.110468	-0.191065	0.043199	0.040395
0.195253	-0.002470	-0.101207	0.064534	-0.256160	-0.193661	-0.132853	0.048278	0.173204	-0.212269	0.221338	0.280290
0.140612	0.063283	0.045463	-0.216121	-0.456851	-0.244484	-0.035237	0.069674	0.215154	-0.007043	0.228903	0.029916
0.097199	0.180532	-0.022437	-0.099665	-0.481409	-0.230525	0.001464	-0.084980	0.313794	0.174000	0.105226	-0.333725
0.068382	0.134309	-0.188979	0.465985	-0.407733	-0.150712	0.029845	-0.088359	0.434353	0.009238	-0.000671	-0.410792
0.040313	0.025704	-0.178852	0.786077	-0.474502	-0.049423	0.134312	0.271281	0.471390	-0.246725	-0.049442	-0.278731
0.012623	0.076060	0.048465	0.407162	-0.630297	0.003548	0.241049	0.470305	0.437754	-0.209997	-0.033563	-0.111129
-0.001967	0.213978	0.239835	-0.119901	-0.581563	-0.042981	0.235371	0.181536	0.381821	-0.089588	0.155529	0.162401
0.008134	0.219240	0.206063	-0.052318	-0.306428	-0.176481	0.140746	-0.059455	0.235563	-0.161530	0.544334	0.551622
0.034325	0.106124	0.068727	0.410600	-0.076191	-0.329309	0.068831	0.011116	-0.047477	-0.072170	0.906285	0.821458
0.042558	0.044117	0.060472	0.517933	0.028958	-0.420934	0.066560	0.071176	-0.331950	0.472106	0.988736	0.818464
0.014868	0.067041	0.197433	0.113808	0.187116	-0.406975	0.090405	-0.141287	-0.442263	0.783091	0.816270	0.663149
-0.019925	0.101239	0.268728	-0.291723	0.397865	-0.298170	0.091541	-0.341737	-0.360284	0.316803	0.598797	0.558359
-0.018802	0.108755	0.147151	-0.303559	0.417826	-0.151070	0.064667	-0.160055	-0.177813	-0.209618	0.431247	0.615245
0.028711	0.073805	-0.008184	-0.040864	0.177135	-0.037254	0.009409	0.077182	0.025814	-0.058918	0.292064	0.793389
0.104684	0.005418	0.025951	0.074847	-0.091540	-0.001821	-0.082532	0.110966	0.178117	0.192182	0.239114	0.887326
0.175043	-0.029518	0.207189	-0.171830	-0.184402	-0.040475	-0.163122	0.044900	0.181897	-0.159259	0.361278	0.739871
0.201615	-0.025761	0.287489	-0.460108	-0.136052	-0.097741	-0.137394	0.023503	-0.001009	-0.450058	0.578751	0.512700
0.179160	-0.095634	0.162536	-0.353197	-0.087319	-0.104541	-0.020481	0.029134	-0.259793	0.154303	0.708479	0.502595
0.151840	-0.265431	-0.022813	0.020992	-0.102284	-0.029022	0.019247	-0.101122	-0.402974	0.911879	0.705831	0.704317
0.149594	-0.367985	-0.098206	0.166902	-0.120320	0.098785	-0.107125	-0.258779	-0.330817	0.825137	0.673683	0.836428
0.123397	-0.265806	-0.059947	-0.028645	-0.045876	0.203333	-0.235767	-0.254275	-0.084122	0.439531	0.649856	0.740619
0.017112	-0.058819	-0.030314	-0.232540	0.107653	0.218370	-0.161987	0.150005	0.237830	0.391803	0.516724	0.470036
-0.108215	0.065162	-0.096331	-0.213830	0.197865	0.132441	0.062018	0.412100	0.524678	0.290667	0.167632	0.097281
-0.138892	0.071551	-0.209609	-0.086301	0.136444	-0.001463	0.184274	0.159764	0.649395	0.020598	-0.256626	-0.258529
-0.085768	0.056519	-0.263248	-0.100810	0.034717	-0.099530	0.083971	0.005110	0.547354	-0.096025	-0.424112	-0.373755
-0.064070	0.060653	-0.249369	-0.312341	0.047385	-0.096309	-0.087450	0.063668	0.308881	-0.138433	-0.183658	-0.200167
-0.097366	0.037729	-0.255746	-0.434144	0.103047	0.012498	-0.128313	0.064044	0.100264	-0.212647	0.222473	-0.006377
-0.106344	-0.005476	-0.307884	-0.185575	0.000555	0.164306	-0.030318	0.035890	0.000880	-0.098675	0.412715	-0.006377
-0.091380	0.011053	-0.321762	0.227254	-0.217787	0.265631	0.066560	0.001356	0.008058	0.368697	0.237601	-0.096912
-0.144504	0.097105	-0.248244	0.325420	-0.275730	0.252742	0.075265	0.046401	0.141080	0.772485	-0.155303	-0.116366
-0.251874	0.135061	-0.164223	0.059950	-0.101900	0.134231	0.027574	0.309584	0.384089	0.532712	-0.509178	-0.084941
-0.261601	0.047500	-0.174350	-0.096228	0.040859	-0.016853	-0.018967	0.523253	0.571919	-0.187657	-0.663431	-0.095416
-0.116445	-0.068211	-0.259497	0.160027	-0.057772	-0.115636	-0.036750	0.465048	0.553023	-0.746158	-0.603696	-0.173231
0.025717	-0.064454	-0.259497	0.490814	-0.297986	-0.128521	-0.005725	0.206317	0.410544	-0.660963	-0.337533	-0.236456
0.003270	0.027582	-0.047194	0.355214	-0.416175	-0.090941	0.069209	-0.169064	0.308881	-0.093374	0.153638	-0.121604
-0.097740	0.020069	0.247339	-0.207339	-0.251555	-0.066961	0.136961	-0.232878	0.198525	0.280440	0.733063	0.193090
-0.056588	-0.137332	0.310003	-0.560146	0.047385	-0.095951	0.161942	0.125605	-0.061833	0.096728	1.063031	0.465545
0.137244	-0.229743	0.051467	-0.289050	0.139515	-0.163596	0.177082	0.208195	-0.377284	-0.167210	0.964530	0.544512
0.237543	-0.078729	-0.197606	0.243678	-0.030910	-0.228378	0.194872	-0.224995	-0.480420	-0.106248	0.657798	0.602895
0.100193	0.158360	-0.101582	0.360179	-0.105738	-0.261306	0.143017	-0.565836	-0.287749	0.049000	0.430491	0.710679
-0.082027	0.210972	0.207564	-0.085155	0.115331	-0.264527	0.016220	-0.268164	0.028458	0.142940	0.262942	0.592416
-0.034141	0.076436	0.322011	-0.553655	0.350264	-0.262379	-0.018967	0.355397	0.277135	0.133470	0.008403	0.172880
0.209474	-0.053184	0.122761	-0.528072	0.308805	-0.275980	0.159671	0.489081	0.386734	-0.027112	-0.253223	-0.139561
0.343831	-0.096009	-0.105333	-0.148920	0.084621	-0.308192	0.379580	0.058413	0.350075	-0.164181	-0.287250	-0.024709
0.201989	-0.049803	-0.101957	0.085924	-0.103435	-0.347920	0.353085	-0.274170	0.189455	-0.033927	-0.018441	0.334557
-0.027033	0.116647	0.070979	0.041616	-0.221624	-0.384069	0.088891	-0.350746	-0.031610	0.130061	0.372624	0.565095
-0.052098	0.267718	0.194056	-0.059573	-0.342115	-0.415565	-0.088207	-0.168314	-0.250348	-0.017645	0.593880	0.458434
0.170927	0.111385	0.173043	-0.132502	-0.468746	-0.445987	0.024168	0.280669	-0.410152	-0.150550	0.492140	0.081937
0.421301	-0.314642	0.067227	-0.224140	-0.525538	-0.472473	0.225530	0.345633	-0.400707	0.234228	0.217934	-0.218499
0.459100	-0.521629	-0.038567	-0.254686	-0.494072	-0.482494	0.191844	0.000605	-0.146079	0.588394	0.031474	-0.155648
0.229684	-0.241013	-0.091455	-0.170302	-0.495223	-0.464598	-0.091612	-0.127773	0.210997	0.224758	-0.027514	0.084182
-0.096618	0.158736	-0.080202	-0.053082	-0.576191	-0.418786	-0.334518	-0.066962	0.410922	-0.242560	-0.082713	0.109631
-0.269083	0.232768	-0.057321	0.078667	-0.548946	-0.352573	-0.328843	-0.102623	0.386356	-0.044908	-0.156059	-0.098035
-0.218952	0.074557	-0.097831	0.226872	-0.308731	-0.268106	-0.161230	-0.051572	0.278646	0.282712	-0.224490	-0.299681
-0.132906	0.026831	-0.205858	0.257811	-0.094610	-0.164670	-0.046209	0.006987	0.177362	0.172864	-0.312958	-0.432116
-0.190520	0.098608	-0.294756	0.130997	-0.128762	-0.051213	-0.080261	0.100831	0.055290	0.038016	-0.345851	-0.542853
-0.316969	0.075684	-0.270749	0.019465	-0.268439	0.046870	-0.192255	0.234856	-0.094322	0.066046	-0.232807	-0.612438
-0.317717	-0.019751	-0.132340	-0.046591	-0.283021	0.100934	-0.234631	0.062918	-0.240148	-0.093753	-0.175340	-0.624784
-0.159842	0.006921	-0.009309	-0.218030	-0.173658	0.101292	-0.109017	-0.102998	-0.345550	-0.310338	-0.388195	-0.508061
0.013745	0.096353	-0.065948	-0.402070	-0.050097	0.066204	0.126363	-0.049695	-0.340639	-0.274367	-0.624112	-0.142554
0.096076	0.006545	-0.307134	-0.317305	0.024736	0.031116	0.267165	0.317470	-0.192169	-0.164938	-0.562108	0.253718
0.111421	-0.205701	-0.546818	-0.009554	0.004776	0.024314	0.164970	0.699745	-0.005165	-0.108520	-0.400671	0.201323
0.097573	-0.204950	-0.600832	0.152387	-0.112645	0.046512	-0.068532	0.288179	0.082879	-0.017267	-0.452467	-0.228974
0.019357	0.040359	-0.444418	0.003428	-0.214717	0.067994	-0.165770	-0.426947	0.056424	-0.071792	-0.519764	-0.366273
-0.121309	0.148965	-0.184478	-0.243613	-0.165983	0.052241	-0.028805	-0.398419	-0.034632	-0.363348	-0.297080	-0.016104
-0.178548	-0.055814	0.023699	-0.332578	-0.006735	-0.009695	0.165349	-0.039935	-0.167235	-0.554185	0.027314	0.245859
-0.037508	-0.241764	0.073981	-0.241704	0.035484	-0.089151	0.219853	-0.166437	-0.282838	-0.261493	0.114682	0.085305
0.151091	-0.134702	0.006070	-0.089355	-0.136820	-0.141406	0.131284	-0.464110	-0.282082	0.204303	0.028827	-0.150036
0.122648	0.045621	-0.041192	0.068354	-0.271125	-0.147132	0.010923	-0.321842	-0.160435	0.288015	0.041686	-0.203534
-0.113453	0.018566	0.005695	0.224962	-0.119552	-0.128879	-0.065505	0.122227	-0.021410	0.097106	0.166119	-0.294443
-0.273198	-0.077978	0.100998	0.273090	0.141818	-0.132100	-0.071181	0.263395	0.067006	0.053925	0.178222	-0.543976
-0.215211	-0.020126	0.176795	0.094710	0.197097	-0.186145	-0.003076	-0.045566	0.121050	0.098243	-0.018063	-0.650972
-0.107093	0.059149	0.216195	-0.156557	0.070033	-0.275264	0.090784	-0.181827	0.151284	-0.153200	-0.227136	-0.370762
-0.105596	-0.043793	0.227076	-0.153884	-0.046643	-0.345057	0.139232	0.025755	0.136923	-0.566301	-0.208233	0.065470
-0.119438	-0.194056	0.228577	0.103495	-0.130680	-0.340762	0.133176	0.168398	0.072675	-0.556835	-0.049442	0.213673
-0.031148	-0.170765	0.241335	0.224580	-0.178263	-0.246274	0.125606	0.101206	-0.020276	-0.070277	-0.069102	-0.013486
0.069504	-0.058443	0.228202	0.041234	-0.078493	-0.089867	0.136583	0.029509	-0.119256	0.308470	-0.304641	-0.238701
0.060148	-0.056189	0.098371	-0.122192	0.118402	0.077661	0.114251	-0.148419	-0.192547	0.193319	-0.428270	-0.132827
0.014119	-0.138834	-0.118837	-0.015663	0.164851	0.210851	0.017355	-0.407052	-0.198213	-0.252405	-0.269102	0.147431
0.049669	-0.156114	-0.217861	0.146658	-0.018631	0.284249	-0.104476	-0.289935	-0.110945	-0.532602	-0.059272	0.203569
0.114415	-0.071967	-0.093705	0.114954	-0.223543	0.292484	-0.165392	-0.036932	0.047732	-0.398940	-0.029027	-0.041918
0.101690	0.056143	0.080735	-0.030173	-0.236206	0.252384	-0.163122	0.039644	0.199659	-0.144113	-0.082335	-0.258903
0.046675	0.156857	0.132893	-0.135938	-0.033213	0.198678	-0.165014	0.072302	0.223469	-0.069141	0.009538	-0.158641
0.049669	0.145959	0.100247	-0.188630	0.242394	0.176480	-0.186580	0.136491	0.037906	-0.003636	0.317405	0.125350
0.120028	0.021947	0.021824	-0.153502	0.367154	0.217296	-0.171824	0.002857	-0.282838	0.216046	0.689190	0.233883
0.186271	-0.062200	-0.137216	0.006865	0.224352	0.312176	-0.106368	-0.179575	-0.528021	0.326652	0.856361	0.116368
0.172049	0.038480	-0.255371	0.153151	0.010532	0.405982	-0.051885	-0.068088	-0.537088	0.136122	0.654016	0.083434
0.050043	0.255692	-0.173600	0.113044	0.071569	0.433909	-0.037885	0.083563	-0.331572	-0.067627	0.178600	0.247730
-0.116445	0.385342	-0.050945	-0.035900	0.419745	0.369462	-0.024264	-0.100746	-0.044077	-0.066112	-0.323166	0.303868
-0.201743	0.328221	-0.139467	-0.033609	0.647385	0.251668	0.002977	-0.347743	0.176983	-0.077471	-0.671749	0.037775
-0.135151	0.174519	-0.276751	0.199752	0.453910	0.154281	-0.002698	-0.190461	0.185676	-0.295192	-0.808233	-0.370014
0.026465	0.066665	-0.110960	0.391119	0.019362	0.127787	-0.055668	0.111341	-0.059944	-0.478835	-0.751900	-0.679778
0.140612	0.024953	0.288240	0.229545	-0.245799	0.163232	-0.104855	0.119975	-0.360284	-0.349338	-0.594244	-0.772932
0.111421	-0.035528	0.502499	-0.151211	-0.128762	0.207271	-0.127556	0.085815	-0.442641	-0.035063	-0.415038	-0.505442
0.010752	-0.143342	0.365538	-0.272250	0.234333	0.210493	-0.157825	0.219460	-0.310794	0.183849	-0.211635	0.066592
0.001400	-0.237256	0.099497	0.014501	0.484237	0.161084	-0.183175	0.260767	-0.211814	0.055819	-0.036966	0.430365
0.089714	-0.276325	-0.041192	0.330768	0.396713	0.084106	-0.116962	-0.026046	-0.243926	-0.420902	-0.064565	0.190844
0.089714	-0.217722	0.011696	0.363999	0.152183	0.015005	0.079429	-0.478374	-0.254126	-0.675730	-0.296323	-0.274990
-0.076041	0.008799	0.192930	0.203953	0.065811	-0.023296	0.296310	-0.555701	-0.138523	-0.319804	-0.416550	-0.383108
-0.212592	0.297406	0.377170	0.020992	0.158709	-0.025443	0.350814	-0.054200	0.008058	0.266046	-0.243015	-0.263018
-0.125798	0.324087	0.424075	-0.127538	0.230494	-0.000389	0.173297	0.342254	0.074943	0.591803	-0.057382	-0.407051
0.099444	-0.004724	0.295369	-0.184812	0.180590	0.037203	-0.093504	0.317470	0.073431	0.620591	-0.139424	-0.710455
0.225941	-0.307504	0.125763	-0.182521	0.077711	0.073723	-0.230470	0.061416	0.071541	0.336879	-0.298214	-0.664814
0.171675	-0.251156	0.077358	-0.263849	0.098056	0.101292	-0.176364	-0.187458	0.101020	-0.142220	-0.253979	-0.302300
0.062393	-0.023132	0.117133	-0.363888	0.353335	0.116329	-0.055290	-0.036182	0.128987	-0.471640	-0.145851	-0.187822
0.030582	0.028334	0.058221	-0.220703	0.629726	0.116687	0.031359	0.282922	0.100642	-0.446271	-0.248686	-0.532752
0.075867	-0.078729	-0.132715	0.111516	0.558709	0.096995	0.101382	0.235232	0.041685	-0.024082	-0.476285	-0.907986
0.114040	-0.094507	-0.252745	0.216176	0.174064	0.050092	0.171405	-0.080100	0.034126	0.432334	-0.558327	-0.874690
0.076989	0.025328	-0.178101	-0.014518	-0.140657	-0.028664	0.167241	-0.100371	0.037906	0.345591	-0.467590	-0.472520
-0.029278	0.101615	-0.044568	-0.141284	-0.250788	-0.130669	0.028331	0.093323	-0.088278	-0.155472	-0.360596	-0.019471
-0.128043	0.038480	0.012071	0.136344	-0.318708	-0.235178	-0.163879	0.084689	-0.315327	-0.290270	-0.275529	0.286278
-0.156850	-0.037031	0.055219	0.451852	-0.381256	-0.312487	-0.253171	-0.041061	-0.429041	-0.012344	-0.160218	0.391443
-0.139266	0.026831	0.138896	0.308613	-0.392768	-0.334319	-0.194147	0.079059	-0.351595	-0.103598	-0.086494	0.225649
-0.117942	0.165500	0.139272	-0.081337	-0.459537	-0.287075	-0.083288	0.208946	-0.208414	-0.459145	-0.184792	-0.191937
-0.070804	0.185042	-0.057321	-0.037809	-0.612645	-0.182923	0.008653	0.153008	-0.066744	-0.296328	-0.394244	-0.560811
0.005515	0.101615	-0.352520	0.515642	-0.629145	-0.057297	0.106681	0.201060	0.091949	0.194455	-0.467590	-0.556695
0.001400	0.175271	-0.522437	0.891883	-0.397372	0.050808	0.182381	0.001731	0.176228	0.253167	-0.285737	-0.244687
-0.153482	0.461254	-0.429789	0.698224	-0.163681	0.113465	0.125985	-0.522668	0.050377	-0.146763	-0.004074	0.073329
-0.305372	0.604057	-0.130840	0.303648	-0.177112	0.127070	-0.056047	-0.614260	-0.202747	-0.358804	0.174440	0.281413
-0.230924	0.345884	0.171917	0.059950	-0.324464	0.103440	-0.191877	-0.247518	-0.326283	-0.221356	0.220582	0.412027
0.053411	-0.024259	0.290866	-0.119138	-0.306812	0.060833	-0.165770	-0.043689	-0.206147	-0.149035	0.205453	0.384706
0.302663	-0.107655	0.211692	-0.221467	-0.030910	0.015005	-0.039399	-0.177323	-0.008187	-0.133132	0.177087	0.121233
0.360672	-0.010359	0.087114	-0.052318	0.304582	-0.027591	0.084728	-0.184079	0.046598	0.217940	0.182004	-0.227851
0.302289	-0.058819	0.062348	0.160027	0.440475	-0.066961	0.166106	0.157512	-0.041810	0.669455	0.251595	-0.417526
0.268232	-0.163252	0.134769	-0.055755	0.330686	-0.107762	0.183138	0.300947	-0.093567	0.450894	0.283365	-0.361409
0.289190	-0.033650	0.200060	-0.510890	0.190571	-0.150354	0.130526	0.043398	-0.018765	-0.147521	0.096905	-0.145547
0.307154	0.192934	0.201185	-0.500199	0.216291	-0.182923	0.082457	-0.133028	0.111224	-0.263386	-0.283091	0.111877
0.271974	0.188048	0.180923	0.040852	0.308421	-0.179702	0.125606	-0.187833	0.216288	-0.026733	-0.534130	0.303119
0.171675	0.069296	0.206439	0.348720	0.262356	-0.115279	0.203199	-0.129650	0.255971	0.149379	-0.395000	0.286278
0.028337	0.143704	0.296495	-0.003827	0.127615	0.017869	0.151723	0.254383	0.186054	0.285364	-0.028270	-0.022838
-0.073423	0.251934	0.387677	-0.501345	0.089995	0.205123	-0.051128	0.419235	0.035260	0.284228	0.168388	-0.434735
-0.010946	0.046372	0.347902	-0.512036	0.126463	0.412785	-0.225929	0.066671	-0.049366	0.026656	0.067027	-0.532752
0.213217	-0.309007	0.107752	-0.098519	0.117634	0.591088	-0.242577	-0.170941	0.024302	-0.122530	-0.066834	-0.127964
0.382004	-0.374371	-0.202483	0.310905	0.119170	0.684894	-0.180148	-0.048569	0.163756	-0.029005	0.029961	0.455814
0.280956	-0.153109	-0.344268	0.511440	0.205542	0.653028	-0.149879	-0.049695	0.195502	0.037258	0.296981	0.707685
-0.022169	0.003916	-0.215986	0.477063	0.281166	0.490479	-0.126800	-0.223119	0.054535	0.161122	0.481172	0.462176
-0.256363	-0.005100	0.069103	0.213121	0.266195	0.245581	-0.057560	-0.034305	-0.144190	0.226273	0.465665	0.012702
-0.276565	-0.037782	0.325388	-0.099665	0.206310	0.009276	0.002599	0.398206	-0.201614	0.087637	0.341610	-0.233837
-0.177052	-0.077602	0.420322	-0.198557	0.150648	-0.121721	-0.016319	0.579205	-0.048610	0.127409	0.202428	-0.124223
-0.112704	-0.150104	0.312630	-0.080955	0.164083	-0.089867	-0.061722	0.415104	0.151284	0.181576	0.046603	0.203194
-0.150490	-0.092628	0.070604	0.079049	0.325312	0.094489	-0.037885	0.128984	0.188699	-0.111928	-0.081957	0.550874
-0.267961	0.166252	-0.155971	0.228399	0.504198	0.356215	0.041957	-0.127022	0.068896	-0.315639	-0.047174	0.786652
-0.364481	0.350769	-0.255746	0.313197	0.455446	0.594310	0.082078	-0.060956	-0.016876	-0.064219	0.168388	0.794137
-0.310235	0.222997	-0.234365	0.166902	0.243546	0.728216	0.048013	0.247624	0.043197	0.233849	0.387753	0.556862
-0.091754	-0.018999	-0.172100	-0.132502	0.160628	0.733945	0.005626	0.091446	0.154686	0.275137	0.494787	0.312850
0.118157	-0.068211	-0.139092	-0.214212	0.223968	0.643719	0.021897	-0.251647	0.159977	0.307334	0.580264	0.350649
0.134624	0.029837	-0.134215	-0.006881	0.238939	0.512319	0.075644	-0.048569	0.027703	0.341425	0.738358	0.611128
-0.003838	0.053512	-0.094456	0.095855	0.232030	0.380203	0.088891	0.125981	-0.132856	0.079303	0.888887	0.752970
-0.083524	-0.002846	-0.009684	-0.111119	0.352567	0.253100	0.049906	-0.201347	-0.202747	-0.134647	0.890022	0.648928
0.018235	-0.015994	0.002319	-0.304323	0.500360	0.112033	0.037037	-0.530551	-0.147212	0.227031	0.719447	0.534781
0.220328	-0.002095	-0.135341	-0.143956	0.446233	-0.064455	0.094947	-0.348119	0.015236	0.623622	0.494787	0.568090
0.368906	-0.050930	-0.269624	0.204335	0.181742	-0.279201	0.167241	0.372671	0.241987	0.481576	0.314379	0.529542
0.362543	-0.110284	-0.193105	0.261249	-0.110343	-0.511127	0.197143	0.819160	0.435487	0.233470	0.148343	0.226772
0.191136	-0.048676	0.049591	-0.104247	-0.298754	-0.714062	0.197521	0.514616	0.498601	0.331576	-0.018819	-0.068480
-0.034141	0.101239	0.248840	-0.392906	-0.392768	-0.835035	0.174433	-0.056827	0.457407	0.449000	-0.063431	-0.007874
-0.144504	0.144831	0.338896	-0.125629	-0.474502	-0.833245	0.107060	-0.257653	0.416968	0.117561	0.057193	0.199452
-0.115323	0.015185	0.401936	0.399522	-0.592307	-0.705830	0.030224	-0.031302	0.396938	-0.146763	0.160067	0.088299
-0.091754	-0.098639	0.453343	0.531684	-0.681716	-0.497168	0.032116	0.175906	0.370105	0.345212	0.135862	-0.297810
-0.142259	-0.036280	0.431204	0.266597	-0.614947	-0.282064	0.112737	0.079434	0.373129	0.891046	0.069296	-0.536868
-0.155353	0.070423	0.327264	0.109225	-0.350174	-0.131384	0.133176	0.017497	0.410922	0.464909	-0.054735	-0.511054
-0.055465	0.011429	0.195557	0.160409	-0.024003	-0.078414	-0.010644	0.271281	0.399962	-0.308823	-0.292164	-0.379367
0.081106	-0.141088	0.094994	0.110752	0.141051	-0.109552	-0.207011	0.371544	0.348185	-0.348959	-0.421087	-0.196052
0.166810	-0.138083	0.049966	-0.097756	0.073488	-0.170039	-0.236523	0.128984	0.353854	0.089909	-0.251711	-0.067732
0.187019	0.042990	0.001944	-0.222994	-0.071202	-0.196166	-0.052641	0.011866	0.352343	0.201273	-0.071749	-0.209894
0.136121	0.160615	-0.137591	-0.108447	-0.123006	-0.149996	0.153237	0.186041	0.183408	-0.024840	-0.171560	-0.444836
0.033950	0.084704	-0.307884	0.211211	-0.085784	-0.046202	0.188437	0.208946	-0.064855	-0.301250	-0.291408	-0.271997
-0.036012	-0.015618	-0.296631	0.503037	-0.071586	0.058327	0.050284	-0.108629	-0.134368	-0.704128	-0.114849	0.275799
-0.031896	0.051633	-0.027689	0.396467	-0.161379	0.105230	-0.115070	-0.342863	0.001635	-0.883227	0.141157	0.574452
-0.018428	0.206462	0.281861	-0.134793	-0.340197	0.081958	-0.152528	-0.198344	0.115003	-0.136919	0.136996	0.394437
-0.028529	0.235399	0.343774	-0.528454	-0.458386	0.032906	-0.005725	0.132362	0.057936	0.830440	-0.024490	0.167640
0.014119	0.118526	0.084487	-0.294777	-0.350174	0.030400	0.216446	0.303951	-0.117745	0.554682	-0.044906	0.176997
0.128262	0.050130	-0.315011	0.312815	-0.070051	0.116687	0.303880	0.109089	-0.285482	-0.396290	0.109008	0.226398
0.156705	0.149341	-0.579077	0.664610	0.151031	0.260977	0.173676	-0.228374	-0.327416	-0.547369	0.267480	0.202071
-0.020299	0.293272	-0.542693	0.506092	0.209381	0.372326	-0.001563	-0.319590	-0.208036	-0.156608	0.366194	0.289272
-0.226434	0.289890	-0.281252	0.072555	0.168306	0.359079	0.007518	-0.173944	-0.068255	-0.099054	0.480794	0.521308
-0.159842	0.127920	-0.019437	-0.263468	0.052759	0.196530	0.197900	0.012242	-0.101500	-0.208104	0.606361	0.622730
0.178412	-0.043417	0.118259	-0.293632	-0.115715	-0.048707	0.345515	0.183788	-0.271126	-0.060054	0.593502	0.461802
0.444504	-0.135078	0.183174	-0.135938	-0.204356	-0.250211	0.268301	0.272408	-0.316083	0.188016	0.415362	0.326697
0.397723	-0.187294	0.221073	-0.105010	-0.133366	-0.296023	0.011680	0.059539	-0.104145	0.310364	0.293955	0.513823
0.160073	-0.242891	0.186551	-0.251631	0.008230	-0.151070	-0.207768	-0.357878	0.187188	0.257712	0.364303	0.822581
-0.031148	-0.263928	0.090116	-0.266522	0.174064	0.120626	-0.211173	-0.298944	0.315684	0.032714	0.444485	0.769063
-0.126172	-0.205325	0.051842	-0.051173	0.419362	0.390944	-0.045074	0.052782	0.257860	-0.224764	0.375650	0.301622
-0.207355	-0.094131	0.119759	0.056512	0.655446	0.539172	0.068074	-0.042188	0.159221	-0.218706	0.304167	-0.101402
-0.282925	0.000910	0.200435	-0.103865	0.688843	0.514826	-0.001941	-0.214860	0.115381	-0.012344	0.356739	-0.138439
-0.257111	0.041863	0.228953	-0.237504	0.566770	0.356931	-0.145339	-0.119515	0.107067	0.145970	0.387375	-0.030695
-0.077164	0.047875	0.225576	-0.209630	0.523008	0.172183	-0.181283	0.029134	0.087036	0.299000	0.304924	-0.034436
0.160822	0.035098	0.153530	-0.282559	0.572145	0.076587	-0.078370	-0.075221	0.037150	0.331576	0.235710	-0.102524
0.293307	-0.029142	-0.058071	-0.492945	0.526079	0.130651	0.052555	-0.124395	-0.025943	0.074000	0.166875	-0.160885
0.268606	-0.156490	-0.307884	-0.486453	0.383661	0.302151	0.098354	0.158638	-0.046344	-0.106248	-0.101616	-0.229348
0.175418	-0.255664	-0.360772	-0.173357	0.309573	0.484750	0.034009	0.323854	0.024680	0.060364	-0.507287	-0.223736
0.103187	-0.213214	-0.164973	0.088216	0.275792	0.558506	-0.056803	0.289306	0.147127	0.133470	-0.708800	-0.090178
0.044055	-0.050930	0.046213	0.096237	0.100744	0.462552	-0.038642	0.411724	0.212509	-0.218706	-0.621087	-0.050149
-0.040127	0.067417	0.052217	0.064916	-0.168669	0.227321	0.136583	0.329862	0.168291	-0.402727	-0.518630	-0.283968
-0.115323	0.011053	-0.094456	0.194786	-0.285323	-0.042623	0.315614	-0.192713	0.047732	-0.092996	-0.557949	-0.545472
-0.114949	-0.129067	-0.181852	0.357506	-0.210880	-0.230168	0.258081	-0.194215	-0.094700	0.172106	-0.555303	-0.482996
-0.060703	-0.114792	-0.109834	0.318927	-0.182100	-0.278843	-0.055668	0.334744	-0.201236	0.211121	-0.305397	-0.178843
-0.071552	0.108003	0.018073	0.113808	-0.311801	-0.219072	-0.338680	0.353519	-0.200858	0.196349	0.085559	-0.006003
-0.200995	0.294775	0.043962	0.044671	-0.404280	-0.143553	-0.331869	-0.058704	-0.085256	0.027792	0.293955	-0.103646
-0.342035	0.262832	-0.055071	0.271180	-0.270742	-0.138901	-0.127178	-0.214860	0.033748	-0.019539	0.158176	-0.279479
-0.346898	0.151220	-0.141717	0.545053	-0.019782	-0.229810	0.010166	0.002482	0.022414	0.253546	-0.129972	-0.333725
-0.205110	0.111761	-0.083953	0.521371	0.106886	-0.368679	0.021897	0.189794	-0.132101	0.273622	-0.282335	-0.231218
-0.035637	0.029461	0.101373	0.203571	0.034333	-0.473546	0.060125	0.071927	-0.307016	-0.134268	-0.245284	-0.026954
0.064639	-0.171141	0.310754	-0.100047	-0.124924	-0.482494	0.181624	-0.289185	-0.355750	-0.450058	-0.159461	0.179242
0.094579	-0.274822	0.472855	-0.158848	-0.229683	-0.384785	0.238399	-0.501647	-0.239770	-0.369028	-0.108044	0.266068
0.077738	-0.118173	0.520885	-0.017572	-0.226229	-0.224083	0.097218	-0.279800	-0.059188	-0.068384	-0.050577	0.206937
0.012623	0.111385	0.383549	0.144366	-0.184786	-0.070540	-0.147609	0.115095	0.044708	0.128546	0.042443	0.074077
-0.068933	0.163621	0.134018	0.239477	-0.203973	0.018585	-0.251658	0.123353	0.001258	0.166425	0.085937	-0.112625
-0.076041	0.049754	-0.002182	0.260485	-0.230066	0.028968	-0.105990	-0.243764	-0.126812	0.149000	-0.028270	-0.338588
0.031705	-0.071967	0.056720	0.133289	-0.118785	0.002832	0.124471	-0.351872	-0.155902	-0.095268	-0.256248	-0.428375
0.167558	-0.110660	0.114131	-0.149302	0.065811	0.007128	0.215311	0.107587	0.057180	-0.495495	-0.447930	-0.272371
0.219953	-0.055438	0.011321	-0.293250	0.071185	0.084464	0.157779	0.557425	0.391269	-0.386067	-0.567779	-0.136942
0.178412	0.047875	-0.113960	-0.073701	-0.113029	0.220518	0.102139	0.234856	0.529213	0.088016	-0.671371	-0.338963
0.108427	0.126041	-0.082828	0.127559	-0.149867	0.358363	0.104032	-0.534680	0.338737	0.006588	-0.674395	-0.712700
0.056405	0.149717	-0.011935	-0.180993	0.144889	0.444650	0.072994	-0.788434	0.037528	-0.578039	-0.407855	-0.825682
0.037693	0.126793	-0.154846	-0.622383	0.508421	0.462194	-0.053776	-0.281677	-0.102256	-0.751459	0.060219	-0.575775
0.059399	0.025328	-0.469174	-0.391761	0.613603	0.422452	-0.210417	0.314466	-0.049366	-0.287998	0.401369	-0.201290
0.095702	-0.155363	-0.598206	0.335733	0.472720	0.337955	-0.272089	0.298318	0.035638	0.118318	0.402503	0.101398
0.082603	-0.258293	-0.328514	0.504564	0.284621	0.207629	-0.184310	-0.037683	0.017880	0.196349	0.205831	0.269063
-0.007953	-0.124184	0.125013	-0.176793	0.125312	0.032906	-0.037129	-0.296692	-0.092811	0.120591	0.113169	0.261952
-0.105222	0.107252	0.382048	-0.778932	-0.015178	-0.153575	0.020383	-0.362007	-0.181969	-0.027112	0.195998	0.087176
-0.109712	0.110258	0.307752	-0.607110	-0.090389	-0.283138	-0.022751	-0.119140	-0.183480	0.046728	0.206588	-0.151159
-0.029652	-0.141464	0.071354	-0.087828	-0.090772	-0.287791	-0.015184	0.197304	-0.149857	0.316803	-0.056626	-0.287335
0.016738	-0.296235	-0.095581	0.133289	-0.085784	-0.155364	0.110845	0.220962	-0.158546	0.281576	-0.404074	-0.179217
-0.054717	-0.177151	-0.110585	0.075611	-0.044725	0.046870	0.182003	0.065921	-0.225414	-0.135783	-0.462297	0.129467
-0.198002	-0.066332	-0.054696	0.041616	0.143354	0.213716	0.022654	0.118098	-0.307394	-0.424688	-0.173828	0.374976
-0.289285	-0.185040	-0.033315	0.062242	0.371761	0.271002	-0.242199	0.196178	-0.332328	-0.344037	0.134727	0.376847
-0.247010	-0.266558	-0.047944	0.049637	0.362548	0.222308	-0.309546	-0.044064	-0.281704	-0.251269	0.194485	0.265694
-0.110086	-0.034026	-0.058071	0.019847	0.078862	0.132083	-0.109017	-0.399920	-0.263948	-0.299736	0.091989	0.239871
-0.008701	0.268845	-0.104583	-0.005736	-0.202054	0.073723	0.082078	-0.238134	-0.366706	-0.144491	0.076104	0.283658
-0.021421	0.268093	-0.217111	-0.026354	-0.255009	0.075155	0.004112	0.165770	-0.461153	0.115667	0.197511	0.294137
-0.060329	0.059525	-0.280502	-0.014900	-0.118017	0.099860	-0.245226	-0.015161	-0.357639	0.084985	0.262942	0.301248
0.001774	-0.020126	-0.211485	0.013737	0.007846	0.075155	-0.352679	-0.387908	-0.090922	-0.098675	0.136618	0.392191
0.115537	0.043742	-0.139842	0.037032	-0.026306	-0.054076	-0.196796	-0.342112	0.136167	-0.287619	-0.053979	0.497356
0.105807	0.044869	-0.166849	0.097383	-0.141425	-0.279201	0.021518	-0.035055	0.198903	-0.528816	-0.098214	0.379467
-0.046861	-0.005851	-0.148469	0.139018	-0.155623	-0.522938	0.063532	0.170275	0.117271	-0.506097	0.037148	-0.064739
-0.129913	0.044869	0.015822	0.005719	-0.131064	-0.682208	-0.056425	-0.012908	-0.010832	0.079682	0.233819	-0.541731
0.013745	0.136940	0.149778	-0.207339	-0.289928	-0.691871	-0.121881	-0.242638	-0.076189	0.657712	0.373002	-0.621043
0.246151	0.077563	0.126138	-0.205812	-0.560841	-0.568392	-0.013670	-0.038809	-0.048232	0.481955	0.365438	-0.298559
0.304160	-0.078729	0.110003	-0.044300	-0.632215	-0.396238	0.149830	0.367038	0.005035	-0.150928	0.180491	-0.010493
0.128262	-0.067835	0.198183	-0.056137	-0.441501	-0.271327	0.192979	0.582209	0.050755	-0.348959	-0.097836	-0.035558
-0.091754	0.141449	0.186926	-0.176412	-0.208577	-0.244484	0.105924	0.404965	0.129364	0.080061	-0.346607	-0.204282
-0.160591	0.258698	-0.046068	-0.016427	-0.065446	-0.298886	0.014328	0.030635	0.215532	0.600137	-0.528837	-0.292199
-0.051724	0.109882	-0.281252	0.373930	-0.006735	-0.373331	0.006383	0.041146	0.207218	0.644455	-0.648308	-0.363654
0.129010	-0.095258	-0.290629	0.500745	-0.054702	-0.410196	0.068831	0.229599	0.094217	0.262258	-0.651711	-0.579516
0.245777	-0.082861	-0.114335	0.194404	-0.230066	-0.396596	0.128255	0.099329	-0.021787	-0.040364	-0.501994	-0.855985
0.243157	0.112513	0.104000	-0.200466	-0.476037	-0.368679	0.097218	-0.182202	-0.083744	-0.035063	-0.304263	-0.893022
0.192259	0.235023	0.267977	-0.390997	-0.684402	-0.379774	-0.043561	-0.521917	-0.125679	0.145970	-0.235832	-0.536868
0.185896	0.153475	0.275857	-0.390997	-0.721624	-0.450998	-0.181661	-0.405176	-0.188391	0.202788	-0.330350	-0.049400
0.199370	0.002789	0.094243	-0.239794	-0.522852	-0.545128	-0.182040	0.440264	-0.259415	0.034607	-0.455492	0.087925
0.143980	-0.002095	-0.119962	0.064916	-0.217403	-0.590941	-0.058317	0.868352	-0.277926	-0.110413	-0.543204	-0.273867
0.008508	0.148965	-0.170224	0.328094	-0.045876	-0.531886	0.061261	0.292310	-0.200102	0.030442	-0.677420	-0.702225
0.008508	0.148965	-0.170224	0.328094	-0.045876	-0.366531	0.061261	-0.271917	-0.200102	0.198622	-0.677420	-0.702225
-0.169943	0.159488	0.003444	-0.011845	-0.350557	-0.147848	0.088513	-0.240010	-0.055033	-0.143734	-0.829405	-0.319135
-0.069682	0.008799	-0.058071	-0.114556	-0.531678	0.051166	0.038929	0.005110	-0.053521	-0.725711	-0.574962	-0.072595
0.108052	-0.063327	-0.148094	0.077903	-0.520933	0.178270	0.002977	-0.072968	0.060959	-0.751080	-0.282335	-0.077085
0.193756	-0.085866	-0.108709	0.214648	-0.344801	0.226963	0.041200	-0.501647	0.239720	-0.227793	-0.078554	-0.026205
0.091211	-0.117422	0.033455	0.056130	-0.167134	0.234840	0.108952	-0.550821	0.231405	0.178925	0.112034	0.115994
-0.079783	-0.124935	0.093118	-0.158084	-0.085784	0.250594	0.058233	0.018999	-0.029343	0.115667	0.260294	-0.011989
-0.139266	-0.087369	-0.010059	-0.110356	0.000939	0.301077	-0.118854	0.377177	-0.264704	-0.185006	0.213396	-0.406677
-0.094373	-0.028015	-0.176976	0.109225	0.244698	0.373759	-0.202093	0.070050	-0.203880	-0.349338	0.045846	-0.495715
-0.093251	0.062532	-0.297006	0.131761	0.580590	0.432835	-0.045831	-0.399545	0.097996	-0.238017	0.022019	-0.022838
-0.166576	0.161367	-0.333390	-0.158466	0.724544	0.447872	0.185409	-0.412683	0.379931	0.088394	0.164984	0.453568
-0.170318	0.150092	-0.266248	-0.407797	0.513795	0.410278	0.255053	0.094824	0.459674	0.506197	0.240627	0.331563
-0.026285	0.005418	-0.100457	-0.257358	0.156406	0.331152	0.174811	0.453782	0.329667	0.618697	0.171414	-0.205779
0.114040	-0.115919	0.102874	0.081723	0.014371	0.234124	0.102518	0.340752	0.093839	0.181197	0.119977	-0.515917
0.051914	-0.145220	0.261973	0.116864	0.206694	0.148911	0.063153	0.021251	-0.104145	-0.225521	0.163850	-0.309408
-0.171066	-0.212839	0.282236	-0.106919	0.524544	0.109169	-0.028805	-0.157428	-0.159679	-0.134647	0.211126	0.176622
-0.308365	-0.349954	0.116382	-0.075610	0.651991	0.134589	-0.154798	-0.022293	-0.103389	0.028549	0.259538	0.571832
-0.229053	-0.376625	-0.080952	0.258193	0.461588	0.207987	-0.189229	0.028383	-0.073922	0.095212	0.398721	0.676622
-0.073049	-0.216971	-0.038942	0.336115	0.153719	0.278878	-0.084802	-0.119890	-0.144190	0.367561	0.531096	0.537027
-0.015810	-0.020878	0.240585	-0.070264	0.025504	0.294274	0.057476	-0.237007	-0.232592	0.540288	0.426709	0.373105
-0.033767	0.096729	0.402311	-0.499435	0.083469	0.244507	0.100246	-0.197593	-0.236748	0.208470	0.112791	0.382461
-0.001593	0.133557	0.204938	-0.502108	0.104582	0.170393	-0.001563	-0.077848	-0.149857	-0.282318	-0.086494	0.558359
0.104310	0.030964	-0.134215	-0.148920	0.061972	0.132799	-0.155555	0.042272	-0.020654	-0.405756	0.018237	0.712925
0.204609	-0.217347	-0.245618	0.195168	0.132221	0.165022	-0.210417	0.125605	0.076832	-0.199773	0.247057	0.638449
0.210223	-0.354461	-0.088829	0.254373	0.311108	0.247729	-0.120746	-0.080100	0.058314	-0.054374	0.338207	0.325200
0.055657	-0.146347	0.063099	0.058422	0.393642	0.322917	-0.008373	-0.409680	-0.044455	-0.001742	0.301520	0.069212
-0.212966	0.225252	0.031579	-0.072555	0.314563	0.332584	-0.013670	-0.304950	-0.049744	0.183849	0.349931	0.180739
-0.373460	0.402629	-0.088079	0.078285	0.207461	0.253816	-0.118854	0.232979	0.135789	0.143697	0.542064	0.525051
-0.236909	0.339871	-0.132340	0.289515	0.164467	0.110959	-0.189607	0.481195	0.367460	-0.155094	0.666119	0.662401
0.079983	0.227883	-0.068574	0.210447	0.147577	-0.041191	-0.142691	0.198056	0.467233	0.014161	0.556058	0.486877
0.274594	0.115519	0.030829	-0.111883	0.109573	-0.146417	-0.022373	0.020875	0.415079	0.459985	0.351066	0.279916
0.238292	-0.053184	0.090866	-0.305850	0.060436	-0.180776	0.062018	0.209697	0.279024	0.263773	0.286013	0.169886
0.137992	-0.182786	0.094619	-0.189012	0.012452	-0.157154	0.048392	0.319723	0.143726	-0.404241	0.379054	0.075949
0.126765	-0.125310	0.085238	0.043907	-0.041655	-0.113489	-0.011779	-0.106001	0.080990	-0.567059	0.505756	0.087925
0.162693	0.054264	0.079609	0.145130	-0.108808	-0.087004	-0.029183	-0.604124	0.054157	-0.033549	0.593123	0.294886
0.156705	0.148214	0.033455	0.124885	-0.211647	-0.095593	-0.013292	-0.432578	-0.034254	0.492182	0.588963	0.440844
0.120028	0.086958	-0.034065	0.161173	-0.374349	-0.132816	-0.042804	0.199558	-0.132101	0.578167	0.435030	0.315095
0.086346	-0.007354	0.004194	0.291043	-0.491770	-0.177913	-0.093504	0.651304	-0.082989	0.393697	0.188055	0.164646
0.015242	-0.016745	0.185801	0.343373	-0.373965	-0.205114	-0.044696	0.333992	0.088170	0.066803	-0.019953	0.226024
-0.118690	0.027582	0.351654	0.209301	-0.081179	-0.192229	0.106302	-0.243013	0.200793	-0.222492	-0.164376	0.320709
-0.220448	0.020445	0.356532	0.053839	0.038555	-0.125658	0.200171	-0.141287	0.187944	-0.282697	-0.253979	0.300874
-0.181915	-0.041915	0.244337	0.100057	-0.127227	-0.014348	0.158157	0.251754	0.093839	-0.061568	-0.169291	0.313599
-0.056588	-0.038158	0.121636	0.278056	-0.214717	0.109169	0.106302	0.006236	-0.073544	0.338773	0.144561	0.352895
-0.009076	0.089965	0.005319	0.343755	0.056598	0.199036	0.163456	-0.447593	-0.250726	0.528167	0.442972	0.190844
-0.083524	0.212851	-0.102332	0.297918	0.447001	0.220876	0.240292	-0.348869	-0.264326	0.294076	0.452806	-0.100654
-0.135525	0.195188	-0.114711	0.316635	0.576751	0.175047	0.183138	0.210448	-0.057677	0.091803	0.248570	-0.208024
-0.056962	0.097857	0.053718	0.311287	0.413220	0.095921	0.011680	0.520249	0.202305	0.166046	0.049250	-0.152281
0.059025	0.027206	0.329891	0.053457	0.170993	0.031474	-0.106747	0.137617	0.351209	0.212637	-0.153790	-0.216254
0.088591	-0.079105	0.509253	-0.314250	0.018594	0.015363	-0.079126	-0.161932	0.372373	0.084228	-0.466834	-0.423886
0.089714	-0.273319	0.468352	-0.415816	0.008230	0.052241	0.025303	0.280294	0.305479	-0.107384	-0.780633	-0.574279
0.166061	-0.379255	0.277733	-0.230631	0.091530	0.124564	0.082835	0.735795	0.210997	-0.237638	-0.871371	-0.581013
0.243531	-0.239886	0.088990	-0.022536	0.140283	0.206913	0.041579	0.418859	0.180007	-0.108899	-0.679310	-0.461671
0.187019	-0.022005	-0.017561	0.141692	0.089227	0.273866	-0.049993	-0.155551	0.214398	0.111122	-0.345851	-0.263392
0.043307	0.051633	-0.052070	0.291425	0.036636	0.307163	-0.114692	-0.292563	0.199659	-0.105870	-0.087250	-0.118237
-0.040875	0.075684	-0.067449	0.217704	0.118402	0.302509	-0.144204	0.003233	0.093839	-0.559486	-0.013526	-0.087560
-0.047609	0.217361	-0.122588	-0.200466	0.316099	0.273150	-0.184688	0.055410	-0.004031	-0.513291	0.014076	-0.039299
-0.051350	0.314317	-0.234740	-0.575037	0.457365	0.243433	-0.235767	-0.201347	-0.048610	0.056576	0.192972	0.063598
-0.037882	0.140322	-0.340517	-0.481108	0.408613	0.227321	-0.228956	-0.177323	-0.125679	0.494455	0.444107	0.059107
0.053411	-0.120427	-0.341267	-0.118374	0.232413	0.216580	-0.125665	0.181912	-0.276037	0.425894	0.522019	-0.003010
0.152588	-0.102771	-0.208484	0.040470	0.093066	0.183282	0.032116	0.329486	-0.414307	0.072106	0.405529	0.165021
0.112918	0.153851	-0.050945	-0.013372	0.053527	0.106304	0.185409	0.178533	-0.443775	-0.207346	0.257269	0.505215
-0.047609	0.274858	-0.040067	-0.001917	0.038172	-0.010769	0.319777	-0.042188	-0.333839	-0.316775	0.089341	0.580440
-0.136273	0.130551	-0.207359	0.054985	-0.031678	-0.136753	0.440519	-0.097368	-0.116612	-0.256949	-0.171560	0.294512
-0.056588	-0.047549	-0.364148	0.011065	-0.154088	-0.231599	0.510920	-0.036557	0.071541	-0.044529	-0.408611	0.025799
0.060522	-0.094131	-0.305258	-0.019863	-0.250788	-0.260590	0.455280	-0.031677	0.060203	0.076652	-0.422977	-0.050897
0.063142	-0.077602	-0.047944	0.041616	-0.240811	-0.203682	0.249754	-0.023794	-0.107167	-0.048316	-0.238100	-0.140683
-0.021421	-0.059946	0.204187	0.055367	-0.178263	-0.065887	-0.003455	-0.078974	-0.154390	-0.149414	-0.088384	-0.278357
-0.067063	-0.010359	0.286363	0.107315	-0.248485	0.112391	-0.144582	-0.139785	0.042441	0.158849	-0.123545	-0.231967
-0.022918	0.044869	0.224825	0.436574	-0.467595	0.257754	-0.115827	-0.061707	0.259750	0.462258	-0.238856	-0.027328
0.039564	0.040735	0.169666	0.712357	-0.511340	0.298213	-0.000428	-0.051572	0.266175	0.174000	-0.241125	-0.027328
0.021976	0.029461	0.187677	0.324656	-0.102668	0.211567	0.088891	-0.114635	0.142970	-0.241803	-0.146607	-0.414159
-0.068933	0.092220	0.163662	-0.415434	0.514563	0.046870	0.113494	0.052032	0.098752	-0.064219	-0.172694	-0.912101
-0.092128	0.143328	-0.001057	-0.493708	0.787116	-0.106689	0.083214	0.193549	0.158465	0.417561	-0.352278	-1.062868
0.056031	0.062907	-0.161597	0.200516	0.534909	-0.182208	-0.001563	0.084314	0.200793	0.336500	-0.393488	-0.692124
0.264864	-0.059946	-0.080952	0.629087	0.142586	-0.181850	-0.115070	-0.032803	0.143726	-0.242182	-0.123166	-0.138065
0.322873	-0.070840	0.230454	0.187528	-0.000212	-0.164670	-0.172581	0.067047	0.006169	-0.459902	0.189946	0.084931
0.196001	-0.046422	0.504000	-0.496381	0.057365	-0.190082	-0.128691	0.072302	-0.110945	-0.052859	0.203562	-0.049400
0.051540	-0.154236	0.533643	-0.622765	0.056214	-0.263095	-0.062479	0.076431	-0.095456	0.367182	-0.038856	-0.078581
0.011501	-0.301118	0.388427	-0.216885	-0.093075	-0.323940	-0.057938	0.263395	0.027325	0.127031	-0.260406	0.145185
0.013745	-0.234251	0.278859	0.200516	-0.270742	-0.297097	-0.060587	0.153758	0.101020	-0.459145	-0.331862	0.193838
-0.044990	0.048627	0.290866	0.330768	-0.277265	-0.154291	0.013950	-0.170190	0.069274	-0.572360	-0.294055	-0.156022
-0.138892	0.265838	0.294619	0.224198	-0.010189	0.060833	0.088513	-0.200596	0.037906	-0.150171	-0.216550	-0.458678
-0.156475	0.226004	0.120885	0.043907	0.337596	0.263125	0.034387	0.053533	0.033370	0.149379	-0.148119	-0.254413
-0.061825	0.042238	-0.196481	-0.078282	0.419745	0.388080	-0.082910	0.062167	-0.061833	-0.065355	-0.065321	0.269811
0.069504	-0.049803	-0.426789	-0.071791	0.192490	0.425674	-0.080640	-0.272293	-0.248837	-0.416737	0.099553	0.575200
0.149220	0.041487	-0.412535	0.058804	-0.040120	0.411711	0.029845	-0.331227	-0.351217	-0.305415	0.298872	0.436727
0.141735	0.206462	-0.237741	0.236421	-0.086551	0.384858	0.051798	0.033263	-0.302482	0.134228	0.375272	0.105515
0.062393	0.281246	-0.075701	0.330768	-0.051248	0.353708	-0.051885	0.149629	-0.236748	0.328925	0.274288	-0.039299
-0.022169	0.212851	-0.001807	0.237949	-0.065446	0.297497	-0.068911	-0.084605	-0.232592	0.185743	0.096527	0.123105
-0.028529	0.096353	-0.013060	0.004955	-0.098831	0.193665	0.112737	-0.120641	-0.204636	-0.002878	-0.035832	0.397805
0.032828	0.052009	-0.092580	-0.184048	-0.057388	0.047944	0.283441	-0.021542	-0.098100	0.038016	-0.025624	0.536652
0.048920	0.098232	-0.178101	-0.182521	0.047385	-0.099888	0.204334	-0.149545	0.007302	0.270970	0.147586	0.465170
-0.025162	0.152723	-0.195731	0.001137	0.073488	-0.197240	-0.043939	-0.321091	0.028836	0.456576	0.335559	0.238000
-0.069307	0.159863	-0.159347	0.231073	-0.032062	-0.214777	-0.195282	-0.277923	-0.017632	0.361879	0.352201	-0.075962
0.011127	0.151596	-0.124088	0.331914	-0.105354	-0.165386	-0.186202	-0.098494	-0.059944	0.000529	0.200915	-0.370388
0.101690	0.140698	-0.075326	0.217322	-0.047411	-0.094878	-0.182797	-0.083854	-0.034632	-0.172132	0.028070	-0.465786
0.042184	0.055767	0.013572	0.003046	-0.037818	-0.054792	-0.256576	-0.083854	0.080234	-0.051345	-0.078932	-0.266385
-0.099985	-0.112538	0.120885	-0.112265	-0.192077	-0.074835	-0.286467	0.259265	0.228004	0.055061	-0.119764	0.040769
-0.111956	-0.224108	0.247339	-0.105392	-0.274963	-0.146775	-0.202093	0.530012	0.292630	0.066046	-0.117117	0.101398
0.035447	-0.201193	0.392555	-0.114174	-0.077726	-0.228736	-0.089720	0.350891	0.226114	-0.068762	-0.124679	-0.176224
0.144729	-0.194807	0.443212	-0.182139	0.200168	-0.264169	-0.022373	-0.097368	0.131632	-0.453087	-0.174962	-0.434361
0.104310	-0.325912	0.298371	-0.218030	0.261972	-0.217283	0.018490	-0.379275	0.137301	-0.721924	-0.205964	-0.294817
0.030208	-0.428090	0.075106	-0.175266	0.137596	-0.099888	0.045364	-0.402172	0.204572	-0.427717	-0.157571	0.118239
0.017112	-0.299991	-0.026564	-0.080192	0.066195	0.032190	0.051041	-0.286932	0.161110	0.007345	-0.103507	0.345410
-0.028903	-0.067084	0.011696	0.041616	0.158709	0.113107	0.059368	-0.089860	-0.042188	0.099000	-0.111446	0.231637
-0.176303	0.026831	0.079609	0.097765	0.313028	0.118836	0.074887	0.248750	-0.223903	0.150137	-0.076664	0.078943
-0.287789	0.024953	0.122761	-0.026736	0.335292	0.083390	0.046499	0.528885	-0.192547	0.313773	0.089341	0.132835
-0.214837	0.085831	0.124262	-0.244376	0.147960	0.076945	-0.022373	0.344882	0.001258	0.055061	0.245922	0.264197
-0.022544	0.086958	0.052968	-0.318450	-0.081947	0.153923	-0.022751	-0.036557	0.133522	-0.455359	0.254621	0.276173
0.114415	-0.144093	-0.092205	-0.210776	-0.126843	0.309670	0.108195	-0.229875	0.082501	-0.492466	0.260294	0.217790
0.118157	-0.378128	-0.276751	-0.080573	0.014371	0.478664	0.258838	-0.261782	-0.065988	-0.289891	0.428600	0.223778
0.014119	-0.282335	-0.430164	0.057658	0.176367	0.568889	0.254675	-0.200596	-0.175924	-0.132375	0.621490	0.289272
-0.135525	0.007672	-0.430164	0.275000	0.266195	0.519838	0.070345	-0.272668	-0.197080	0.170970	0.647208	0.346158
-0.230549	0.126793	-0.233240	0.379660	0.239707	0.337239	-0.148366	-0.304575	-0.124167	0.360364	0.570052	0.386578
-0.192390	0.076812	-0.014936	0.107697	0.047768	0.091983	-0.271711	-0.062833	0.032237	0.178925	0.509916	0.411278
-0.080905	0.097857	-0.001807	-0.380306	-0.210112	-0.121363	-0.297817	0.118849	0.179629	0.153167	0.425196	0.363748
-0.035263	0.187672	-0.195731	-0.631165	-0.299521	-0.231599	-0.254684	0.167647	0.167535	0.547864	0.269750	0.179616
-0.080531	0.174895	-0.418161	-0.471562	-0.139890	-0.227662	-0.119989	0.084689	-0.025943	0.613394	0.088207	-0.111129
-0.113453	0.053888	-0.523563	-0.115701	0.100360	-0.153933	0.087756	0.002107	-0.230703	0.086500	-0.104641	-0.335970
-0.089509	-0.062200	-0.460922	0.147040	0.204390	-0.085214	0.242563	0.263020	-0.262815	-0.164938	-0.294811	-0.305293
-0.063696	-0.122681	-0.265123	0.143984	0.070033	-0.086288	0.242941	0.408720	-0.111323	0.245212	-0.387061	-0.057631
-0.050602	-0.124935	-0.062948	-0.077901	-0.195147	-0.182208	0.141503	0.124854	0.065872	0.526273	-0.366267	0.116742
-0.017306	-0.074972	0.021824	-0.231776	-0.329452	-0.342909	0.054448	0.081686	0.082879	0.109985	-0.373828	0.005220
-0.002342	-0.021629	-0.019812	-0.125247	-0.249636	-0.500031	-0.005347	0.191296	-0.080344	-0.302386	-0.478176	-0.280601
-0.049854	-0.021629	-0.103083	0.027865	-0.200519	-0.589151	-0.111665	-0.078599	-0.216347	-0.216055	-0.570804	-0.459801
-0.066689	-0.074597	-0.122963	-0.061100	-0.349406	-0.589151	-0.270576	-0.420941	-0.130590	-0.137676	-0.578743	-0.413411
0.047798	-0.133951	-0.020187	-0.272631	-0.511724	-0.531886	-0.375381	-0.387533	0.076076	-0.319047	-0.563620	-0.301177
0.196001	-0.139210	0.131016	-0.278741	-0.500596	-0.479273	-0.334140	0.053158	0.153930	-0.355775	-0.557949	-0.356920
0.210597	-0.057692	0.161786	-0.060337	-0.404280	-0.480704	-0.179391	0.320474	0.084013	-0.014995	-0.501994	-0.579516
0.123771	0.068920	0.040210	0.104641	-0.373198	-0.541191	-0.023886	-0.028674	0.049999	0.289152	-0.371560	-0.716815
0.093082	0.144456	-0.060322	0.047727	-0.433443	-0.619216	0.050663	-0.375146	0.096107	0.135364	-0.224868	-0.616553
0.134624	0.105372	-0.024313	-0.104628	-0.540504	-0.655007	0.055962	-0.065836	0.092327	-0.242182	-0.134509	-0.409670
0.126391	-0.006227	0.042086	-0.129065	-0.580795	-0.609552	0.068831	0.229599	0.004658	-0.548505	-0.129594	-0.251046
0.023846	-0.056565	0.028202	0.002664	-0.455699	-0.491084	0.137340	-0.121392	-0.054655	-0.751459	-0.165889	-0.098035
-0.090632	0.015185	0.002694	0.109225	-0.271125	-0.353289	0.211147	-0.471992	-0.016121	-0.717002	-0.125435	0.100649
-0.139266	0.081697	0.055969	0.090508	-0.215101	-0.266316	0.203199	-0.280551	0.068140	-0.337222	0.059084	0.226772
-0.116445	0.028334	0.121260	0.039324	-0.266521	-0.272759	0.117658	0.134614	0.108578	0.063016	0.261429	0.154167
-0.044242	-0.014116	0.077733	0.011446	-0.310266	-0.359015	0.059368	0.338123	0.057558	0.183849	0.279583	-0.057631
0.048920	0.085831	-0.080202	-0.026736	-0.395070	-0.462093	0.097218	0.118849	-0.046344	0.187258	0.095393	-0.215880
0.109923	0.152723	-0.247869	-0.014900	-0.539736	-0.511127	0.180110	-0.119140	-0.100745	0.073622	-0.092543	-0.155648
0.107678	0.005043	-0.310134	0.072173	-0.540504	-0.468893	0.203956	-0.053073	-0.060699	-0.388717	-0.117495	0.104766
0.083726	-0.176776	-0.221612	0.039706	-0.317173	-0.341120	0.129770	0.071927	0.003146	-0.756381	-0.018819	0.330814
0.076615	-0.151607	-0.050570	-0.190157	-0.165600	-0.168249	0.023411	0.099704	0.025058	-0.283454	0.096905	0.311727
0.026465	-0.002095	0.070228	-0.290959	-0.319475	-0.004326	-0.021616	-0.087608	0.014858	0.676273	0.256512	0.101772
-0.122431	0.097105	0.073606	-0.000390	-0.553167	0.100576	-0.008373	-0.395791	-0.044077	0.962258	0.517480	-0.107762
-0.256363	0.168507	-0.002933	0.399904	-0.523236	0.123490	-0.053020	-0.324470	-0.197836	0.294076	0.727011	-0.195678
-0.203613	0.228259	-0.107584	0.443067	-0.247718	0.078019	-0.212308	0.084689	-0.354995	-0.246347	0.635483	-0.030321
-0.003090	0.156481	-0.223488	0.091272	0.014371	0.007486	-0.367435	0.163143	-0.340261	0.070970	0.281474	0.468913
0.125642	-0.050930	-0.314260	-0.263468	0.136060	-0.040117	-0.370084	-0.102998	-0.195947	0.512258	-0.026002	0.980140
0.079235	-0.180532	-0.311635	-0.319214	0.153719	-0.035465	-0.240307	-0.246767	-0.181969	0.210364	-0.123166	0.918389
-0.031148	-0.078353	-0.190480	-0.168011	0.122241	0.017153	-0.106368	0.102332	-0.367839	-0.322454	-0.121654	0.210679
-0.076416	0.130927	-0.025063	-0.045446	0.093450	0.089476	-0.023508	0.496591	-0.482687	-0.162666	-0.150388	-0.501701
-0.046113	0.186169	0.073230	-0.025972	0.096521	0.154281	0.023411	0.391071	-0.317594	0.317561	-0.238100	-0.655835
0.008134	-0.002470	0.052968	-0.117610	0.081934	0.201184	0.009031	-0.062082	-0.047099	0.253167	-0.363620	-0.349064
0.042558	-0.242891	-0.029564	-0.319214	0.023584	0.237346	-0.099558	-0.289185	0.031859	-0.300872	-0.421465	-0.013486
0.045926	-0.320277	-0.048319	-0.407797	0.031646	0.271718	-0.221767	0.162767	-0.071277	-0.540554	-0.340558	0.087551
0.042558	-0.268436	0.061223	-0.189775	0.176367	0.301435	-0.216092	0.508607	-0.085633	-0.168346	-0.321276	-0.048278
0.053411	-0.247024	0.184675	0.039324	0.325696	0.311102	-0.070424	0.201060	0.101776	0.114531	-0.593110	-0.255162
0.053037	-0.255664	0.131016	-0.052700	0.356790	0.288904	0.076022	-0.208854	0.298299	-0.033927	-0.901616	-0.337466
0.004018	-0.183537	-0.098957	-0.163811	0.361396	0.247729	0.121442	-0.122518	0.328155	-0.146385	-0.736399	-0.311278
-0.100733	-0.021253	-0.272250	0.052693	0.421281	0.226247	0.107817	0.053909	0.260506	-0.010830	-0.128837	-0.377496
-0.232420	0.147086	-0.214486	0.256665	0.406694	0.262409	0.109709	-0.087233	0.197392	0.046728	0.332533	-0.520407
-0.316221	0.242539	0.001193	0.100821	0.239323	0.360511	0.122957	-0.193088	0.079478	-0.086180	0.361656	-0.395453
-0.253370	0.195188	0.204562	-0.090119	0.105734	0.484034	0.111980	-0.158179	-0.116234	-0.095268	0.300007	0.137700
-0.047609	0.014058	0.304000	-0.009172	0.200552	0.580704	0.085863	0.028008	-0.211436	0.207334	0.473986	0.632087
0.137992	-0.143718	0.284112	0.123357	0.446617	0.619373	0.080564	0.195802	-0.075811	0.364152	0.707344	0.545260
0.147723	-0.155739	0.196307	0.147804	0.606310	0.601829	0.124092	0.196929	0.148261	0.208849	0.641535	-0.020220
0.023098	-0.110284	0.158409	0.203571	0.563315	0.548481	0.222502	0.269404	0.251058	0.151652	0.239871	-0.437354
-0.061077	-0.099766	0.202311	0.248644	0.436252	0.476515	0.328483	0.395953	0.226870	0.087258	-0.206720	-0.383482
-0.027407	-0.014116	0.196683	0.106933	0.430110	0.394883	0.336053	0.216456	0.209108	-0.224007	-0.434698	-0.150784
0.036570	0.185418	0.047339	-0.101956	0.542202	0.312534	0.190708	-0.064710	0.260506	-0.119880	-0.421465	-0.072595
0.045926	0.232392	-0.135341	-0.139756	0.536060	0.242359	-0.005347	-0.060206	0.319085	0.567182	-0.292164	-0.072969
0.050417	-0.022756	-0.193105	-0.011081	0.309573	0.196888	-0.087829	0.027632	0.266553	0.772864	-0.168157	-0.008248
0.110298	-0.235378	-0.098957	0.177215	0.070801	0.179344	-0.034102	0.083939	0.056424	0.244834	-0.130350	-0.012737
0.122648	-0.042290	0.091617	0.376222	0.014755	0.187937	0.027953	0.227721	-0.174035	0.004695	-0.182146	-0.169864
-0.046487	0.314317	0.314881	0.487376	0.093834	0.216938	0.016598	0.097452	-0.220503	0.366803	-0.194622	-0.226355
-0.283673	0.327094	0.472855	0.414037	0.177903	0.264199	-0.015184	-0.386031	-0.104523	0.365288	-0.036588	0.014199
-0.314725	0.015185	0.475482	0.208155	0.197097	0.322917	-0.015184	-0.487758	-0.075433	-0.223628	0.225120	0.324078
-0.089135	-0.144469	0.333268	0.008392	0.162548	0.373759	-0.027670	-0.002398	-0.204258	-0.342144	0.391535	0.388074
0.138367	0.016688	0.147527	-0.035900	0.201319	0.383426	-0.089342	0.368540	-0.244681	0.195970	0.371868	0.263823
0.163067	0.188424	0.022949	0.150859	0.403239	0.318979	-0.136259	0.119599	-0.061833	0.336879	0.241005	0.239497
0.080358	0.153099	-0.002182	0.369729	0.585580	0.172541	-0.103341	-0.273794	0.111980	-0.135783	0.104092	0.399676
0.097199	0.044869	0.030454	0.287605	0.505350	-0.024011	-0.034859	-0.218989	0.071163	-0.454980	0.003488	0.517191
0.238292	-0.002470	0.066476	-0.029409	0.243546	-0.201893	-0.004590	0.081311	-0.024810	-0.326998	-0.080444	0.340545
0.341959	-0.038158	0.115632	-0.163811	0.056598	-0.286359	0.003356	0.076806	0.060581	-0.233473	-0.186304	-0.081200
0.274968	-0.074597	0.215819	-0.034373	-0.011340	-0.235536	0.044228	-0.112758	0.280536	-0.411436	-0.312958	-0.397698
0.074370	-0.039661	0.344525	0.056512	-0.072737	-0.070898	0.086242	0.026881	0.444935	-0.383037	-0.376475	-0.336344
-0.102229	0.053137	0.428577	0.044671	-0.106121	0.132083	0.040443	0.241615	0.485752	-0.162666	-0.250955	-0.049774
-0.120935	0.142577	0.408315	0.103877	-0.005201	0.285681	-0.089720	0.091821	0.432086	-0.283833	0.103335	0.083060
0.007011	0.227507	0.260848	0.190202	0.162164	0.338671	-0.179770	-0.178824	0.307747	-0.540554	0.546603	-0.017227
0.146600	0.260201	0.042836	0.179125	0.191722	0.292484	-0.121503	-0.295191	0.152796	-0.233473	0.860900	-0.034062
0.207603	0.152723	-0.109834	0.160409	0.053910	0.182924	0.054448	-0.049320	0.015236	0.540667	0.941081	0.224901
0.243157	-0.000968	-0.118837	0.153151	-0.020166	0.050808	0.209255	0.276163	-0.101878	0.851273	0.824591	0.516443
0.310897	-0.018624	-0.055821	-0.006118	0.125312	-0.073761	0.239913	0.061041	-0.196702	0.299379	0.615816	0.563224
0.332977	0.017439	-0.020562	-0.205430	0.314947	-0.169323	0.179732	-0.227623	-0.215214	-0.132754	0.453184	0.466293
0.216585	-0.090750	-0.001807	-0.106156	0.281550	-0.227662	0.144910	-0.067713	-0.118878	0.212258	0.405151	0.429242
0.027214	-0.198564	0.085988	0.194022	0.018978	-0.253790	0.169891	0.270155	0.027325	0.484606	0.325347	0.388074
-0.100733	-0.003222	0.274731	0.240622	-0.248102	-0.263095	0.167241	0.493211	0.090060	0.252409	0.055302	0.241368
-0.148993	0.349642	0.442461	0.023665	-0.342499	-0.266316	0.087377	0.389193	-0.008565	0.188016	-0.215416	0.125724
-0.175555	0.397744	0.379797	-0.019863	-0.259997	-0.254505	0.011301	0.018623	-0.197836	0.414152	-0.158327	0.154167
-0.169195	0.101990	0.040585	0.184855	-0.111877	-0.202251	0.007896	-0.198719	-0.312305	0.316046	0.115438	0.190096
-0.086891	-0.092253	-0.324013	0.266597	-0.016329	-0.090225	0.017733	-0.062082	-0.270749	-0.057025	0.151747	0.135455
0.027588	0.014058	-0.414035	0.113426	-0.046260	0.066204	-0.021238	0.235232	-0.165346	0.105061	-0.150388	0.100275
0.092334	0.100863	-0.206984	-0.003827	-0.203973	0.209419	-0.060208	0.434255	-0.109812	0.630061	-0.430539	0.096907
0.103187	-0.035153	0.058596	0.014501	-0.378186	0.267421	-0.064370	0.205941	-0.088278	0.508849	-0.480822	-0.026954
0.092334	-0.084364	0.138896	0.007628	-0.375500	0.207271	-0.102206	-0.198719	-0.018010	-0.027869	-0.445662	-0.217376
0.028337	0.203832	-0.024313	-0.021391	-0.124157	0.063698	-0.186580	-0.237007	0.113114	-0.251269	-0.402562	-0.214009
-0.102229	0.482674	-0.276376	0.100821	0.174064	-0.078056	-0.196039	-0.007653	0.244255	-0.171754	-0.255492	-0.039673
-0.167325	0.305673	-0.389279	0.338789	0.229726	-0.147490	-0.080640	0.089194	0.309259	-0.033170	-0.054735	-0.017601
-0.030774	-0.117422	-0.269624	0.416329	-0.005201	-0.142838	0.014706	0.018999	0.275245	-0.013102	0.050385	-0.202412
0.187393	-0.210960	-0.025438	0.167666	-0.266521	-0.130669	-0.025778	-0.145416	0.170181	-0.185385	0.129432	-0.289954
0.218831	0.076060	0.166289	-0.214212	-0.268823	-0.185071	-0.100693	-0.139034	0.087414	-0.236502	0.301142	-0.171735
0.050417	0.236902	0.207564	-0.332960	-0.083481	-0.319287	-0.067019	-0.093614	0.111980	-0.000606	0.372624	-0.104021
-0.031896	0.033219	0.159159	-0.090501	-0.087319	-0.467104	0.055205	-0.146167	0.229516	0.175137	0.091232	-0.214757
0.119654	-0.185791	0.182048	0.083632	-0.406582	-0.528664	0.172919	0.024254	0.342894	0.048622	-0.368535	-0.294069
0.288442	-0.103147	0.301748	-0.159611	-0.629145	-0.435966	0.261109	0.207443	0.375774	-0.316396	-0.575340	-0.195304
0.229684	0.092220	0.304750	-0.428798	-0.355546	-0.200103	0.299717	0.244244	0.345918	-0.608331	-0.398781	-0.090553
0.008882	0.085079	0.061598	-0.147011	0.224736	0.096995	0.245969	0.193549	0.322864	-0.468990	-0.095189	-0.140683
-0.146749	-0.049052	-0.203608	0.419003	0.624352	0.338671	0.158157	-0.031302	0.322108	-0.023325	0.096149	-0.186699
-0.144878	-0.025010	-0.211485	0.457200	0.646617	0.435699	0.175568	-0.218239	0.264663	0.132712	0.210370	-0.000392
-0.039004	0.149717	-0.026188	-0.150829	0.405926	0.369462	0.284198	-0.118013	0.088170	-0.027869	0.396452	0.324826
0.120777	0.174895	0.084863	-0.661329	0.075791	0.198678	0.285334	0.035890	-0.126812	0.032714	0.650990	0.504841
0.304909	-0.059570	0.022199	-0.546018	-0.174042	0.020733	0.096461	-0.020040	-0.209925	0.452788	0.803033	0.488748
0.426540	-0.292102	-0.100832	-0.092028	-0.228148	-0.088077	-0.101450	-0.181076	-0.099989	0.766425	0.739114	0.461802
0.361795	-0.266182	-0.132715	0.147422	-0.152169	-0.103825	-0.120746	-0.304950	0.071919	0.585743	0.538282	0.486877
0.091959	-0.073845	0.009070	0.016792	-0.085400	-0.052286	-0.012914	-0.089860	0.142592	0.189152	0.348797	0.438599
-0.215959	0.010302	0.236833	-0.212685	-0.035132	0.026104	0.054069	0.167647	0.092705	-0.025976	0.227768	0.275051
-0.360366	-0.089623	0.299872	-0.223376	0.056598	0.106662	0.020383	0.062167	0.000124	0.125137	0.160824	0.118614
-0.319962	-0.192178	0.054469	0.041998	0.155254	0.188295	-0.063235	0.025005	-0.104523	0.311500	0.149856	0.080814
-0.251874	-0.130570	-0.294005	0.352922	0.207845	0.278162	-0.151393	0.272032	-0.248459	0.113394	0.183517	0.169137
-0.278810	0.037353	-0.399032	0.412891	0.243546	0.371610	-0.222524	0.159764	-0.395796	-0.192958	0.190325	0.312101
-0.369719	0.132054	-0.198732	0.174159	0.274640	0.443576	-0.244847	-0.309079	-0.415441	-0.279289	0.110900	0.410904
-0.403015	0.072302	0.041711	-0.074464	0.250072	0.462194	-0.210417	-0.544440	-0.222014	-0.381144	-0.028270	0.426248
-0.288537	-0.059570	0.088615	-0.050027	0.178671	0.409562	-0.162744	-0.383404	0.073431	-0.446650	-0.171182	0.392940
-0.065192	-0.138834	-0.035566	0.121066	0.145273	0.299287	-0.153663	0.004734	0.241231	-0.185006	-0.290274	0.289646
0.096450	-0.132448	-0.197231	0.090126	0.162932	0.171467	-0.185823	0.352017	0.189833	0.025141	-0.361352	0.051248
0.071750	-0.095258	-0.312385	-0.156938	0.159861	0.072291	-0.225929	0.312964	0.059826	-0.308823	-0.347741	-0.205031
-0.040127	-0.101268	-0.323263	-0.310432	0.108421	0.026820	-0.230848	-0.051572	0.017502	-0.804469	-0.215794	-0.197923
-0.034889	-0.179405	-0.215236	-0.256977	0.045849	0.029326	-0.159338	-0.358254	0.059448	-0.690497	0.037526	0.110754
0.092708	-0.251907	-0.085078	-0.119901	-0.017096	0.052599	-0.010644	-0.248644	0.077210	-0.066869	0.331399	0.364122
0.123771	-0.172268	-0.024688	0.115336	-0.104203	0.063340	0.135447	0.088068	0.026191	0.257712	0.543199	0.260829
-0.067437	0.071175	0.047714	0.455672	-0.164065	0.036845	0.175947	0.047152	-0.034254	0.127409	0.649477	-0.069228
-0.309487	0.256819	0.240585	0.551547	-0.088854	-0.031170	0.109331	-0.114260	-0.011587	0.019462	0.671792	-0.298184
-0.336423	0.192182	0.433831	0.142074	0.095369	-0.113847	0.033630	-0.002773	0.130120	0.016054	0.529583	-0.276112
-0.100733	-0.009608	0.416945	-0.374579	0.200168	-0.170755	0.023411	0.107587	0.289228	0.028928	0.194863	-0.081200
0.188142	-0.099766	0.221448	-0.442544	0.179438	-0.169681	0.066560	0.063293	0.271088	0.037637	-0.115227	0.100649
0.288442	-0.027640	0.067227	-0.161520	0.243930	-0.112415	0.125606	-0.041061	0.005035	-0.115715	-0.180633	0.132461
0.156331	0.080946	0.040960	-0.015281	0.431646	-0.032243	0.179353	-0.027173	-0.319861	-0.118365	-0.049821	0.085305
0.000277	0.125290	0.056345	-0.103483	0.443546	0.020733	0.188059	0.161266	-0.440752	0.314531	0.103713	0.107012
0.068756	0.070423	0.046213	-0.195121	0.182126	0.010350	0.113115	0.150380	-0.332705	0.607334	0.149856	0.121607
0.319504	-0.061449	-0.010434	-0.216503	-0.030527	-0.060518	0.012436	-0.105251	-0.198969	0.393319	-0.011635	-0.041544
0.415313	-0.161374	-0.134591	-0.213067	-0.052783	-0.150354	0.007518	-0.128524	-0.183102	-0.053617	-0.352656	-0.264514
0.169430	-0.136580	-0.251620	-0.136702	-0.139890	-0.214420	0.082835	0.153758	-0.211814	-0.378115	-0.650955	-0.307537
-0.146749	-0.048301	-0.205108	0.010683	-0.371663	-0.238399	0.062396	0.222464	-0.150990	-0.329270	-0.749253	-0.233837
-0.150490	-0.038909	0.004194	0.095473	-0.505584	-0.241621	-0.116206	0.043773	-0.010832	-0.027869	-0.712580	-0.260025
0.112169	-0.154236	0.172292	0.055367	-0.481409	-0.249853	-0.268684	-0.083479	0.074943	0.086122	-0.611635	-0.374877
0.227813	-0.278579	0.159910	-0.050027	-0.467211	-0.264885	-0.232361	-0.184079	0.040929	0.018326	-0.422221	-0.450448
-0.008327	-0.221855	0.039459	-0.162666	-0.451095	-0.260948	-0.103341	-0.209605	-0.038410	0.102409	-0.221087	-0.480003
-0.341661	0.046372	-0.071950	-0.198557	-0.297219	-0.201535	-0.065505	-0.182953	-0.102634	0.143318	-0.167779	-0.447081
-0.443045	0.262832	-0.163848	-0.059955	-0.054702	-0.074477	-0.137015	-0.134530	-0.190280	-0.007043	-0.232429	-0.293321
-0.300134	0.180532	-0.283503	0.176451	0.127999	0.089118	-0.203228	0.027632	-0.278682	-0.089209	-0.233185	-0.158641
-0.131036	-0.047174	-0.398281	0.283785	0.222049	0.222667	-0.180148	0.231477	-0.229570	-0.075957	-0.171560	-0.276860
-0.088387	-0.096760	-0.387029	0.168812	0.253143	0.255964	-0.067397	0.257387	-0.027454	-0.161152	-0.228270	-0.550710
-0.154605	0.012931	-0.212985	-0.058428	0.195561	0.156788	0.073751	0.029134	0.141458	-0.301250	-0.404830	-0.617676
-0.206980	0.011804	-0.041192	-0.259649	0.034717	-0.046560	0.155508	-0.149170	0.151662	-0.381523	-0.497836	-0.378618
-0.120187	-0.122305	-0.037441	-0.331051	-0.165600	-0.273475	0.136583	0.097452	0.071163	-0.413329	-0.427892	-0.095416
0.093082	-0.164003	-0.117711	-0.201612	-0.304510	-0.437039	0.063153	0.327233	-0.019521	-0.325483	-0.295945	0.008587
0.230433	-0.063703	-0.088829	0.025956	-0.343266	-0.488221	-0.000428	-0.005025	-0.099611	-0.063461	-0.179121	-0.060624
0.120028	0.002413	0.034206	0.075229	-0.340197	-0.434534	-0.040912	-0.325221	-0.120390	0.116425	-0.123166	-0.224484
-0.119064	-0.029142	0.059347	-0.159611	-0.364755	-0.320719	-0.063992	-0.019665	-0.050121	-0.120258	-0.187061	-0.398072
-0.192390	-0.063703	-0.084328	-0.381833	-0.395070	-0.191513	-0.054911	0.372295	0.043197	-0.452329	-0.290652	-0.472146
-0.019925	-0.089999	-0.258746	-0.242085	-0.349406	-0.072329	0.004491	0.041146	0.079100	-0.340629	-0.263809	-0.415281
0.149220	-0.157241	-0.306383	0.160791	-0.230450	0.030758	0.105546	-0.426572	0.039417	0.042182	-0.152656	-0.323250
0.075492	-0.154236	-0.195731	0.385771	-0.157541	0.112749	0.207362	-0.218614	-0.078833	0.320970	-0.149253	-0.262270
-0.149741	0.042614	-0.015686	0.249408	-0.188623	0.158936	0.245212	0.218709	-0.236748	0.336879	-0.203318	-0.182210
-0.252622	0.260577	0.091242	0.040088	-0.195147	0.146404	0.186166	0.204064	-0.316838	0.128925	-0.093677	-0.055386
-0.141137	0.233896	0.040960	0.050783	-0.033980	0.062982	0.082457	-0.154049	-0.259415	-0.089209	0.136240	0.020934
0.030956	0.033219	-0.087329	0.190202	0.203623	-0.078056	0.024168	-0.271166	-0.172146	0.039152	0.215287	-0.025457
0.111046	-0.059570	-0.120337	0.200898	0.264659	-0.238757	0.028331	-0.098494	-0.167235	0.392561	0.094258	-0.071473
0.092334	0.009175	-0.004058	0.033976	0.078095	-0.377984	0.044607	-0.074094	-0.215970	0.232712	-0.024868	0.031413
0.036944	0.076812	0.148277	-0.148538	-0.137204	-0.464241	0.050663	-0.134905	-0.239014	-0.382280	-0.091787	0.154167
-0.003090	0.078691	0.243587	-0.183284	-0.170204	-0.479989	0.051420	-0.013284	-0.191791	-0.409164	-0.260785	0.057610
0.012997	0.064786	0.303624	-0.054228	-0.089621	-0.419860	0.021897	-0.023794	-0.041432	0.136879	-0.513337	-0.159015
0.092708	0.036226	0.343399	0.068736	-0.127994	-0.292086	-0.056803	-0.040311	0.161110	0.131197	-0.592732	-0.193059
0.180657	-0.027640	0.315257	-0.000390	-0.323313	-0.120647	-0.140420	0.274285	0.243499	-0.229686	-0.396890	-0.114122
0.213217	-0.073094	0.215069	-0.185194	-0.420396	0.063340	-0.174094	0.381308	0.128231	0.067182	-0.145473	-0.260025
0.190013	-0.050555	0.084112	-0.240940	-0.208194	0.231260	-0.168797	0.069299	-0.005920	0.502409	-0.054357	-0.542853
0.157079	-0.006603	-0.101582	-0.137847	0.143354	0.361943	-0.169176	0.038518	0.031859	0.088773	-0.082335	-0.490852
0.143606	-0.007730	-0.359272	-0.042391	0.294602	0.431403	-0.173338	0.326858	0.169425	-0.505718	-0.079688	-0.032939
0.138367	-0.019375	-0.522437	0.009919	0.217826	0.408488	-0.135502	0.364785	0.197014	-0.373193	0.003110	0.337176
0.104684	0.062532	-0.375401	0.027483	0.181742	0.272434	-0.060587	0.021251	0.046598	-0.046422	0.137753	0.268688
0.017112	0.226004	-0.006308	-0.127538	0.286156	0.046512	-0.030697	-0.295191	-0.164213	-0.016510	0.312866	-0.014234
-0.069307	0.289138	0.209065	-0.406652	0.348728	-0.196524	-0.084423	-0.279425	-0.263948	0.119455	0.487223	-0.065861
-0.026285	0.124162	0.077358	-0.417725	0.237404	-0.360805	-0.115070	-0.177323	-0.192169	0.367182	0.536013	0.269811
0.167933	-0.137332	-0.164598	-0.072173	0.010532	-0.385500	-0.001185	-0.178449	-0.079967	0.313016	0.404772	0.740994
0.307528	-0.251907	-0.193855	0.114572	-0.197066	-0.283496	0.181624	0.054659	-0.103389	0.032336	0.254999	0.953194
0.178786	-0.156114	-0.029564	-0.152357	-0.246183	-0.128163	0.238399	0.371169	-0.243548	-0.212647	0.257647	0.743239
-0.117942	-0.004349	0.055594	-0.392525	-0.135669	-0.003611	0.146045	0.232979	-0.311927	-0.422416	0.300385	0.309856
-0.263471	0.056519	-0.049069	-0.105774	-0.118785	0.039351	0.102896	-0.148794	-0.191791	-0.313746	0.165741	-0.017601
-0.147123	0.052009	-0.163473	0.434664	-0.346336	-0.001463	0.221745	-0.368389	0.055668	0.167561	-0.073261	-0.096912
-0.005709	0.088462	-0.102332	0.627559	-0.523236	-0.090583	0.360277	-0.360131	0.283560	0.405440	-0.156437	-0.044537
-0.068559	0.160239	0.076607	0.372784	-0.348255	-0.177555	0.337945	-0.059455	0.385222	0.327031	-0.055870	-0.036306
-0.236161	0.156105	0.176420	0.037414	-0.038585	-0.222294	0.172919	0.137242	0.379176	0.322864	0.023910	-0.106639
-0.235413	0.058398	0.109628	-0.147393	0.038939	-0.211198	-0.004212	0.021626	0.362925	0.435364	-0.019197	-0.187073
-0.012443	-0.018624	-0.051695	-0.206957	-0.073504	-0.161807	-0.127935	0.090695	0.358011	0.449379	-0.131106	-0.267507
0.188142	0.003164	-0.221237	-0.087446	-0.146413	-0.114921	-0.168797	0.258514	0.314172	0.134985	-0.243771	-0.348315
0.143606	0.089589	-0.352520	0.330386	-0.162530	-0.113847	-0.070046	0.222089	0.254837	-0.353125	-0.242637	-0.298933
-0.075667	0.178653	-0.346143	0.815107	-0.207810	-0.184713	0.144910	0.149629	0.218178	-0.489815	0.022397	-0.003759
-0.226434	0.220743	-0.097081	0.857888	-0.286475	-0.313203	0.281927	-0.074845	0.130876	0.017190	0.491384	0.374601
-0.184908	0.162118	0.289741	0.378132	-0.413489	-0.443482	0.157400	-0.289560	-0.036899	0.681197	0.858630	0.559482
-0.022544	-0.012238	0.542273	-0.059191	-0.618017	-0.502537	-0.153663	0.106461	-0.132856	0.830061	0.924061	0.540769
0.124519	-0.221479	0.570416	-0.011845	-0.782254	-0.437397	-0.367057	0.609621	-0.058055	0.500516	0.770884	0.497356
0.158576	-0.319525	0.543774	0.211593	-0.681333	-0.242337	-0.314465	0.346384	0.067384	0.093319	0.504621	0.430365
0.059025	-0.217347	0.537020	0.062242	-0.255776	0.040067	-0.115070	-0.133404	0.124829	-0.177055	0.095014	0.211054
-0.067811	-0.025010	0.395557	-0.372288	0.273104	0.337239	0.006761	-0.099620	0.157709	-0.163424	-0.380633	-0.084567
-0.051350	0.026831	0.061973	-0.487217	0.652375	0.578198	0.009409	0.113969	0.214776	-0.014616	-0.631295	-0.237953
0.130133	-0.082861	-0.247494	-0.126392	0.859285	0.714611	0.032873	0.190545	0.244633	-0.057782	-0.518630	-0.226355
0.282828	-0.082861	-0.341267	0.129087	0.975600	0.735735	0.135826	0.043023	0.205328	-0.203560	-0.277420	-0.181088
0.243531	0.156481	-0.280502	-0.138993	0.955254	0.660547	0.185409	-0.234004	0.129364	-0.347445	-0.128459	-0.071473
0.103936	0.348514	-0.203233	-0.555564	0.761780	0.524134	0.063153	-0.331227	0.063605	-0.558350	0.058328	0.238000
0.068756	0.212099	-0.125963	-0.648729	0.559861	0.368388	-0.132475	-0.334230	0.015236	-0.661341	0.427843	0.639571
0.169804	-0.086993	-0.034440	-0.574273	0.478095	0.233050	-0.192255	-0.086107	-0.038788	-0.290270	0.764833	0.830814
0.262992	-0.231246	-0.007434	-0.596419	0.382893	0.150343	-0.041669	0.290808	-0.117745	0.455440	0.781853	0.712551
0.254759	-0.209833	-0.094831	-0.462398	0.157557	0.130651	0.186545	0.163518	-0.188769	0.849758	0.542443	0.485380
0.183277	-0.175273	-0.179977	0.034358	-0.053167	0.154281	0.306908	-0.045566	-0.176302	0.495212	0.309841	0.350275
0.076989	-0.114416	-0.130465	0.447651	-0.134134	0.178270	0.264894	-0.016662	-0.033499	0.010374	0.181626	0.314721
-0.099985	0.023826	-0.023563	0.344137	-0.195147	0.166097	0.170648	-0.093614	0.189077	0.073622	0.092367	0.270934
-0.318092	0.133182	-0.034816	0.058422	-0.268056	0.112749	0.149452	-0.081977	0.346674	0.400516	0.023154	0.102895
-0.443793	0.146335	-0.157471	0.156971	-0.200903	0.052599	0.178596	0.232603	0.323242	0.424000	0.014833	-0.251046
-0.416857	0.149717	-0.205858	0.582869	0.007463	0.037919	0.119550	0.418484	0.163378	0.173243	0.058328	-0.663317
-0.328941	0.153475	-0.071200	0.851012	0.128767	0.100218	-0.080261	0.230350	0.022791	-0.136540	0.119977	-0.789019
-0.247010	0.064786	0.163662	0.729927	0.044314	0.219086	-0.286088	-0.038809	-0.014610	-0.244454	0.220204	-0.403310
-0.118316	-0.048301	0.334394	0.368201	-0.120320	0.325782	-0.319384	-0.184830	0.002769	0.015297	0.329508	0.240245
0.050417	-0.036655	0.334394	0.020228	-0.179798	0.340819	-0.172203	-0.112007	0.007302	0.379303	0.294334	0.643688
0.109175	0.038480	0.185425	-0.125247	-0.038969	0.226247	-0.003076	0.096701	0.000502	0.545591	0.052654	0.630964
0.004018	0.053512	0.013947	-0.068737	0.245465	0.020733	0.058611	0.358777	0.024302	0.378925	-0.219953	0.404916
-0.091754	0.094474	-0.064448	0.032066	0.462740	-0.175765	0.029467	0.548037	0.104043	-0.030898	-0.356059	0.144063
-0.035263	0.221870	-0.033690	0.129087	0.461972	-0.262379	0.007896	0.237109	0.211753	-0.323969	-0.380633	-0.076710
0.086720	0.224125	0.066101	0.311287	0.329918	-0.203682	0.069588	-0.348119	0.256727	-0.386824	-0.314093	-0.160137
0.153711	-0.032899	0.228202	0.460256	0.216291	-0.051213	0.202820	-0.334605	0.138057	-0.461796	-0.122788	-0.150036
0.203486	-0.296986	0.455219	0.269652	0.116483	0.093057	0.295932	-0.005776	-0.120390	-0.653768	0.054545	-0.224859
0.285822	-0.312388	0.672105	-0.247813	-0.046260	0.142108	0.228180	0.046026	-0.310416	-0.485271	0.034500	-0.285839
0.336720	-0.207204	0.738146	-0.663620	-0.215485	0.079451	0.024168	-0.054575	-0.218992	0.212637	-0.069102	-0.035184
0.326615	-0.200066	0.583924	-0.644529	-0.190926	-0.028664	-0.143069	-0.070341	0.101020	0.696728	-0.021843	0.367116
0.318382	-0.192929	0.295744	-0.269195	0.150648	-0.075550	-0.144961	0.118098	0.368971	0.370970	0.124137	0.388449
0.297049	0.013307	0.018448	0.116100	0.621281	0.015005	-0.029183	0.237860	0.412055	-0.336464	0.163093	-0.013860
0.175792	0.300036	-0.175851	0.179507	0.831262	0.230543	0.085106	0.027632	0.322486	-0.543583	0.087072	-0.307163
0.024220	0.361667	-0.278627	-0.106537	0.648536	0.474367	0.153994	-0.298569	0.225358	-0.022189	0.028449	-0.199045
0.027588	0.182787	-0.275626	-0.393670	0.358325	0.620089	0.205470	-0.403674	0.083635	0.361121	0.067405	0.088673
0.162693	0.057270	-0.181852	-0.383742	0.256214	0.593952	0.241806	-0.319965	-0.177058	0.010753	0.247435	0.274302
0.181031	0.129424	-0.087329	-0.196648	0.294602	0.419587	0.216068	-0.140911	-0.462286	-0.532223	0.552654	0.278793
-0.001219	0.222622	-0.071200	-0.053846	0.253910	0.200826	0.094190	0.011116	-0.538221	-0.495495	0.798494	0.183359
-0.150864	0.174895	-0.099332	0.122593	0.071953	0.052957	-0.086694	-0.074094	-0.283971	0.177409	0.741762	0.153419
-0.080905	0.049379	-0.097456	0.432754	-0.134134	0.030758	-0.210417	-0.054950	0.120672	0.866425	0.311732	0.179242
0.057902	-0.029142	-0.088079	0.636344	-0.275730	0.102724	-0.167662	0.496966	0.338359	0.861500	-0.321276	0.014573
0.007759	-0.010735	-0.150344	0.486994	-0.381640	0.179702	0.015841	0.965611	0.261640	0.040288	-0.827514	-0.308659
-0.223067	0.119277	-0.250870	0.216176	-0.459920	0.180418	0.174054	0.746685	0.129364	-0.727982	-0.906153	-0.341207
-0.397777	0.283501	-0.235866	0.255137	-0.430757	0.085538	0.166863	0.154134	0.163756	-0.478077	-0.572694	-0.005255
-0.366352	0.288011	-0.037816	0.558422	-0.299905	-0.048707	0.037794	-0.148043	0.249168	0.415667	-0.191219	0.130590
-0.189397	0.090341	0.210191	0.635199	-0.193996	-0.134248	-0.043561	-0.119515	0.127097	0.721728	-0.021465	-0.182210
-0.003838	-0.064078	0.327264	0.333823	-0.111494	-0.117068	0.006383	-0.150296	-0.220881	0.129303	0.108630	-0.412662
0.093831	-0.007730	0.287114	0.137490	0.085772	-0.020074	0.078293	-0.305326	-0.535577	-0.280803	0.413093	-0.176224
0.082229	0.061780	0.228202	0.340699	0.369457	0.070142	-0.000050	-0.215986	-0.570711	0.216803	0.661959	0.190470
0.040313	-0.032523	0.278484	0.412509	0.526463	0.058327	-0.242955	0.171776	-0.347061	0.809606	0.476255	0.300874
0.103936	-0.101268	0.382424	-0.171830	0.482317	-0.094162	-0.446512	0.369291	-0.111700	0.622106	-0.049821	0.234631
0.295552	0.020445	0.339272	-0.865224	0.355254	-0.338614	-0.376516	0.246873	-0.039543	-0.030519	-0.442637	0.153793
[truncated: 13,360 more rows]
