# Supplementary material for: Model Parameter Estimation Method on Multichannel Structural Response from Turbulence Flutter Test
Source: Hindawi journal article supplement (doi:10.1155/2022/3343675), 2022-06-11
Supplement: f1 [file 3343675.f1.zip › data_description.txt]

This file is the experimental data of the flutter flight test using in our manuscript titled "Model Parameter Estimation Method on Multi-channel Structural Response from Turbulence Flutter Test" , which is provide from the China Flight Test Establishment. 

The data file can be opened by Matlab version 2007 and above, and seven variables are included, with brief descriptions as following:
sample rate: 512 
sample time: 30sec

the file name "4 channles-horizontal tail.txt" is the acceleration turbulence response signal including 4 channels meansured from the  front and rear edges of the horizontal tail, as well as the front and rear edges of its wing tip.
the file name "12 channles-wing.txt" is the acceleration turbulence response signal including 12 channels meansured from the symmetrical position of left and right wings
